# Supplementary material for: Perspectives of UK Pakistani women on their behaviour change to prevent type 2 diabetes: qualitative study using the theory domain framework
Source: PubMed Central journal article supplement — BMJ Open. 2014 Jul 8;4(7):e004530. doi: 10.1136/bmjopen-2013-004530 (PMC4091164; doi:10.1136/bmjopen-2013-004530), 2014-07-08
Supplement: bmjopen-2013-004530.draft_revisions.pdf [file bmjopen-2013-004530.draft_revisions.pdf]

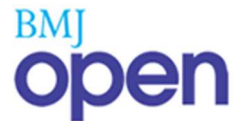

**PERSPECTIVES OF UK PAKISTANI WOMEN ON THEIR  
BEHAVIOUR CHANGE TO PREVENT TYPE 2 DIABETES:  
QUALITATIVE STUDY USING THE THEORY DOMAIN  
FRAMEWORK**

|                                    |                                                                                                                                                                                                                                                                                                  |
|------------------------------------|--------------------------------------------------------------------------------------------------------------------------------------------------------------------------------------------------------------------------------------------------------------------------------------------------|
| Journal:                           | <i>BMJ Open</i>                                                                                                                                                                                                                                                                                  |
| Manuscript ID:                     | bmjopen-2013-004530                                                                                                                                                                                                                                                                              |
| Article Type:                      | Research                                                                                                                                                                                                                                                                                         |
| Date Submitted by the Author:      | 22-Nov-2013                                                                                                                                                                                                                                                                                      |
| Complete List of Authors:          | Penn, Linda; Newcastle University, Institute of Health and Society<br>Dombrowski, Stephan; University of Stirling, School of Natural Sciences<br>Sniehotta, Falko; Newcastle University, Institute of Health and Society<br>White, Martin; Newcastle University, Institute of Health and Society |
| <b>Primary Subject<br>Heading</b>: | Public health                                                                                                                                                                                                                                                                                    |
| Secondary Subject Heading:         | Diabetes and endocrinology, Health policy, Nutrition and metabolism,<br>Qualitative research, Research methods                                                                                                                                                                                   |
| Keywords:                          | General diabetes < DIABETES & ENDOCRINOLOGY, PREVENTIVE<br>MEDICINE, PUBLIC HEALTH, QUALITATIVE RESEARCH, HEALTH SERVICES<br>ADMINISTRATION & MANAGEMENT, Health policy < HEALTH SERVICES<br>ADMINISTRATION & MANAGEMENT                                                                         |
|                                    |                                                                                                                                                                                                                                                                                                  |

SCHOLARONE™  
Manuscripts

only

1  
2  
3  
4 **PERSPECTIVES OF UK PAKISTANI WOMEN ON THEIR BEHAVIOUR CHANGE TO**  
5 **PREVENT TYPE 2 DIABETES: QUALITATIVE STUDY USING THE THEORY DOMAIN**  
6 **FRAMEWORK**  
7  
8

9  
10 Linda Penn,<sup>1,2</sup> Stephan U Dombrowski,<sup>3</sup> Falko F Sniehotta,<sup>1,2</sup> Martin White<sup>1,2</sup>

11  
12 <sup>1</sup> Institute of Health and Society, Newcastle University, Baddiley Clark Building, Richardson  
13 Road, Newcastle upon Tyne, NE2 4AX, UK.

14  
15 <sup>2</sup> Fuse, UKCRC Centre for Translational Research in Public Health

16  
17 <sup>3</sup> School of Natural Sciences, Division of Psychology, University of Stirling, FK9 4LA  
18  
19  
20  
21  
22  
23

24 Linda Penn, Research Associate (corresponding author): [linda.penn@ncl.ac.uk](mailto:linda.penn@ncl.ac.uk)

25  
26  
27 Stephan U Dombrowski, Lecturer in Health Psychology: [s.u.dombrowski@stir.ac.uk](mailto:s.u.dombrowski@stir.ac.uk)

28  
29  
30 Falko F Sniehotta, Reader in Health Psychology: [falko.sniehotta@ncl.ac.uk](mailto:falko.sniehotta@ncl.ac.uk)

31  
32 Martin White, Professor of Public Health: [martin.white@ncl.ac.uk](mailto:martin.white@ncl.ac.uk)  
33

34 **Key Words**

35 Behaviour change

36 Community

37 Cultural adaptation

38 Ethnicity

39 Intervention

40 Type 2 diabetes

41 Intervention

42 Pakistani

43 Physical activity

44 Prevention

45 South Asian

46 Qualitative

47 **Word count = 5623 words**  
48  
49  
50  
51  
52  
53  
54  
55  
56  
57  
58  
59  
60

## ABSTRACT

### Background

Type 2 diabetes (T2D) is a debilitating disease, highly prevalent in UK South Asians, and preventable by lifestyle intervention. The 'New life, New you' (NLNY) preventive lifestyle intervention was culturally adapted for Pakistani women and tested for feasibility. We conducted a qualitative study of participants' perspectives on their behaviour change, to support intervention optimisation.

### Methods

Participants were recruited to NLNY through community-based screening events. Following an eight-week intervention programme Pakistani women, sampled across screening locations, were invited to participate in semi-structured interviews in pairs or groups of three. The topic guide was developed from our previous work based on the Theory Domains Framework (TDF). The Framework approach, with comparison of emerging themes, was used to analyse transcribed data.

### Results

We completed nine interviews involving 20 participants, aged 26-45 (mean 33.5) years. Within the *a priori* TDF domains, (intentions and goals, reinforcement, knowledge, nature of the activity, social role and identity, social influences, capabilities and skills, regulation and decision, emotion, and environment), we identified the importance of social factors relating to participants' own physical activity and dietary behaviour change. We also identified cross-cutting themes relating to collateral benefits of the intervention including: participants' psychological health, 'safety and freedom', (cultural acceptance and feeling comfortable) and 'positive affect' (feeling happier, less isolated, not depressed); 'responsibility' (for others' health, especially family members included in the new PA and diet regimes); and 'inclusivity' (an ethos of accommodating differences).

### Conclusions

Our findings suggest that providing culturally adapted interventions for Pakistani women at risk of T2D will encourage their PA and dietary behaviour change, and may have collateral health and social benefits. The NLNY intervention appeared acceptable, but could be improved by better facility provision. We plan to evaluate recruitment, retention and likely effect of the intervention on participant behaviour prior to definitive evaluation.

## ARTICLE SUMMARY

### Article focus

The 'New life, New you' lifestyle intervention for diabetes prevention was culturally adapted for local Pakistani women and tested for feasibility. In an interview study we sought intervention participants' perspectives:

- On their behaviour change
- On the intervention procedures and cultural adaptations

### Key messages

- We identified the importance of several social factors, relating to participants' engagement in the intervention and their physical activity and dietary behaviour change
- Participants reported intervention benefits regarding their psychological health and positive affect
- Participants expressed responsibility for improving their family's lifestyle and the intention to apply learning from the intervention

### Strengths and limitations

This qualitative study:

- Highlighted cultural adaptations needed to engage Pakistani women in a lifestyle intervention
- Identified unanticipated intervention benefits
- Was limited by data collection early in the intervention timescale and the small study size

## BACKGROUND

Type 2 diabetes (T2D) is a debilitating disease that carries an increased risk of eye, kidney, nerve, and vascular disease with decreased life expectancy.[1] Prevalence of T2D is greater in UK residents of South Asian origin than in the general UK population and the disease often occurs at an earlier age in this population group.[2] Although there is good research evidence for the efficacy of lifestyle interventions for prevention of T2D,[3 4] translation of such evidence to service provision remains challenging [5] and recruitment of South Asian participants to preventive interventions has proved difficult.[6 7] The UK National Institute for Health and Care Excellence (NICE) guidance for risk identification and preventive interventions for high-risk individuals was published in July 2012.[1] This NICE guidance addresses the need to provide services, including risk assessment for those aged 25 to 39 who are not included in the National Health Service (NHS) Health Checks programme. The

1  
2  
3 need to provide risk assessment and preventive opportunities for younger adults is particularly  
4 relevant for ethnic minorities.[1]  
5  
6

7 The 'New life, New you' (NLNY) intervention for primary prevention of T2D was developed in  
8 Middlesbrough and has to date been evaluated through a feasibility study.[8-10] According to UK  
9 government statistics, Middlesbrough ranks as one of the ten most deprived areas in England based  
10 on the index of multiple deprivation (IMD) ranks of localities (lower super output areas (LSOA))  
11 within the town.[11] The original NLNY intervention primarily targeted middle and older aged adults  
12 in low income groups, priority groups identified using market segmentation of the Sport England  
13 Active People survey.[12] The NLNY intervention was designed to be delivered in leisure and  
14 community settings and to recruit participants directly from the community, rather than relying on a  
15 health services referral route. Recruits to the NLNY intervention were assessed for individual risk of  
16 future T2D, using the Finnish diabetes risk score (FINDRISC)[13] and the primary focus of the  
17 intervention was on increased physical activity. The NLNY intervention design incorporated NICE  
18 guidance requirements and was delivered through a programme of weekly supervised physical  
19 activity sessions, each followed by reflection and advice,[14] with follow-up assessment at six and 12  
20 months. Details of the original NLNY intervention feasibility and pilot studies have been published.[8  
21 10] In Middlesbrough there is a South Asian community that comprises about 6.1% of the total  
22 population (8461 of a total population of 138,700 in 2011).[15] Although participants from the local  
23 ethnic minority communities were not excluded from the original NLNY intervention, few were  
24 recruited. To better engage members of the local ethnic minority communities, we planned a  
25 cultural adaptation of the NLNY intervention.[16 17] To develop the adapted intervention and its  
26 evaluation the NHS commissioners convened an operational group that included community health  
27 champions as well as health and fitness workers. The adapted NLNY intervention was informed by  
28 mapping the distribution of ethnic minority communities within the Local Authority area, followed  
29 by stakeholder consultations. The project delivery was managed by an NHS health improvement  
30 specialist. One adaptation of the NLNY intervention specifically targeted Pakistani women. As  
31 anticipated, and confirmed in stakeholder consultations, the main concern for local Pakistani women  
32 was the availability of culturally appropriate services. Thus the need for single sex physical activity  
33 group sessions was of paramount importance in adapting the NLNY intervention for this population.  
34  
35  
36  
37  
38  
39  
40  
41  
42  
43  
44  
45  
46  
47  
48  
49  
50

51 The intervention that was provided for the Pakistani women was delivered through a Community  
52 Interest Company (CIC). The CIC was founded and registered by three local women (two of Pakistani  
53 and one of Arabic heritage) who are directors of the company (NUR FITNESS CIC registration number  
54 08143445 <http://www.bis.gov.uk/cicregulator>). The intervention was delivered by one CIC founder  
55  
56  
57  
58  
59  
60

1  
2  
3 member, who recruited other local Pakistani women to assist with intervention delivery. These  
4 women received training to qualify as fitness trainers or in some cases training to deliver the  
5 nutritional aspects of the intervention. The NHS commissioners provided funding and facilitated  
6 these training opportunities. The feasibility study for the adapted NLNY intervention is on-going and  
7 we plan to collect outcome data comprising weight and waist measurements along with self-report  
8 data on physical activity, diet, and quality of life at six and 12 months of follow-up in a before and  
9 after pilot study design.  
10

11  
12  
13  
14  
15 In this paper, we report a qualitative interview study that was conducted as part of the feasibility  
16 and acceptability evaluation of the adapted NLNY intervention for Pakistani women, in line with the  
17 MRC guidance for the development and evaluation of complex interventions to improve health.[18]  
18 In this interview study we aimed to investigate Pakistani women's perspectives of their behaviour  
19 change and salient features of the culturally adapted NLNY programme, to inform the optimisation  
20 of the intervention prior to formal piloting and definitive evaluation.  
21  
22  
23  
24

## 25 **METHODS**

### 26 **Intervention**

27  
28  
29 Participants were recruited to the adapted NLNY intervention for Pakistani women through women-  
30 only assessment events that were organised by the project manager in consultation with the  
31 intervention delivery staff and community health champions (members of the community who have  
32 received training to promote health messages locally). These events took place in community venues  
33 in the areas of the town partly populated by the Pakistani community. Initial individual risk  
34 assessment was based on FINDRISC scores. [13] [19] Other data were collected at the assessment  
35 events, including self-report physical activity and dietary data. Follow-up assessments, as part of the  
36 service delivery and feasibility evaluation, were planned at six and 12 months.  
37  
38  
39  
40  
41  
42

43  
44 Women recruited to the intervention took part in an eight week programme of weekly sessions,  
45 delivered to groups of between 10 and 20 women. The sessions comprised approximately 60  
46 minutes of supervised group physical activity followed by 30 minutes of reflection and advice  
47 centred on dietary information and action planning. Participant received a booklet that included  
48 information, goal setting and action planning prompts with space for recording their progress. The  
49 information provided about a healthy diet was specifically tailored to the participant group,  
50 incorporating their preferred foods and cooking styles. The participants were also able to access  
51 additional physical activity sessions at different times of the week, delivered by the same provider.  
52 These additional sessions were made available to participants both alongside and following the eight  
53  
54  
55  
56  
57  
58  
59  
60

1  
2  
3 week course. These sessions were provided at no cost to the participants for up to six months and  
4 later at low cost. Most of the activity sessions were delivered in community halls, including school  
5 halls. In the early stages of the programme the women had access to a community gym, where their  
6 exclusive use was assured for some mornings, but this facility was later closed.  
7  
8

9  
10 The provider ensured that information about different sessions was easily available and regularly  
11 updated. This was facilitated via a social networking page (i.e. Facebook) that the provider initiated;  
12 others relied on text messages, also from the provider, or accessed information by keeping in touch  
13 with other women participants.  
14  
15

### 16 17 **Design and participants**

18 We obtained ethical approval for the study from Newcastle University Ethics Committee. All  
19 participants received information and gave written informed consent prior to taking part in the  
20 feasibility study and the interview study separately.  
21  
22

23  
24 For the qualitative interview study we purposively sampled participants from the feasibility study to  
25 ensure representation from the three different areas of the town where early recruitment and  
26 intervention delivery took place. The interviews were scheduled shortly after the first three groups  
27 of women had completed their eight week intervention programmes. The NLNY evaluation team did  
28 not have access to participant contact details so the interview invitations and arrangements were  
29 made by the intervention delivery staff following guidance from the research team. The researcher  
30 who conducted the interviews did not know any of the participants prior to the interviews. Our  
31 previous work [9] and the Theoretical Domains Framework (TDF), [20] a framework that groups  
32 component constructs from relevant behavioural theories into theoretical domains, were used to  
33 inform the topic guide for this study. The topic guide was refined as the interviews progressed.  
34  
35  
36  
37  
38  
39  
40

### 41 42 **Data collection**

43 Group interviews involving two or at most three participants were planned to encourage  
44 participation and these were conducted in English language by the female researcher (LP, MSc,  
45 Research Associate). The interviews were conducted in the community venues where the  
46 participants attended their physical activity sessions and were co-incident with on-going sessions  
47 although always in a separate room. Interviews lasted between 60 and 75 minutes. As in previous  
48 work, [9] we allowed flexibility within the areas outlined in the topic guide and the women were  
49 encouraged to report what mattered to them. Active listening with prompts was employed to  
50 provide clarification and improve insight. Notes were made of related topics introduced by the  
51 participants and the topic guide was developed as the interviews progressed. All interviews were  
52 audio-recorded and transcribed, as close to verbatim as possible.  
53  
54  
55  
56  
57  
58  
59  
60

### Analysis

We used the Framework approach[21] for data analysis. Transcripts were read, checked, and imported into NVivo V9 [22] to facilitate coding. The themes emerging from the data were first classified according to the *a priori* theoretical domains identified from the TDF and included in the topic guide as: intentions and goals; reinforcement; knowledge; nature of the activity; social role and identity; social influences; capabilities and skills; behavioural regulation and decision; emotion; and environment. LP performed the initial classification according to the TDF themes and these were then checked by SUD, differences being resolved through discussion. The use of NVivo software and the TDF defined *a priori* categories facilitated the analysis and promoted familiarisation with the data. Further analysis of the data within each of the theoretical domains, and reference to an empirical phenomenology approach, [23] which is primarily about retaining the appreciation of the respondents' subjective world, led to the identification and agreement of cross cutting constructs.

### RESULTS

We conducted nine interviews (seven dyad interviews and two interviews with groups of three participants). All 20 interview participants were female and Pakistani, with ages ranging from 26 to 45 years with a mean of 33.5 years. For this group of interview participants, their baseline risk of future T2D based on FINDRISC score ranged from 11 to 22 with a mean score of 15 and their IMD scores, based on LSOA of residence from provided post-codes, ranged from 11 to 78 with a mean IMD score of 43. Details of participant characteristics are shown in Table 1.

**Table 1: Participant baseline variables: group means**

| Group identifier        | Number in the group | Age (years) | FINDRISC score | IMD score |
|-------------------------|---------------------|-------------|----------------|-----------|
| A                       | 2                   | 33          | 20             | 46        |
| B                       | 2                   | 30          | 12.5           | 52        |
| C                       | 2                   | 31          | 13             | 78        |
| D                       | 3                   | 35          | 15             | 69        |
| E                       | 2                   | 36          | 13             | 20.5      |
| F                       | 2                   | 40          | 14.5           | 37        |
| G                       | 3                   | 32          | 14             | 18        |
| H                       | 2                   | 29          | 14.5           | 29.6      |
| I                       | 2                   | 45          | 17             | 34.5      |
| <b>All participants</b> | 20                  | 34          | 15             | 43        |



1  
2  
3 Some women were less confident in their use of English language than others and the women  
4 tended to organise themselves so that the interview groups included at least one participant who  
5 was confident in her own ability to express herself in English. Sometimes the women would converse  
6 briefly between themselves in their first language to check their use of English. Those who were  
7 more confident tended to speak more, although this was sometimes to clarify what the other person  
8 had said for the benefit of the researcher, who only spoke English. Quotes are assigned to groups  
9 (Table 1) and where group discussion is reported we have used numerals (i, ii) to identify different  
10 speakers.

11  
12 Within the *a priori* TDF domains, (intentions and goals, reinforcement, knowledge, nature of the  
13 activity, social role and identity, social influences, capabilities and skills, regulation and decision,  
14 emotion, and environment), we identified and analysed the anticipated theme relating to  
15 participants' own physical activity and dietary behaviours. We also identified three further cross-  
16 cutting themes which we have grouped as 'collateral health and social benefits'. These three  
17 composite themes related to participants' perspectives of their psychological health, 'safety and  
18 freedom', (cultural acceptance and feeling comfortable) and 'positive affect' (feeling happier, less  
19 isolated, not depressed); their family role, 'responsibility' (for the health of others especially family  
20 members, who were included in the new PA and diet regimes); and 'inclusion' (an empathetic ethos  
21 of inclusion and accommodation of differences).

## 22 **Participants own physical activity and dietary behaviours**

### 23 ***Intentions and goals***

24 Health concerns were frequently stated as a reason for taking part in the intervention and there was  
25 an appreciation of the increased diabetes risk associated with Asian ethnicity as described by one  
26 woman,

27  
28 *'I just about got myself motivated that it's for health reasons ... especially with the diabetes... we  
29 as Asians, we get diabetes.'* (Group I).

30 Occasionally less explicitly health associated reasons would be mentioned such as,

31  
32 *'Because we will gonna be like fit and we are gonna be smart and look nice.'* (Group C)

33 The intervention documentation was organised by the provider to promote action planning and this  
34 was recalled as explained in this quotation,

35  
36 *'Every week we give a self-challenge, we are not going to do this, we are not going to eat this, we  
37 are going to eat something else.'* (Group C).

1  
2  
3 More generally goal setting was closely related to being part of the group and the need to engage  
4 with group activities,  
5

6  
7 *'We have to go to the classes: we try our best to go to classes.'* (Group A).  
8

### 9 **Reinforcement**

10 Most of the reinforcement centred on feedback from other people, especially others in the group,  
11 for example,  
12

13  
14  
15 *'It was pointed out that I was getting more defined on my waist and that was like really brilliant.*

16  
17 *It was a great motivator.'* (Group F)  
18

### 19 **Knowledge**

20 Tailoring of dietary advice was much appreciated. There was frequent reporting of quantities of oil  
21 and salt to include in making home cooked curries, often introduced with an air of disbelief  
22 regarding how much oil and salt they had previously added to cooked food. They appreciated advice  
23 to reduce these quantities gradually so that the change in taste was less obvious, but they explained  
24 that as they became used to the different tastes they even preferred them.  
25  
26  
27

28  
29 Perhaps surprisingly the risk effect of family history needed clarification, as explained here,  
30

31  
32 *'I know my uncle in Pakistani, he's got diabetes and his leg is quite bad actually. I didn't know, I*  
33 *didn't realise I would be at risk, because he's an uncle, he's not my dad and then it was quite a bit*  
34 *of a shock when they said no actually he's part of your family.'* (Group E).  
35  
36

### 37 **Nature of the activity, capabilities and skills**

38 There was a range of experience within this group of women. Many were quite new to the physical  
39 activities that were presented in the programme and were gradually attuned to them by the  
40 trainers, as explained by one woman,  
41  
42

43  
44  
45 *'They proper explain it, they do exercise and they keep telling us as well both ways.'* (Group A)  
46

47 Generally the opportunity to participate in physical activity was valued and the women were pleased  
48 with what they had achieved. One woman described her effort and the beneficial effects she felt,  
49

50  
51 *'Trust me when I do work-out I'll be drenched, you know, and there's lots of ladies that really put*  
52 *the effort in, but it's like built your confidence.'* (Group G).  
53  
54  
55  
56  
57  
58  
59  
60

### ***Social role and identity, and Social influences***

These domains were particularly important for this group of Pakistani women and additionally contribute to the cross-cutting collateral benefits that we identified (detailed below). The women were mostly homemakers and mothers and often described themselves in relation to this role,

*'You put yourself back and you give your children more.'* (Group F).

The social responsibility to provide hospitality was sometimes seen as detrimental to their progress in achieving a healthy lifestyle,

*'I have to buy some unhealthy foods in, just because it's the norm, people expect something like that on the table and what happens is, if I bought it in I'll end up eating it myself.'* (Group F).

There was an expectation that the CIC providers would understand and accept the social and cultural issues that were pertinent to this participant group, because the delivery staff themselves were from the Muslim community as described by one woman,

*'Because she's [trainer] Asian as well, she knows how to change basically, she knows the things that Asians ...whereas English people have different diet to what Asians do, our diet is totally different, whereas she helped us a lot by telling us small changes that we could make in our daily intake of food and the like type of cooking that we could do.'*

The appreciation of the efforts that were being made by the CIC providers who were known to many of the women participants was evident. This was described by one interviewee,

*'I think [they are] helping our Asian community ladies, especially the oldies to come out [of the house]. ... They give her [the trainer] blessing.'* (Group D).

Recruitment by word of mouth was emphasised; people described how they had been encouraged to come by reassurance from those already engaged in the programme such as:

*'Friends are like encouraging you. 'no you have to come, you have to come,' just it helps socialising and get out as well, because you don't realise you can get out,'* (Group G), and *' it really helps to have someone saying actually it's ok to come,'* (Group B).

The women also described how later on they themselves had encouraged others and become 'champions' in promoting the intervention,

*'And then after I tell them it's really nice, come you see, it's really, really nice'* (Group B).

### **Regulation and decision**

Regulation centred on attending the physical activity sessions, where prompts to attend were naturally provided as part of the women's usual routine. For example after taking the children to school the women could attend a session in an adjacent community venue.

*'Every Monday we go, [to the activity session] like half nine till half ten,' (Group C).*

With regard to diet there was some appreciation of the need for portion size control, for example by using a smaller plate. Sweet fizzy drinks were perceived as addictive, therefore difficult to regulate and better avoided. The dietary advice offered included information about reading food labels, which was reported as helpful for making decisions about food choices. The fact that some sweet foods, specifically intended for Asian festivals, did not have nutrition labels was mentioned by some of the women participants.

### **Emotion**

Worry about the risk of diabetes, because of family members with the disease, and concern for relatives already suffering from diabetic complications was often mentioned. Retinopathy was specifically mentioned where it had affected younger aged relatives to the detriment of their quality of life.

There was also some mention of possible embarrassment about going to the gym, described as,

*'Making a fool of myself,' (Group E)*

In contrast the enjoyment experienced by participating in the activity sessions was often mentioned.

*'We have a good laugh and we have good things.'(Group C)*

*But then the time flies by, you don't realised where the time has gone and you had a workout, but you had a laugh.' (Group E)*

*It's the motivation of seeing each other and as well as having a laugh, you enjoy your time here.'*  
*(Group B)*

### **Environment**

The main environmental issue, as anticipated for this population group, was the provision of a female only facility. This is a broader criterion than just a single room, for example in a leisure centre, set aside for an hour. This requirement includes access to changing and toilet facilities with reassurance that the area would be securely restricted to women during the sessions and no man

1  
2  
3 would accidentally just walk in. There were also environmental issues of concern around the cold  
4 weather and the cost of attending sessions (once the free and subsidised period had expired).  
5  
6

7 *'It's so cold. At the moment I've stopped walking because it's cold. (Group A)*

8  
9 *'In the park all friends go together but sometimes I said I don't want to go 'it's too cold' (Group D)*

10  
11 *'You have to look at it from the financial point of view, how much is the charge going to be? If I*  
12 *want to come three times a week how much is that going to be? (Group F)*

13  
14  
15 *'Everything is expensive nowadays, just your basic household things cost an arm and a leg, so*  
16 *money is a big issue, but I think just for fitness the prices that they've got now are reasonable'*  
17  
18  
19 *(Group H)*

## 20 21 **Collateral health and social benefits**

### 22 **Psychological health**

23  
24  
25 The first part of this theme relates to participants' perspectives of their psychological health, 'safety  
26 and freedom' (cultural acceptance and feeling comfortable) and 'positive affect' (feeling happier,  
27 less isolated, and not depressed).  
28  
29

30  
31 Reference to Islamic culture used in engagement strategies was influential, as described by one  
32 participant,  
33

34  
35 *'The advert [Radio Ramadan] was talking Islamic, like people in Islam history, the women. In*  
36 *those days women were like quite fit and strong and they had to be and that's what got me in [to*  
37 *the programme] (Group D).*

38  
39  
40 Similar references were used by the community provider during the sessions and contributed to the  
41 perspectives of cultural acceptance that made the women comfortable,  
42  
43

44  
45 *'You know the instructor... and sometimes they talk in our own language and we just do jokes.'*  
46  
47 *(Group A)*

48  
49 Feeling safe and comfortable was a regular and much emphasised theme, as described clearly by  
50 members of one group,  
51

52  
53 *'i) It's easy for me to say, 'I'm going to a ladies only gym, there's no men there,' and I know there*  
54 *will be no disapproval from the male side of our family.*

55  
56 *ii) I felt like the whole mental pressure was lifted because I could justify to anyone that I am in an*  
57 *entirely female environment.*  
58  
59  
60

1  
2  
3 *i) He [husband] is in the mind that my wife is in a safe environment. ii) It is completely peaceful in*  
4 *mind. (Group F)*  
5  
6

7 The relief from anxiety was expressed by one participant as,

8  
9 *'You can just do exercise, you are not like wary - is anyone [male] suddenly going to walk through*  
10 *the door.'* (Group D)  
11  
12

13 Other aspects of feeling safe were about confidence to exercise. For example,

14  
15 *'That's what they teach you, 'listen to your own body', whatever your body allows you go to that*  
16 *speed and level. With me being a blood pressure patient..... Absolutely I found no fear, no worry*  
17 *and I was in a good safe environment.'* (Group F).  
18  
19  
20

21 The purposeful social grouping appeared to promote greater confidence within participants'  
22 perceived role: as described by one woman when talking about cooking for the family,  
23

24  
25 *'if you are the main cook then it's part of your role, if you got the knowledge [re: healthy food*  
26 *choices] (Group G)*  
27  
28

29 Another woman talked about cooking for her husband,

30  
31 *'When I go home I say, 'I'm going to cook and you are going to eat, this is how I am going to*  
32 *cook.' Husband was a bit like, you know, like it is -isn't it? 'Ah, you are not going to cook like that?'*  
33 *'Oh yes I am, but it will taste nice.'* (Group F).  
34  
35  
36  
37

38 There were also explicit references to depression such as,

39  
40 *'She [relative] spent time at home a lot and I think a lot of depression got to her'* (Group E)  
41  
42

43 Two women in another group discussed depression in relation to the intervention,

44  
45 *'i) If you stay home all day obviously it's different isn't it? I was very, very lazy. I didn't used to go*  
46 *out. I just used to stay at home all the time.*  
47

48 *ii) Watch TV.*

49 *i) Watch TV and just do the housework and just eat. Sit down in one place. So now I am very*  
50 *active. This year we got the choice to get depressed or to go out and get fresh'. (Group A).*  
51  
52  
53

#### 54 **Health of others**

55 The women's pivotal role within the family as the main cook was perceived as conveying a  
56 responsibility for their family's health that was often explained such as,  
57  
58  
59  
60

1  
2  
3 *'We have responsibility, we doing the shopping, we bring all the best things back for them' (Group*  
4 *D).*

5  
6  
7 In relation to this there were clear statements that the knowledge and support the women had  
8 received through the programme would empower them to make healthy changes for their own  
9 benefit with the added consequence of influencing other family and community members. One  
10 person clearly spoke about this as:

11  
12  
13  
14 *'By educating the women I think what you are doing is you are empowering the women to sort of*  
15 *make decisions, informed decisions 'cos they know that, 'this is right', this is wrong'. Then they are*  
16 *in turn helping their younger, and extended elders.'* (Group F)

17  
18  
19 Similarly another woman described how her perception of responsibility had changed,

20  
21  
22 *'Now I go outside [of the house, to the sessions] I know what to do to my child you see. I want*  
23 *to give good things you know.'* (Group D)

24  
25  
26 A description of specific changes was supplied by another group,

27  
28  
29 *'We have stopped biscuits, we stopped cakes, we stopped crisps, we stopped everything, even*  
30 *we stopped white bread as well, we start brown bread and everything like brown rice.'*

31  
32  
33 This confidence to change extended to encouraging their children to exercise and even jokingly to  
34 the possibility that they might influence their husbands as explained in discussion with laughter  
35 by one group,

36  
37  
38 *'i) I wanna send mine [husband].*  
39 *ii) Yeah, I said to mine, 'Get out there'.*  
40  
41 *i) They are jealous wasn't it, looking at us, and now, 'Look we [imagining husbands' speaking]*  
42 *need to work out.'* (Group G).

43  
44  
45  
46 There was also an appreciation by the women of the way their own health would impact on others  
47 as explained in the following,

48  
49  
50 *'I'm the one that makes – does everything, if for some reason my health suffers then everyone*  
51 *else in our family suffers.'* (Group E)

## 52 53 54 **Tolerance**

55  
56 The Pakistani women within this group had a range of faith related preferences. A particular  
57 example was that some women did not want to participate in activities that involved music and the  
58

1  
2  
3 other women in the activity group were encouraged, by the trainer, to respect and accommodate  
4 these wishes so the issue was resolved with tolerance. This issue and its resolution were reported by  
5 one or two groups,  
6  
7

8  
9 *'Then [the trainer] said, 'No, they don't like music on' then [everyone] agree as well. They said,*  
10 *'Oh you are so kind, because we don't like music.'* (Group C).  
11

12 Although this intervention targeted ethnic minority participants, the additional physical activity  
13 sessions run by the community provider were open to other paying customers and attracted a few  
14 of the local women from the white population, who were welcomed as described by one woman,  
15  
16

17  
18 *'Four white women were there and we had such a laugh with them as well, you know trying to*  
19 *speak our lingo and we were like, we tried like, the one that do speak English they are trying to*  
20 *say their words... we are having a laugh and everything'* (Group E).  
21  
22

23  
24 This inclusivity was similarly described by another group,  
25

26  
27 *'i) The more the merrier and I think as long as it is women only it doesn't matter what ethnicity or*  
28 *what race or what age, we don't care .*

29  
30 *ii) I'm sure women from non-Muslim background they will probably feel intimidated by gyms*  
31 *anyway and they might find coming to a women only gym- Wow this is great!'* (Group F).  
32  
33

34 The women themselves even encouraged wider participation,  
35

36  
37 *'I've been recommending it to lots of Asians [and] English ladies, because they [all] like Bollywood*  
38 *music don't they?'* (Group G).  
39

40 The appreciation of issues that would be common to all women was described by one group  
41 member as,  
42  
43

44  
45 *'When women work together from different cultures we all find that we have the same fears, the*  
46 *same sort of issues about our bodies and how we want to look better'*(Group F) .  
47

## 48 **DISCUSSION**

### 49 **Main findings**

50 This qualitative study suggests that provision of culturally adapted lifestyle interventions will  
51 facilitate the engagement of Pakistani women and encourage their physical activity and dietary  
52 behaviour change. The study results emphasise the importance of social influences and the women's  
53 own perceived social role and identity for the development of acceptable interventions. The  
54  
55  
56  
57  
58  
59  
60



1  
2  
3 women's appreciation of the tailored intervention provision and their enthusiastic participation in  
4 moderate to vigorous physical activity were important findings. The fact that the delivery staff were  
5 from the local Pakistani women's own community contributed to recruitment and engagement of  
6 the participants. The opportunity for Pakistani women to participate in culturally acceptable social  
7 engagement in a proactively healthful context may have important health and social benefits in  
8 addition to those specifically intended by the intervention. We have described these unanticipated  
9 additional effects as 'collateral health and social benefits.' These collateral benefits are: a potential  
10 positive impact on the women's own psychological health including reduction in feelings of isolation  
11 and depression; improved knowledge and confidence with which to fulfil their perceived role as  
12 having responsibility for providing healthy food for their families and thus encouraging healthy  
13 lifestyles in their children; and an ethos of tolerance for the range of different cultural variation  
14 within local groups of women.  
15  
16  
17  
18  
19  
20  
21  
22

### 23 **Strengths and limitations**

24 This qualitative study was conducted quite early in the life of the intervention programme, when the  
25 women had been involved in the intervention for less than six months. It was not clear whether early  
26 enthusiasm for the intervention would be sustained. The interviews were conducted in English,  
27 which was not the participants' first language. Although participants could all speak some English  
28 and were able to translate for each other to an extent, the accuracy of these translations remains  
29 unclear. The small group, mostly dyadic, format for conducting the interviews, and the fact that they  
30 took place alongside intervention sessions that the women would usually be attending, facilitated  
31 study engagement. The disadvantage of this was that the interview rooms were not very quiet and  
32 so some of the recordings were difficult for the staff undertaking the transcriptions. We were able to  
33 call on an experienced staff team to ensure the transcriptions were as accurate as possible. The  
34 interview arrangements were made by the intervention delivery staff, which could mean some bias  
35 in the choice of respondents, although we accessed women from different areas of the town and we  
36 were aware of a diverse range of cultural differences among Pakistani women who participated. The  
37 researcher who conducted the interviews was not Pakistani and only spoke English; however, the  
38 interviewees were open and friendly, keen to communicate their views and to do so in a way that  
39 could be understood beyond their cultural group. The group of women who took part in the  
40 interview study were aged from 27 years to 45 years and most were under 40 years of age. This is  
41 the younger age range of the typical target population for T2D prevention. We do not know how  
42 effective the intervention will be in attracting older women. There was some suggestion that these  
43 younger women might recruit older relations to take part in the intervention and it will be valuable  
44 to assess the recruitment age profile over time.  
45  
46  
47  
48  
49  
50  
51  
52  
53  
54  
55  
56  
57  
58  
59  
60

### Comparison with other studies and implications

The NICE guidance for risk identification and provision of preventive interventions for high-risk individuals included recommendations for adults aged 25 to 39 of South Asian ethnicity, who are not included in the NHS Health Checks programme.[1] The findings from a recent National Institute for Health Research (NIHR) Health Technology Assessment evidence synthesis confirmed the importance of adapting health promotion interventions for ethnic minority communities and suggested that adaptation decisions should be based on detailed understanding of the target community.[16] Our plans for the adaptation of the NLNY intervention [10 24] to engage people from the local ethnic minority communities were therefore appropriate. The service commissioners took the lead in convening an operational group that included representation from the evaluation team. The commissioners were able to expand existing community links. Members of the local ethnic minority communities were invited to a dissemination seminar that was arranged to promote the NLNY intervention in its original format and invite interest in the adaptation.

In the interview study reported here we sought to explore Pakistani female participants' views and we were able to draw on information from our qualitative process evaluation within the original NLNY intervention.[9] As we experienced with the original NLNY intervention, community based recruitment was successful. The benefit of community based recruitment procedures was also experienced in the PODOSA trial.[7] The adapted NLNY intervention was unusual in being provided through a CIC.[25] It was evident that some of the women interviewed knew the intervention providers and that this positively affected their confidence and decision to participate.

The social support engendered by the nature of the intervention was evident, as it was in the original NLNY intervention, and this reflects the more general literature around social support and behaviour change.[26] The social needs of this specific participant group were of paramount importance for their engagement and confidence to become involved in the intervention. The provision of occasional female only sessions in local authority leisure centres does not constitute ideal provision of appropriate facilities. However, in this feasibility phase the provision of staff training so that women from the Pakistani community could conduct physical activity sessions in appropriate and convenient community venues, including school premises, was of immediate importance for the continued intervention delivery.

The identification of beneficial effects on other aspects of participants' own health that may result from their participation in physical activity intervention delivered in social groups and the 'spill over' effects of health promotion on other family members is supported by other evidence. [27-30] This additional benefit may have importance for health economic evaluation of interventions designed to

1  
2  
3 promote increased physical activity, especially where these are delivered to groups that are  
4 organised to promote social support networks.  
5  
6

### 7 **Unanswered questions and future research**

8 The feasibility study of the adapted version of the NLNY intervention, which was planned to better  
9 engage members of the local ethnic minority communities, is on-going and we plan to analyse the  
10 outcomes at 12 months follow-up. This feasibility study, together with our previous work relating to  
11 the original NLNY intervention[8] and the related qualitative studies[9] will inform plans for  
12 optimisation of the intervention and for definitive evaluation of the NLNY intervention for  
13 effectiveness and cost effectiveness.  
14  
15  
16  
17  
18  
19  
20

### 21 **Acknowledgements**

22 We thank the participants in the adapted version of the New life, New you intervention, particularly  
23 those who gave their time for these interviews. We thank the project implementation team  
24 including NHS health promotion staff and intervention delivery staff, especially Claire Robinson and  
25 Shazia Noor.  
26  
27

### 28 **Funding**

29 Integral to the London 2012 Olympic and Paralympic Games was the aspiration that the Games  
30 would encourage more people across the UK to participate in physical activity. In the North East of  
31 England this Olympics vision and the regional health strategy provided the foundation for the 'New  
32 life, New you' intervention that was originally funded as a 2012 Olympic Legacy Project by a  
33 consortium including: Sport England, Middlesbrough Council, Middlesbrough Primary Care Trust, the  
34 North East Strategic Health Authority. The adapted version of the New life, New you intervention  
35 was designed to better engage the local ethnic minority community and funded by Middlesbrough  
36 Primary Care Trust.  
37  
38  
39

40 MW and FFS are funded in part by the British Heart Foundation, Cancer Research UK, the Economic  
41 and Social Research Council, Medical Research Council and National Institute of Health Research  
42 (NIHR) as director and senior investigator respectively of Fuse - the Centre for Translational Research  
43 in Public Health, which is a UKCRC Public Health Research Centre of Excellence. The funders had no  
44 role in study design, data collection and analysis, decision to publish, or preparation of the  
45 manuscript. The views expressed herein are those of the authors and not necessarily those of the  
46 above named funders or UKCRC.  
47  
48  
49

### 50 **Abbreviations**

51 CIC Community Interest Company

52  
53  
54 FINDRISC Finnish Diabetes Risk Score

55  
56  
57 IMD UK Government Statistics index of multiple deprivation  
58  
59  
60

1  
2  
3 NICE UK National Institute for Health and Care Excellence

4  
5 NLNY 'New life, New you' intervention

6  
7 T2D Type 2 diabetes

8  
9 TDF Theoretical Domains Framework of behaviour change

10  
11 REPS UK Register of exercise professionals

### 12 13 **Authors' contributions**

14 MW was a member of the Steering Group responsible securing funding and for the outline plan for  
15 the original NLNY intervention and evaluation. LP contributed to the development of the NLNY pilot  
16 intervention and designed the feasibility evaluation. Adaptation of the NLNY intervention was later  
17 planned to better engage local ethnic minority communities. This interview study was planned by LP  
18 as part of the evaluation of the adapted NLNY intervention. LP conducted the interviews. FFS, SUD  
19 and MW provided advice on the analysis. LP conducted the preliminary analysis which was then  
20 discussed and agreed with SUD. MW, FFS and SUD, reviewed, and contributed to the manuscript  
21 drafted by LP. All authors read and agreed the final version.  
22  
23

### 24 25 **Competing interests**

26 The business case and outline plan for the original 'New life, New you' study was determined by a  
27 steering committee. This included representatives from members of the organisations that  
28 comprised the funding consortium as well as the Principal Investigator for the evaluation, co-author  
29 MW. The detailed development of the intervention was then progressed by a small operational team  
30 including the evaluation researcher, co-author LP. The adapted version of the New life, New you  
31 intervention was funded by Middlesbrough PCT. The funders had no role in the collection, analysis,  
32 and interpretation of data, the writing of the article and a decision to submit it for publication. Co-  
33 authors: MW, FS, SD and LP receive salaries from Newcastle University, Institute of Health and  
34 Society that provide open access funding for the publication. The authors declare that they have no  
35 other competing interests.  
36  
37  
38

### 39 40 **Data sharing**

41 There is no additional data available

### 42 43 **References**

- 44 1. NICE. PH 38 Preventing type 2 diabetes - risk identification and interventions for individuals at  
45 high risk. 2012. <http://guidance.nice.org.uk/PH38> (accessed 17/09/2013).
- 46 2. Forouhi NG, Merrick D, Goyder E, et al. Diabetes prevalence in England, 2001—estimates from an  
47 epidemiological model. *Diabetic Medicine* 2006;**23**(2):189-97 doi: 10.1111/j.1464-  
48 5491.2005.01787.
- 49 3. Knowler WC, Barrett-Connor E, Fowler SE, et al. Reduction in the incidence of type 2 diabetes with  
50 lifestyle intervention or metformin. *New England Journal of Medicine* 2002;**346**(6):393-403
- 51 4. Tuomilehto J, Lindstrom J, Eriksson JG, et al. Prevention of type 2 diabetes mellitus by changes in  
52 lifestyle among subjects with impaired glucose tolerance. *New England Journal of Medicine*  
53 2001;**344**(18):1343-50
- 54 5. Costa B, Barrio F, Cabré JJ, et al. Delaying progression to type 2 diabetes among high-risk Spanish  
55 individuals is feasible in real-life primary healthcare settings using intensive lifestyle  
56 intervention. *Diabetologia* 2012:1-10 doi: 10.1007/s00125-012-2492-6  
57  
58  
59  
60

- 1
- 2
- 3 6. Samsudeen BS, Douglas A, Bhopal RS. Challenges in recruiting South Asians into prevention trials:  
4 Health professional and community recruiters' perceptions on the PODOSA trial. Public  
5 Health 2011;**125**(4):201-09 doi: <http://dx.doi.org/10.1016/j.puhe.2011.01.013>
- 6 7. Douglas A, Bhopal R, Bhopal R, et al. Recruiting South Asians to a lifestyle intervention trial:  
7 experiences and lessons from PODOSA (Prevention of Diabetes & Obesity in South Asians).  
8 Trials 2011;**12**(1):220
- 9 8. Penn L, Ryan V, White M. Feasibility, acceptability, and outcomes at 12 months follow-up of a  
10 novel community based intervention to prevent type 2 diabetes in adults at high risk: mixed  
11 methods pilot study. BMJ Open 2013
- 12 9. Penn L, Dombrowski SU, Sniehotta FF, et al. Participants' perspectives on making and maintaining  
13 behavioural changes in a lifestyle intervention for type 2 diabetes prevention: a qualitative  
14 study using the theory domain framework. BMJ Open 2013;**3**(6) doi: 10.1136/bmjopen-  
15 2013-002949
- 16 10. Penn L, Lordon J, Lowry R, et al. Towards the translation of research evidence to service  
17 provision: experience from North East England, UK. In: Peter Schwarz, ed. Diabetes  
18 Prevention in Practice. Dresden, 2010.
- 19 11. Neighbourhoods Statistical Release. The English Indices of Deprivation 2010. In: Department for  
20 Communities and Local Government, ed. <http://www.statistics.gov.uk>: Crown Copyright,  
21 2011.
- 22 12. Sport England. Active People Survey 1. Secondary Active People Survey 1 2007.  
23 <http://www.sportengland.org/>.
- 24 13. Lindstrom J, Tuomilehto J. The diabetes risk score: a practical tool to predict type 2 diabetes risk.  
25 Diabetes Care 2003;**26**(3):725-31
- 26 14. Kolb D A. *Experiential learning : experience as the source of learning and development*  
27 Englewood Cliffs, N.J. : Prentice-Hall 1984.
- 28 15. Office for National Statistics UK. Middlesbrough Local Authority. 2013.  
29 <http://www.neighbourhood.statistics.gov.uk>.
- 30 16. Liu J, Davidson E, Bhopal R, et al. Adapting health promotion interventions to meet the needs of  
31 ethnic minority groups: mixed-methods evidence synthesis. Health Technol Assess  
32 2012;**16**(44)
- 33 17. Netto G, Bhopal R, Lederle N, et al. How can health promotion interventions be adapted for  
34 minority ethnic communities? Five principles for guiding the development of behavioural  
35 interventions. Health Promotion International 2010;**25**(2):248-57
- 36 18. MRC (Medical Research Council UK). Developing and evaluating complex interventions: new  
37 guidance. 2008;  
38 <http://www.mrc.ac.uk/Utilities/Documentrecord/index.htm?d=MRC004871>.  
39 [www.mrc.ac.uk/complexinterventionsguidance](http://www.mrc.ac.uk/complexinterventionsguidance) (accessed 17/09/2013).
- 40 19. Davies M, Khunti K, Chauhan U, et al. The handbook for vascular risk assessment, risk reduction  
41 and risk management: University of Leicester, 2008.
- 42 20. Francis J, O'Connor D, Curran J. Theories of behaviour change synthesised into a set of  
43 theoretical groupings: introducing a thematic series on the theoretical domains framework.  
44 Implementation Science 2012;**7**(1):35
- 45 21. Ritchie J, Lewis J, editors. *Qualitative research practice: a guide for social science students and*  
46 *researchers*. London: Sage Publications, 2003.
- 47 22. QSR International. NVivo 9. 2012
- 48 23. Aspers P. Empirical Phenomenology: A Qualitative Research Approach (The Cologne Seminars).  
49 Indo-Pacific Journal of Phenomenology 2009;**9**(2)
- 50 24. Penn L, Lordon J, Lowry R, et al. Translating research evidence to service provision for prevention  
51 of type 2 diabetes: development and early outcomes of the 'New life, New you' intervention.,  
52 British Journal of Diabetes and Vascular Disease 2011;**11**(4):175 - 81
- 53
- 54
- 55
- 56
- 57
- 58
- 59
- 60

- 1
- 2
- 3 25. Community Interest Companies. Department for Business, Education and Skills,. 2013. (accessed
- 4 17/09/2013).
- 5 26. Absetz P, Valve R, Oldenburg B, et al. Type 2 diabetes prevention in the "real world": one-year
- 6 results of the GOAL Implementation Trial. *Diabetes Care* 2007;**30**(10):2465-70
- 7 27. Basu A, Meltzer D. Implications of spillover effects within the family for medical cost-
- 8 effectiveness analysis. *Journal of Health Economics* 2005;**24**(4):751-73
- 9 28. Falba TA, Sindelar JL. Spousal concordance in health behavior change. *Health Services Research*
- 10 2008;**43**(1 P1):96-116
- 11 29. Goebbels AFG, Lakerveld J, Ament AJHA, et al. Exploring non-health outcomes of health
- 12 promotion: The perspective of participants in a lifestyle behaviour change intervention.
- 13 *Health policy (Amsterdam, Netherlands)* 2012;**106**(2):177-86 doi:
- 14 <http://dx.doi.org/10.1016/j.healthpol.2012.04.005>.
- 15 30. Gorin AA, Wing RR, Fava JL, et al. Weight loss treatment influences untreated spouses and the
- 16 home environment: Evidence of a ripple effect. *International Journal of Obesity*
- 17 2008;**32**(11):1678-84
- 18
- 19
- 20
- 21
- 22
- 23
- 24
- 25
- 26
- 27
- 28
- 29
- 30
- 31
- 32
- 33
- 34
- 35
- 36
- 37
- 38
- 39
- 40
- 41
- 42
- 43
- 44
- 45
- 46
- 47
- 48
- 49
- 50
- 51
- 52
- 53
- 54
- 55
- 56
- 57
- 58
- 59
- 60

## Consolidated criteria for reporting qualitative studies (COREQ): 32-item checklist

Developed from:

Tong A, Sainsbury P, Craig J. Consolidated criteria for reporting qualitative research (COREQ): a 32-item checklist for interviews and focus groups. *International Journal for Quality in Health Care*. 2007. Volume 19, Number 6: pp. 349 – 357

| No. Item                                       | Guide questions/description                                                                                                                              | Reported on Page # |
|------------------------------------------------|----------------------------------------------------------------------------------------------------------------------------------------------------------|--------------------|
| <b>Domain 1: Research team and reflexivity</b> |                                                                                                                                                          |                    |
| <i>Personal Characteristics</i>                |                                                                                                                                                          |                    |
| 1. Inter viewer/facilitator                    | Which author/s conducted the inter view or focus group?                                                                                                  | 6                  |
| 2. Credentials                                 | What were the researcher's credentials?<br>E.g. PhD, MD                                                                                                  | 6                  |
| 3. Occupation                                  | What was their occupation at the time of the study?                                                                                                      | 6                  |
| 4. Gender                                      | Was the researcher male or female?                                                                                                                       | 6                  |
| 5. Experience and training                     | What experience or training did the researcher have?                                                                                                     | 6                  |
| <i>Relationship with participants</i>          |                                                                                                                                                          |                    |
| 6. Relationship established                    | Was a relationship established prior to study commencement?                                                                                              | 6                  |
| 7. Participant knowledge of the interviewer    | What did the participants know about the researcher? e.g. personal goals, reasons for doing the research                                                 | 6                  |
| 8. Interviewer characteristics                 | What characteristics were reported about the inter viewer/facilitator? e.g. Bias, assumptions, reasons and interests in the research topic               | 6                  |
| <b>Domain 2: study design</b>                  |                                                                                                                                                          |                    |
| <i>Theoretical framework</i>                   |                                                                                                                                                          |                    |
| 9. Methodological orientation and Theory       | What methodological orientation was stated to underpin the study? e.g. grounded theory, discourse analysis, ethnography, phenomenology, content analysis | 6                  |
| <i>Participant selection</i>                   |                                                                                                                                                          |                    |
| 10. Sampling                                   | How were participants selected? e.g. purposive, convenience, consecutive, snowball                                                                       | 6                  |
| 11. Method of approach                         | How were participants approached? e.g. face-to-face, telephone, mail, email                                                                              | 6                  |
| 12. Sample size                                | How many participants were in the study?                                                                                                                 | 7                  |
| 13. Non-participation                          | How many people refused to participate or dropped out? Reasons?                                                                                          | N/A                |
| <i>Setting</i>                                 |                                                                                                                                                          |                    |
| 14. Setting of data collection                 | Where was the data collected? e.g. home, clinic, workplace                                                                                               | 6                  |
| 15. Presence of non-participants               | Was anyone else present besides the participants and researchers?                                                                                        | 6                  |
| 16. Description of sample                      | What are the important characteristics of the sample? e.g. demographic data, date                                                                        | 7                  |

|    |                                        |                                                                                                                                 |        |
|----|----------------------------------------|---------------------------------------------------------------------------------------------------------------------------------|--------|
| 1  | <i>Data collection</i>                 |                                                                                                                                 |        |
| 2  | 17. Interview guide                    | Were questions, prompts, guides provided by the authors? Was it pilot tested?                                                   | 6      |
| 3  | 18. Repeat interviews                  | Were repeat inter views carried out? If yes, how many?                                                                          | No     |
| 4  | 19. Audio/visual recording             | Did the research use audio or visual recording to collect the data?                                                             | 6      |
| 5  | 20. Field notes                        | Were field notes made during and/or after the inter view or focus group?                                                        | 6      |
| 6  | 21. Duration                           | What was the duration of the inter views or focus group?                                                                        | 6      |
| 7  | 22. Data saturation                    | Was data saturation discussed?                                                                                                  | No     |
| 8  | 23. Transcripts returned               | Were transcripts returned to participants for comment and/or correction?                                                        | No     |
| 9  |                                        |                                                                                                                                 |        |
| 10 | <b>Domain 3: analysis and findings</b> |                                                                                                                                 |        |
| 11 | <i>Data analysis</i>                   |                                                                                                                                 |        |
| 12 | 24. Number of data coders              | How many data coders coded the data?                                                                                            | 7      |
| 13 | 25. Description of the coding tree     | Did authors provide a description of the coding tree?                                                                           | 7      |
| 14 | 26. Derivation of themes               | Were themes identified in advance or derived from the data?                                                                     | 7      |
| 15 | 27. Software                           | What software, if applicable, was used to manage the data?                                                                      | 7      |
| 16 | 28. Participant checking               | Did participants provide feedback on the findings?                                                                              | No     |
| 17 |                                        |                                                                                                                                 |        |
| 18 | <i>Reporting</i>                       |                                                                                                                                 |        |
| 19 | 29. Quotations presented               | Were participant quotations presented to illustrate the themes/findings? Was each quotation identified? e.g. participant number | 8 - 15 |
| 20 | 30. Data and findings consistent       | Was there consistency between the data presented and the findings?                                                              | N/A    |
| 21 | 31. Clarity of major themes            | Were major themes clearly presented in the findings?                                                                            | 8 - 15 |
| 22 | 32. Clarity of minor themes            | Is there a description of diverse cases or discussion of minor themes?                                                          | N/A    |

Once you have completed this checklist, please save a copy and upload it as part of your submission. When requested to do so as part of the upload process, please select the file type: *Checklist*. You will NOT be able to proceed with submission unless the checklist has been uploaded. Please DO NOT include this checklist as part of the main manuscript document. It must be uploaded as a separate file.



# BMJ Open

## PERSPECTIVES OF UK PAKISTANI WOMEN ON THEIR BEHAVIOUR CHANGE TO PREVENT TYPE 2 DIABETES: QUALITATIVE STUDY USING THE THEORY DOMAIN FRAMEWORK

|                                 |                                                                                                                                                                                                                                                                                                  |
|---------------------------------|--------------------------------------------------------------------------------------------------------------------------------------------------------------------------------------------------------------------------------------------------------------------------------------------------|
| Journal:                        | <i>BMJ Open</i>                                                                                                                                                                                                                                                                                  |
| Manuscript ID:                  | bmjopen-2013-004530.R1                                                                                                                                                                                                                                                                           |
| Article Type:                   | Research                                                                                                                                                                                                                                                                                         |
| Date Submitted by the Author:   | 27-May-2014                                                                                                                                                                                                                                                                                      |
| Complete List of Authors:       | Penn, Linda; Newcastle University, Institute of Health and Society<br>Dombrowski, Stephan; University of Stirling, School of Natural Sciences<br>Sniehotta, Falko; Newcastle University, Institute of Health and Society<br>White, Martin; Newcastle University, Institute of Health and Society |
| <b>Primary Subject Heading</b>: | Public health                                                                                                                                                                                                                                                                                    |
| Secondary Subject Heading:      | Diabetes and endocrinology, Health policy, Nutrition and metabolism,<br>Qualitative research, Research methods                                                                                                                                                                                   |
| Keywords:                       | General diabetes < DIABETES & ENDOCRINOLOGY, PREVENTIVE<br>MEDICINE, PUBLIC HEALTH, QUALITATIVE RESEARCH, HEALTH SERVICES<br>ADMINISTRATION & MANAGEMENT, Health policy < HEALTH SERVICES<br>ADMINISTRATION & MANAGEMENT                                                                         |
|                                 |                                                                                                                                                                                                                                                                                                  |

SCHOLARONE™  
Manuscripts

Only

1  
2  
3  
4 **PERSPECTIVES OF UK PAKISTANI WOMEN ON THEIR BEHAVIOUR CHANGE TO**  
5 **PREVENT TYPE 2 DIABETES: QUALITATIVE STUDY USING THE THEORY DOMAIN**  
6 **FRAMEWORK**  
7  
8

9  
10 Linda Penn,<sup>1,2</sup> Stephan U Dombrowski,<sup>3</sup> Falko F Sniehotta,<sup>1,2</sup> Martin White<sup>1,2</sup>

11  
12 <sup>1</sup> Institute of Health and Society, Newcastle University, Baddiley Clark Building, Richardson  
13 Road, Newcastle upon Tyne, NE2 4AX, UK.

14  
15 <sup>2</sup> Fuse, UKCRC Centre for Translational Research in Public Health

16  
17 <sup>3</sup> School of Natural Sciences, Division of Psychology, University of Stirling, FK9 4LA  
18  
19  
20  
21  
22  
23

24 Linda Penn, Research Associate (corresponding author): [linda.penn@ncl.ac.uk](mailto:linda.penn@ncl.ac.uk)

25  
26  
27 Stephan U Dombrowski, Lecturer in Health Psychology: [s.u.dombrowski@stir.ac.uk](mailto:s.u.dombrowski@stir.ac.uk)

28  
29  
30 Falko F Sniehotta, Reader in Health Psychology: [falko.sniehotta@ncl.ac.uk](mailto:falko.sniehotta@ncl.ac.uk)

31  
32 Martin White, Professor of Public Health: [martin.white@ncl.ac.uk](mailto:martin.white@ncl.ac.uk)  
33

34 **Key Words**

35 Behaviour change

36 Community

37 Cultural adaptation

38 Ethnicity

39 Intervention

40 Type 2 diabetes

41 Intervention

42 Pakistani

43 Physical activity

44 Prevention

45 South Asian

46 Qualitative

47 **Word count = words**  
48  
49  
50  
51  
52  
53  
54  
55  
56  
57  
58  
59  
60

## ABSTRACT

### Background

Type 2 diabetes (T2D) is a debilitating disease, highly prevalent in UK South Asians, and preventable by lifestyle intervention. The 'New life, New you' (NLNY) physical activity (PA) and dietary intervention for T2D prevention was culturally adapted to better engage minority ethnic populations and tested for feasibility.

### Objectives

To investigate Pakistani women participants' perspectives of their behaviour change and of salient intervention features.

### Setting

A community based eight-week programme of group delivered PA sessions with behavioural counselling and dietary advice, culturally adapted for ethnic minority populations, in an area of socioeconomic deprivation. Participants to NLNY were recruited through screening events in community venues across the town.

### Participants

Interviews were conducted with twenty Pakistani women NLNY participants, aged 26-45 (mean 33.5) years, from different parts of town.

### Results

Within the *a priori* TDF domains, (intentions and goals, reinforcement, knowledge, nature of the activity, social role and identity, social influences, capabilities and skills, regulation and decision, emotion, and environment), we identified the importance of social factors relating to participants' own PA and dietary behaviour change. We also identified cross-cutting themes as collateral benefits of the intervention including: participants' 'psychological health'; 'responsibility' (for others' health, especially family members included in the new PA and diet regimes); and 'inclusion' (an ethos of accommodating differences).

### Conclusions

Our findings suggest that culturally adapted interventions for Pakistani women at risk of T2D, delivered via group PA sessions with counselling and dietary advice, may encourage their PA and dietary behaviour change, and have collateral health and social benefits. The NLNY intervention appeared to be acceptable. We plan to evaluate recruitment, retention and likely effect of the intervention on participant behaviour prior to definitive evaluation.

## ARTICLE SUMMARY

### Article focus

The 'New life, New you' lifestyle intervention for diabetes prevention was culturally adapted for local Pakistani women and tested for feasibility. In an interview study we sought intervention participants' perspectives:

- On their behaviour change
- On the intervention procedures and cultural adaptations

### Key messages

- We identified the importance of several social factors, relating to participants' engagement in the intervention and their physical activity and dietary behaviour change
- Participants reported intervention benefits regarding their psychological health and positive affect
- Participants expressed responsibility for improving their family's lifestyle and the intention to apply learning from the intervention

### Strengths and limitations

This qualitative study:

- Highlighted cultural adaptations needed to engage Pakistani women in a lifestyle intervention
- Identified unanticipated intervention benefits
- Was limited by data collection early in the intervention timescale and the small study size

## BACKGROUND

Type 2 diabetes (T2D) is a debilitating disease that carries an increased risk of eye, kidney, nerve, and vascular disease with decreased life expectancy.[1] Prevalence of T2D is greater in UK residents of ethnic minority heritage than in the general UK population and the disease often occurs at an earlier age in these population groups.[2 3] Although there is good research evidence for the efficacy of lifestyle interventions for prevention of T2D,[4 5] translation of such evidence to service provision remains challenging. [6 7] The UK National Institute for Health and Care Excellence (NICE) guidance for risk identification and preventive interventions for high-risk individuals was published in July 2012.[1] This NICE guidance addresses the need to provide services, including risk assessment for those aged 25 to 39 who are not included in the National Health Service (NHS) Health Checks programme. The need to provide risk assessment and preventive opportunities for younger adults is particularly relevant for ethnic minorities.[1]

The 'New life, New you' (NLNY) intervention for primary prevention of T2D was developed in Middlesbrough and has to date been evaluated through a feasibility study.[10-12] According to UK government statistics, Middlesbrough ranks as one of the ten most deprived areas in England based on the index of multiple deprivation (IMD) ranks of localities defined as lower super output areas (LSOA) within the town.[13] The original NLNY intervention primarily targeted middle and older aged adults in low income groups, priority groups identified using market segmentation of the Sport England Active People survey.[14] The NLNY intervention was designed to be delivered in leisure and community settings and to recruit participants directly from the community, rather than relying on a health services referral route. Recruits to the NLNY intervention were assessed for individual risk of future T2D, using the Finnish diabetes risk score (FINDRISC).[15] The NLNY intervention promoted increased physical activity, healthy eating and weight loss, in line with the UK National Institute for Health and Care Excellence (NICE) guidance. The intervention was delivered through an eight week programme of weekly supervised physical activity sessions, each followed by reflection, behavioural counselling and advice,[16] with ongoing support and follow-up assessment at six and 12 months. Details of the original NLNY intervention feasibility study has been published.[10 12]

In Middlesbrough minority ethnic communities comprise about 9% of the total population. The South Asian community is well established in the town and in 2011 comprised about 6.1 % of the total population (8461 of a total population of 138,700).[17] Most of the South Asians in Middlesbrough are of Pakistani heritage, although there are also people of Indian and Bangladeshi heritage. Other ethnic groups in Middlesbrough include Black African and Chinese communities.

1  
2  
3 Although participants from ethnic minorities were not excluded from the original NLNY intervention,  
4 few were recruited. To better engage members of the local ethnic minority communities, we  
5 planned a cultural adaptation of the NLNY intervention.[18 19] The feasibility study for the adapted  
6 NLNY intervention is on-going. We are collecting recruitment data, including ethnicity and outcome  
7 data comprising weight and waist measurements along with self-report data on PA, diet, and quality  
8 of life at six and 12 months of follow-up in a before and after study.  
9

10  
11  
12  
13 Recruitment of South Asian participants to preventive interventions has proved difficult.[8] We  
14 anticipated that the cultural needs of Muslim women might deter their engagement in PA unless  
15 these needs were recognised and addressed. In this paper, we report a qualitative interview study  
16 that was conducted as part of the feasibility and acceptability evaluation of the adapted NLNY  
17 intervention, in line with the MRC guidance for the development and evaluation of complex  
18 interventions to improve health.[20] Women from the Pakistani community were early recruits to  
19 the adapted NLNY programme and this interview study was conducted at an early stage of the  
20 programme. We aimed to investigate Pakistani Women's perspectives of their behaviour change and  
21 salient features of the culturally adapted NLNY programme. We planned this investigation, along  
22 with other outcomes of the feasibility study, to subsequently inform the optimisation of the  
23 intervention via discussion with the commissioners. This feasibility assessment will also inform  
24 future options for a definitive evaluation of the adapted NLNY programme.  
25  
26  
27  
28  
29  
30  
31  
32

## 33 **METHODS**

34  
35 To develop the adapted intervention and its evaluation the NHS commissioners convened an  
36 operational group that included community health champions as well as health and fitness workers.  
37 The adapted NLNY intervention was informed by mapping the distribution of ethnic minority  
38 communities within the Local Authority area, followed by stakeholder consultations. The project  
39 delivery was managed by an NHS health improvement specialist. One adaptation of the NLNY  
40 intervention specifically targeted Pakistani women. As anticipated, and confirmed in stakeholder  
41 consultations, the main concern for local Pakistani women was the availability of culturally  
42 appropriate services.[21] Thus the need for single sex PA group sessions was of paramount  
43 importance in adapting the NLNY intervention for this population.  
44  
45  
46  
47  
48  
49  
50

## 51 **Intervention**

52 The intervention that was provided for the Pakistani women was delivered through a Community  
53 Interest Company (CIC). The CIC was founded and registered by three local women (two of Pakistani  
54 and one of Arabic heritage) who are directors of the company (NUR FITNESS CIC registration number  
55 08143445 <http://www.bis.gov.uk/cicregulator>). The intervention was delivered by one CIC founder  
56  
57  
58  
59  
60

1  
2  
3 member, who recruited other local Pakistani women to assist with intervention delivery. These  
4 women received training to qualify as fitness trainers or in some cases training to deliver the  
5 nutritional aspects of the intervention. The researcher and the project manager also provided  
6 training for the delivery staff that was specific to the NLNY intervention, including data collection  
7 procedures, use of behavioural change techniques and information regarding the relevant NICE  
8 guidance [1]. The NHS commissioners provided funding and facilitated these training opportunities.  
9

10  
11  
12  
13 Participants were recruited to the adapted NLNY intervention for Pakistani women through women-  
14 only assessment events that were organised by the project manager in consultation with the  
15 intervention delivery staff and community health champions (members of the community who have  
16 received training to promote health messages locally). These events took place in community venues  
17 in the areas of the town partly populated by the Pakistani community. Initial individual risk  
18 assessment was based on FINDRISC scores. [15] [22] Other data were collected at the assessment  
19 events, including self-report PA and dietary data. Follow-up assessments, as part of the service  
20 delivery and feasibility evaluation, were planned at six and 12 months.  
21

22  
23  
24  
25  
26  
27 Women recruited to the intervention took part in an eight week programme of weekly sessions,  
28 delivered to groups of between 10 and 20 women. The sessions and comprised approximately 60  
29 minutes of supervised group PA followed by 30 minutes of reflection and advice centred on dietary  
30 information and action planning. Participant received a booklet, written in English that included  
31 information, goal setting and action planning prompts with space for recording their progress. The  
32 information provided about a healthy diet was specifically tailored to the participant group,  
33 incorporating their preferred foods and cooking styles. The participants were also able to access  
34 additional PA sessions at different times of the week, delivered by the same provider (NUR FITNESS  
35 CIC). These additional sessions were made available to participants both alongside and following the  
36 eight week course. These sessions were provided at no cost to the participants for up to six months  
37 and later at low cost. Most of the activity sessions were delivered in community halls, including  
38 school halls. In the early stages of the programme the women had access to a community gym,  
39 where their exclusive use was assured for some mornings, but this facility was later closed.  
40

41  
42  
43  
44  
45  
46  
47  
48  
49 The provider ensured that information about different sessions was easily available and regularly  
50 updated. This was facilitated via a social networking page (i.e. Facebook) that the provider initiated;  
51 others relied on text messages, also from the provider, or accessed information by keeping in touch  
52 with other women participants.  
53  
54  
55  
56  
57  
58  
59  
60

### Design and participants

We obtained ethical approval for the study from Newcastle University Ethics Committee (Number 0447). All participants received information and gave written informed consent prior to taking part in the feasibility study and the interview study separately.

For the qualitative interview study we purposively sampled participants to ensure representation from the three different areas of the town where early recruitment and intervention delivery took place. The interviews were scheduled early in the feasibility study, shortly after the first groups of women, all of whom were Pakistani, had completed their eight week intervention programmes. The NLNY evaluation team did not have access to participant contact details so the interview invitations and arrangements were made by the intervention delivery staff following guidance from the research team. The researcher who conducted the interviews did not know any of the participants prior to the interviews. Our previous work [11] and the Theoretical Domains Framework (TDF), [23] a framework that groups component constructs from relevant behavioural theories into theoretical domains, were used to inform the topic guide for this study. The topic guide was refined as the interviews progressed.

### Data collection

Group interviews involving two or at most three participants were planned to encourage participation and these were conducted in English language by the female researcher (LP, MSc, Research Associate). Resources for an interpreter were not available. The interviews were conducted in the community venues where the participants attended their PA sessions and were conducted in parallel with on-going sessions although always in a separate room. Interviews lasted between 60 and 75 minutes. As in previous work, [11] we allowed flexibility within the areas outlined in the topic guide and the women were encouraged to report what mattered to them. Active listening with prompts was employed to provide clarification and improve insight. Notes were made of related topics introduced by the participants and the topic guide was developed as the interviews progressed. All interviews were audio-recorded and transcribed, as close to verbatim as possible by staff in the Institute of Health and Society at Newcastle University who have transcription expertise.

### Analysis

We used the Framework approach [24] for data analysis. Transcripts were read, checked, and imported into NVivo V9 [25] to facilitate coding. The themes emerging from the data were first classified according to the *a priori* theoretical domains identified from the TDF and included in the topic guide as: intentions and goals; reinforcement; knowledge; nature of the activity; social role and identity; social influences; capabilities and skills; behavioural regulation and decision; emotion; and



environment. LP performed the initial classification according to the TDF themes and these were then checked by SUD, differences being resolved through discussion. The use of NVivo software and the TDF defined *a priori* categories facilitated the analysis and promoted familiarisation with the data. Further analysis of the data within each of the theoretical domains, and reference to an empirical phenomenology approach, [26] which is primarily about retaining the appreciation of the respondents' subjective world, led to the identification and agreement of cross cutting constructs.

## RESULTS

We conducted nine interviews (seven dyad interviews and two interviews with groups of three participants). All 20 interview participants were recruited from among the first 78 female Pakistani intervention recruits in three areas of the town (Breckon Hill, Abingdon and Green Lane), with ages ranging from 26 to 45 years and a mean of 33.5 years. For this group of interview participants, their baseline risk of future T2D based on FINDRISC score ranged from 11 to 22 with a mean score of 15. Their English Index of Multiple Deprivation (IMD) scores, an ecological, composite measure based on routinely available data in seven categories of deprivation at the Lower Super Output Area (LSOA): a small administrative area with a population of about 1500) of residence from provided post-codes, ranged from 11 to 78 with a mean IMD score of 43 (which ranks among the most deprived English quintile). Details of participant characteristics are shown in Table 1.

Some women were less confident in their use of English language than others and the women tended to organise themselves so that the interview groups included at least one participant who was confident in her own ability to express herself in English. Sometimes the women would converse briefly between themselves in their first language to check their use of English. Those who were more confident tended to speak more, although this was sometimes to clarify what the other person had said for the benefit of the researcher, who only spoke English. Quotes are assigned to groups (Table 1) and where group discussion is reported we have used numerals (i, ii) to identify different speakers.

**Table 1: Participant baseline variables: group means**

| Group identifier | Number in the group | Age (years) | FINDRISC score | IMD score * |
|------------------|---------------------|-------------|----------------|-------------|
| A                | 2                   | 33          | 20             | 46          |
| B                | 2                   | 30          | 12.5           | 52          |
| C                | 2                   | 31          | 13             | 78          |
| D                | 3                   | 35          | 15             | 69          |
| E                | 2                   | 36          | 13             | 20.5        |

|                         |    |    |      |      |
|-------------------------|----|----|------|------|
| F                       | 2  | 40 | 14.5 | 37   |
| G                       | 3  | 32 | 14   | 18   |
| H                       | 2  | 29 | 14.5 | 29.6 |
| I                       | 2  | 45 | 17   | 34.5 |
| <b>All participants</b> | 20 | 34 | 15   | 43   |

\* a higher score indicates a higher level of deprivation

Within the *a priori* TDF domains, (intentions and goals, reinforcement, knowledge, nature of the activity, social role and identity, social influences, capabilities and skills, regulation and decision, emotion, and environment), we identified and analysed the anticipated theme relating to participants' own PA and dietary behaviours. We also identified three further cross-cutting themes which we have grouped as 'collateral health and social benefits'. These three composite themes related to participants' perspectives of (1) their psychological health, (2) their family role and responsibility for the health of others, and (3) an ethos of inclusion and accommodation of differences.

### **Participants own physical activity and dietary behaviours**

#### ***Intentions and goals***

Health concerns were frequently stated as a reason for taking part in the intervention and associated with an appreciation of the opportunity afforded by the availability of this intervention programme. There was an understanding of the increased diabetes risk associated with Asian ethnicity as described by one woman,

*'I just about got myself motivated that it's for health reasons ... especially with the diabetes... we as Asians, we get diabetes.'* (Group I).

Occasionally less explicitly health associated reasons would be mentioned such as,

*'Because we will gonna be like fit and we are gonna be smart and look nice.'* (Group C)

The intervention documentation was organised by the provider to promote action planning. Participants were encouraged to write an action plan for themselves for the next week (such as drink a glass of water instead of a fizzy drink at lunchtime). This planning was recalled as explained in this quotation,

*'Every week we give a self-challenge, we are not going to do this, we are not going to eat this, we are going to eat something else.'* (Group C).

1  
2  
3 More generally goal setting was closely related to being part of the group and the need to engage  
4 with group activities,  
5

6  
7 *'We have to go to the classes: we try our best to go to classes.'* (Group A).  
8

### 9 **Reinforcement**

10 Most of the reinforcement centred on feedback from other people, especially others in the group,  
11 for example,  
12

13  
14  
15 *'It was pointed out that I was getting more defined on my waist and that was like really brilliant.*

16  
17 *It was a great motivator.'* (Group F)  
18

### 19 **Knowledge**

20 Tailoring of dietary advice was much appreciated. There was frequent reporting of quantities of oil  
21 and salt to include in making home cooked curries, often introduced with an air of disbelief  
22 regarding how much oil and salt they had previously added to cooked food. They appreciated advice  
23 to reduce these quantities gradually so that the change in taste was less obvious, but they explained  
24 that as they became used to the different tastes they even preferred them.  
25  
26  
27

28  
29 Perhaps surprisingly the risk effect of family history needed clarification, as explained here,  
30

31  
32 *'I know my uncle in Pakistani, he's got diabetes and his leg is quite bad actually. I didn't know, I*  
33 *didn't realise I would be at risk, because he's an uncle, he's not my dad and then it was quite a bit*  
34 *of a shock when they said no actually he's part of your family.'* (Group E).  
35  
36

### 37 **Nature of the activity, capabilities and skills**

38 There was a range of experience within this group of women. Many were quite new to the physical  
39 activities that were presented in the programme and were gradually attuned to them by the  
40 trainers, as explained by one woman,  
41  
42

43  
44  
45 *'They proper explain it, they do exercise and they keep telling us as well both ways.'* (Group A)  
46

47 Generally the opportunity to participate in PA was valued and the women were pleased with what  
48 they had achieved. One woman described her effort and the beneficial effects she felt,  
49

50  
51 *'Trust me when I do work-out I'll be drenched, you know, and there's lots of ladies that really put*  
52 *the effort in, but it's like built your confidence.'* (Group G).  
53  
54  
55  
56  
57  
58  
59  
60

### ***Social role and identity, and Social influences***

These domains were particularly important for this group of Pakistani women and additionally contribute to the cross-cutting collateral benefits that we identified (detailed below). The women were mostly homemakers and mothers and often described themselves in relation to this role,

*'You put yourself back and you give your children more.'* (Group F).

The social responsibility to provide hospitality was sometimes seen as detrimental to their progress in achieving a healthy lifestyle,

*'I have to buy some unhealthy foods in, just because it's the norm, people expect something like that on the table and what happens is, if I bought it in I'll end up eating it myself.'* (Group F).

There was an expectation that the CIC providers would understand and accept the social and cultural issues that were pertinent to this participant group, because the delivery staff themselves were from the Muslim community as described by one woman,

*'Because she's [trainer] Asian as well, she knows how to change basically, she knows the things that Asians ...whereas English people have different diet to what Asians do, our diet is totally different, whereas she helped us a lot by telling us small changes that we could make in our daily intake of food and the like type of cooking that we could do.'*

The appreciation of the efforts that were being made by the CIC providers who were known to many of the women participants was evident. This was described by one interviewee,

*'I think [they are] helping our Asian community ladies, especially the oldies to come out [of the house]. ... They give her [the trainer] blessing.'* (Group D).

Recruitment by word of mouth was emphasised; people described how they had been encouraged to come by reassurance from those already engaged in the programme such as:

*'Friends are like encouraging you. 'no you have to come, you have to come,' just it helps socialising and get out as well, because you don't realise you can get out,'* (Group G), and *' it really helps to have someone saying actually it's ok to come,'* (Group B).

The women also described how later on they themselves had encouraged others and become 'champions' in promoting the intervention,

*'And then after I tell them it's really nice, come you see, it's really, really nice'* (Group B).

### **Regulation and decision**

Regulation centred on attending the PA sessions, where prompts to attend were naturally provided as part of the women's usual routine. For example after taking the children to school the women could attend a session in an adjacent community venue.

*'Every Monday we go, [to the activity session] like half nine till half ten,' (Group C).*

With regard to diet there was some appreciation of the need for portion size control, for example by using a smaller plate. Sweet fizzy drinks were perceived as addictive, therefore difficult to regulate and better avoided. The dietary advice offered included information about reading food labels, which was reported as helpful for making decisions about food choices. The fact that some sweet foods, specifically intended for Asian festivals, did not have nutrition labels was mentioned by some of the women participants.

### **Emotion**

Worry about the risk of diabetes, because of family members with the disease, and concern for relatives already suffering from diabetic complications was often mentioned, sometimes with regret for those who had not been able to make beneficial lifestyle changes. Retinopathy was specifically mentioned where it had affected younger aged relatives to the detriment of their quality of life.

There was also some mention of possible embarrassment about going to the gym, described as,

*'Making a fool of myself,' (Group E)*

In contrast the enjoyment experienced by participating in the activity sessions was often mentioned.

*'We have a good laugh and we have good things.'(Group C)*

*But then the time flies by, you don't realised where the time has gone and you had a workout, but you had a laugh.' (Group E)*

*It's the motivation of seeing each other and as well as having a laugh, you enjoy your time here.'*  
*(Group B)*

### **Environment**

The main environmental issue, as anticipated for this population group, was the provision of a female only facility. This is a broader criterion than just a single room, for example in a leisure centre, set aside for an hour. This requirement includes access to changing and toilet facilities with reassurance that the area would be securely restricted to women during the sessions and no man

1  
2  
3 would accidentally just walk in. There were also environmental issues of concern around the cold  
4 weather and the cost of attending sessions (once the free and subsidised period had expired).  
5  
6

7 *'It's so cold. At the moment I've stopped walking because it's cold. (Group A)*

8  
9 *'In the park all friends go together but sometimes I said I don't want to go 'it's too cold' (Group D)*

10  
11 *'You have to look at it from the financial point of view, how much is the charge going to be? If I*  
12 *want to come three times a week how much is that going to be? (Group F)*

13  
14  
15 *'Everything is expensive nowadays, just your basic household things cost an arm and a leg, so*  
16 *money is a big issue, but I think just for fitness the prices that they've got now are reasonable'*  
17  
18  
19 *(Group H)*

## 20 21 **Collateral health and social benefits**

### 22 23 **Psychological health**

24  
25 Participants' perspectives of their psychological health involve sub-themes relating to, 'safety and  
26 freedom' (cultural acceptance and feeling comfortable) and 'positive affect' (feeling happier, less  
27 isolated, and not depressed).  
28  
29

30  
31 Reference to Islamic culture used in engagement strategies was influential, as described by one  
32 participant,  
33

34  
35 *'The advert [Radio Ramadan] was talking Islamic, like people in Islam history, the women. In*  
36 *those days women were like quite fit and strong and they had to be and that's what got me in [to*  
37 *the programme] (Group D).*

38  
39  
40 Similar references were used by the community provider during the sessions and contributed to the  
41 perspectives of cultural acceptance that made the women comfortable,  
42  
43

44  
45 *'You know the instructor... and sometimes they talk in our own language and we just do jokes.'*  
46  
47 *(Group A)*

48  
49 Feeling safe and comfortable was a regular and much emphasised theme, as described clearly by  
50 members of one group,  
51

52  
53 *'i) It's easy for me to say, 'I'm going to a ladies only gym, there's no men there,' and I know there*  
54 *will be no disapproval from the male side of our family.*

55  
56 *ii) I felt like the whole mental pressure was lifted because I could justify to anyone that I am in an*  
57 *entirely female environment.*  
58  
59  
60

1  
2  
3 *i) He [husband] is in the mind that my wife is in a safe environment. ii) It is completely peaceful in*  
4 *mind. (Group F)*  
5  
6

7 The relief from anxiety was expressed by one participant as,

8  
9 *'You can just do exercise, you are not like wary - is anyone [male] suddenly going to walk through*  
10 *the door.'* (Group D)  
11  
12

13 Other aspects of feeling safe were about confidence to exercise. For example,

14  
15 *'That's what they teach you, 'listen to your own body', whatever your body allows you go to that*  
16 *speed and level. With me being a blood pressure patient..... Absolutely I found no fear, no worry*  
17 *and I was in a good safe environment.'* (Group F).  
18  
19  
20

21 The purposeful social grouping appeared to promote greater confidence within participants'  
22 perceived role: as described by one woman when talking about cooking for the family,  
23

24  
25 *'if you are the main cook then it's part of your role, if you got the knowledge [re: healthy food*  
26 *choices] (Group G)*  
27  
28

29 Another woman talked about cooking for her husband,

30  
31 *'When I go home I say, 'I'm going to cook and you are going to eat, this is how I am going to*  
32 *cook.' Husband was a bit like, you know, like it is -isn't it? 'Ah, you are not going to cook like that?'*  
33 *'Oh yes I am, but it will taste nice.'* (Group F).  
34  
35  
36

37 There were also explicit references to depression such as,

38  
39 *'She [relative] spent time at home a lot and I think a lot of depression got to her'* (Group E)  
40  
41

42 Two women in another group discussed depression in relation to the intervention and the difference  
43 participation in a social and active group made to them in comparison to their previous behaviours.  
44

45  
46 *'i) If you stay home all day obviously it's different isn't it? I was very, very lazy. I didn't used to go*  
47 *out. I just used to stay at home all the time.*  
48

49 *ii) Watch TV.*

50  
51 *i) Watch TV and just do the housework and just eat. Sit down in one place. So now I am very*  
52 *active. This year we got the choice to get depressed or to go out and get fresh'. (Group A).*  
53  
54  
55  
56  
57  
58  
59  
60

### Family role and responsibility for the health of others

The women's pivotal role within the family as the main cook was perceived as conveying a responsibility for their family's health that was often explained such as,

*'We have responsibility, we doing the shopping, we bring all the best things back for them' (Group D).*

In relation to this there were clear statements that the knowledge and support the women had received through the programme would empower them to make healthy changes for their own benefit with the added consequence of influencing other family and community members. One person clearly spoke about this as:

*'By educating the women I think what you are doing is you are empowering the women to sort of make decisions, informed decisions 'cos they know that, 'this is right', this is wrong'. Then they are in turn helping their younger, and extended elders.' (Group F)*

Similarly another woman described how her perception of responsibility had changed,

*'Now I go outside [of the house, to the sessions] I know what to do to my child you see. I want to give good things you know.' (Group D)*

A description of specific changes was supplied by another group,

*'We have stopped biscuits, we stopped cakes, we stopped crisps, we stopped everything, even we stopped white bread as well, we start brown bread and everything like brown rice.'*

This confidence to change extended to encouraging their children to exercise and even jokingly to the possibility that they might influence their husbands as explained in discussion with laughter by one group,

*'i) 'I wanna send mine [husband].  
ii) Yeah, I said to mine, 'Get out there'.  
i) They are jealous wasn't it, looking at us, and now, 'Look we [imagining husbands' speaking] need to work out.' (Group G).*

There was also an appreciation by the women of the way their own health would impact on others as explained in the following,

*'I'm the one that makes – does everything, if for some reason my health suffers then everyone else in our family suffers.' (Group E)*



### **An ethos of inclusion and accommodation of differences**

The Pakistani women within this group had a range of faith related preferences. A particular example was that some women did not want to participate in activities that involved music and the other women in the activity group were encouraged, by the trainer, to respect and accommodate these wishes so the issue was resolved. This issue and its resolution were reported by one or two groups,

*'Then [the trainer] said, 'No, they don't like music on' then [everyone] agree as well. They said, 'Oh you are so kind, because we don't like music.'* (Group C).

Although this intervention targeted ethnic minority participants, the additional PA sessions run by the community provider were open to other paying customers and attracted a few of the local women from the white population, who were welcomed as described by one woman,

*'Four white women were there and we had such a laugh with them as well, you know trying to speak our lingo and we were like, we tried like, the one that do speak English they are trying to say their words... we are having a laugh and everything'* (Group E).

This inclusivity was similarly described by another group,

*' i) The more the merrier and I think as long as it is women only it doesn't matter what ethnicity or what race or what age, we don't care .  
ii) I'm sure women from non-Muslim background they will probably feel intimidated by gyms anyway and they might find coming to a women only gym- Wow this is great!'* (Group F).

The women themselves even encouraged wider participation,

*'I've been recommending it to lots of Asians [and] English ladies, because they [all] like Bollywood music don't they?'* (Group G).

The appreciation of issues that would be common to all women was described by one group member as,

*'When women work together from different cultures we all find that we have the same fears, the same sort of issues about our bodies and how we want to look better'*(Group F) .

## **DISCUSSION**

### **Main findings**

1  
2  
3 The NLNY intervention is unusual in being centred on group delivered PA sessions. The Pakistani  
4 women's appreciation of the opportunity to engage in group delivered PA sessions in a culturally  
5 appropriate and socially supportive environment was an important finding. This qualitative study  
6 suggests that provision of culturally appropriate PA sessions will facilitate the engagement of  
7 Pakistani women and encourage their PA and dietary behaviour change. The study results emphasise  
8 the importance of social influences and the women's own perceived social role and identity for  
9 intervention development. The fact that the delivery staff were from the local Pakistani women's  
10 own community contributed to recruitment and engagement of the participants.

11  
12  
13  
14  
15  
16  
17 The engagement of Pakistani women in this culturally acceptable, social and proactively healthful  
18 context may have important health and social benefits in addition to those specifically intended by  
19 the intervention. We have described these unanticipated additional effects as 'collateral health and  
20 social benefits' and they comprise: a potential positive impact on the women's own psychological  
21 health including reduction in feelings of isolation and depression; improved knowledge and  
22 confidence with which to fulfil their perceived role as having responsibility for providing healthy food  
23 for their families and thus encouraging healthy lifestyles in their children; and an ethos of  
24 accommodation for the range of different cultural variation within local groups of women.

### 25 26 27 28 29 30 31 **Strengths and limitations**

32 This qualitative study was conducted quite early in the life of the intervention programme, when the  
33 women had been involved in the intervention for less than six months. It was not clear whether early  
34 enthusiasm for the intervention would be sustained. The interviews were conducted in English,  
35 which was not the participants' first language. Although participants could all speak some English  
36 and were able to translate for each other to an extent, the accuracy of these translations remains  
37 unclear. The small group, mostly dyadic, format for conducting the interviews, and the fact that they  
38 took place alongside intervention sessions that the women would usually be attending, facilitated  
39 study engagement. The disadvantage of this was that the interview rooms were not very quiet and  
40 so some of the recordings were difficult for the staff undertaking the transcriptions. We were able to  
41 call on an experienced staff team to ensure the transcriptions were as accurate as possible. The  
42 interview arrangements were made by the intervention delivery staff, which could mean some bias  
43 in the choice of respondents, although we accessed women from different areas of the town and we  
44 were aware of a diverse range of cultural differences among Pakistani women who participated. The  
45 researcher who conducted the interviews was not Pakistani and only spoke English; however, the  
46 interviewees were open and friendly, keen to communicate their views and to do so in a way that  
47 could be understood beyond their cultural group. The group of women who took part in the  
48 interview study were aged from 27 years to 45 years and most were under 40 years of age. This is  
49  
50  
51  
52  
53  
54  
55  
56  
57  
58  
59  
60

1  
2  
3 the younger age range of the typical target population for T2D prevention. We do not know how  
4 effective the intervention will be in attracting older women. There was some suggestion that these  
5 younger women might recruit older relations to take part in the intervention and it will be valuable  
6 to assess the recruitment age profile over time.  
7  
8

### 9 10 **Comparison with other studies and implications**

11 The NICE guidance for risk identification and provision of preventive interventions for high-risk  
12 individuals included recommendations for adults aged 25 to 39 of South Asian ethnicity, who are not  
13 included in the NHS Health Checks programme.[1] The findings from a recent National Institute for  
14 Health Research (NIHR) Health Technology Assessment evidence synthesis confirmed the  
15 importance of adapting health promotion interventions for ethnic minority communities and  
16 suggested that adaptation decisions should be based on detailed understanding of the target  
17 community.[18] Our plans for the adaptation of the NLNY intervention [12 27] to engage people  
18 from the local ethnic minority communities were therefore appropriate. The service commissioners  
19 took the lead in convening an operational group that included representation from the evaluation  
20 team. The commissioners were able to expand existing community links. Members of the local  
21 ethnic minority communities were invited to a dissemination seminar that was arranged to promote  
22 the NLNY intervention in its original format and invite interest in the adaptation.  
23  
24  
25  
26  
27  
28  
29  
30  
31

32 In the interview study reported here we sought to explore Pakistani female participants' views and  
33 we were able to draw on information from our qualitative evaluation within the original NLNY  
34 intervention.[11] As we experienced with the original NLNY intervention, community based  
35 recruitment was successful. The benefit of community based recruitment procedures was also  
36 experienced in the PODOSA trial.[9] The adapted NLNY intervention was unusual in being provided  
37 through a CIC.[28] It was evident that some of the women interviewed knew the intervention  
38 providers and that this positively affected their confidence and decision to participate.  
39  
40  
41  
42  
43

44 The social support engendered by the nature of the intervention was evident, as it was in the  
45 original NLNY intervention, and this reflects the more general literature around social support and  
46 behaviour change.[29] The social needs of this specific participant group to undertake various  
47 physical activities were of paramount importance for their engagement and confidence to become  
48 involved in the intervention. Whereas other interventions may be counselling based, NLNY  
49 incorporates group delivered PA in a central role. The provision of occasional female only sessions in  
50 local authority leisure centres does not constitute ideal provision of appropriate facilities (for  
51 example if the toilets are in common areas). In this feasibility phase the provision of staff training so  
52 that women from the Pakistani community could conduct PA sessions in appropriate and convenient  
53  
54  
55  
56  
57  
58  
59  
60

1  
2  
3 community venues, including school premises, was of immediate importance for the continued  
4 intervention delivery.  
5

6  
7 The identification of beneficial effects on other aspects of participants' own health that may result  
8 from their participation in PA intervention delivered in social groups and the 'spill over' effects of  
9 health promotion on other family members is supported by other evidence. [30-33] This additional  
10 benefit may have importance for health economic evaluation of interventions designed to promote  
11 increased PA, especially where these are delivered to groups that are organised to promote social  
12 support networks.  
13  
14  
15

### 16 17 **Unanswered questions and future research**

18  
19 The feasibility study of the adapted version of the NLNY intervention, which was planned to better  
20 engage members of the local ethnic minority communities, is on-going and we plan to analyse the  
21 recruitment, retention and outcomes at 12 months follow-up by sex and ethnic group. The entire  
22 feasibility study, together with our previous work relating to the original NLNY intervention[10] and  
23 the related qualitative studies, including the interview study reported here, [11] will inform plans for  
24 optimisation of the intervention and options for definitive evaluation of the NLNY intervention for  
25 effectiveness and cost effectiveness.  
26  
27  
28  
29  
30  
31  
32

### 33 **Acknowledgements**

34 We thank the participants in the adapted version of the New life, New you intervention, particularly  
35 those who gave their time for these interviews. We thank the project implementation team  
36 including NHS health promotion staff and intervention delivery staff, especially Claire Robinson and  
37 Shazia Noor.  
38  
39

### 40 **Funding**

41 Integral to the London 2012 Olympic and Paralympic Games was the aspiration that the Games  
42 would encourage more people across the UK to participate in physical activity. In the North East of  
43 England this Olympics vision and the regional health strategy provided the foundation for the 'New  
44 life, New you' intervention that was originally funded as a 2012 Olympic Legacy Project by a  
45 consortium including: Sport England, Middlesbrough Council, Middlesbrough Primary Care Trust, the  
46 North East Strategic Health Authority. The adapted version of the New life, New you intervention  
47 was designed to better engage the local ethnic minority community and funded by Middlesbrough  
48 Primary Care Trust. MW and FFS are funded in part by the British Heart Foundation, Cancer Research  
49 UK, the Economic and Social Research Council, Medical Research Council and National Institute of  
50 Health Research (NIHR) as director and senior investigator respectively of Fuse - the Centre for  
51 Translational Research in Public Health, which is a UKCRC Public Health Research Centre of  
52 Excellence. The funders had no role in study design, data collection and analysis, decision to publish,  
53 or preparation of the manuscript. The views expressed herein are those of the authors and not  
54 necessarily those of the above named funders or UKCRC.  
55  
56  
57  
58  
59  
60

## Abbreviations

CIC Community Interest Company

FINDRISC Finnish Diabetes Risk Score

IMD UK Government Statistics index of multiple deprivation

NICE UK National Institute for Health and Care Excellence

NLNY 'New life, New you' intervention

T2D Type 2 diabetes

TDF Theoretical Domains Framework of behaviour change

REPS UK Register of exercise professionals

## Authors' contributions

MW was a member of the Steering Group responsible securing funding and for the outline plan for the original NLNY intervention and evaluation. LP contributed to the development of the NLNY pilot intervention and designed the feasibility evaluation. Adaptation of the NLNY intervention was later planned to better engage local ethnic minority communities. This interview study was planned by LP as part of the evaluation of the adapted NLNY intervention. LP conducted the interviews. FFS, SUD and MW provided advice on the analysis. LP conducted the preliminary analysis which was then discussed and agreed with SUD. MW, FFS and SUD, reviewed, and contributed to the manuscript drafted by LP. All authors read and agreed the final version.

## Competing interests

The business case and outline plan for the original 'New life, New you' study was determined by a steering committee. This included representatives from members of the organisations that comprised the funding consortium as well as the Principal Investigator for the evaluation, co-author MW. The detailed development of the intervention was then progressed by a small operational team including the evaluation researcher, co-author LP. The adapted version of the New life, New you intervention was funded by Middlesbrough PCT. The funders had no role in the collection, analysis, and interpretation of data, the writing of the article and a decision to submit it for publication. Co-authors: MW, FS, SD and LP receive salaries from Newcastle University, Institute of Health and Society that provide open access funding for the publication. The authors declare that they have no other competing interests.

## Data sharing

No additional data available

## References

1. NICE. PH 38 Preventing type 2 diabetes - risk identification and interventions for individuals at high risk. 2012. <http://guidance.nice.org.uk/PH38> (accessed 17/09/2013).
2. Forouhi NG, Merrick D, Goyder E, et al. Diabetes prevalence in England, 2001—estimates from an epidemiological model. *Diabetic Medicine* 2006;**23**(2):189-97 doi: 10.1111/j.1464-5491.2005.01787.x[published Online First: Epub Date]].
3. Pollard TM. Ethnic Groups as Migrant Groups: Improving Understanding of Links Between Ethnicity/Race and Risk of Type 2 Diabetes and Associated Conditions\*. *Annual Review of Anthropology* 2011;**40**(1):145-58 doi: doi:10.1146/annurev-anthro-081309-145719[published Online First: Epub Date]].
4. Knowler WC, Barrett-Connor E, Fowler SE, et al. Reduction in the incidence of type 2 diabetes with lifestyle intervention or metformin. *N Engl J Med* 2002;**346**(6):393-403
5. Tuomilehto J, Lindstrom J, Eriksson JG, et al. Prevention of type 2 diabetes mellitus by changes in lifestyle among subjects with impaired glucose tolerance. *N Engl J Med* 2001;**344**(18):1343-50
6. Costa B, Barrio F, Cabré JJ, et al. Delaying progression to type 2 diabetes among high-risk Spanish individuals is feasible in real-life primary healthcare settings using intensive lifestyle intervention. *Diabetologia* 2012:1-10 doi: 10.1007/s00125-012-2492-6[published Online First: Epub Date]].
7. Jain SH, Horton ES, (Editors) KK. Advancing the Science and Practice of Diabetes Prevention. *American Journal of Preventive Medicine* 2013; **44**,(4 Supplement 4):A1-A4, S297-S400
8. Samsudeen BS, Douglas A, Bhopal RS. Challenges in recruiting South Asians into prevention trials: Health professional and community recruiters' perceptions on the PODOSA trial. *Public Health* 2011;**125**(4):201-09 doi: <http://dx.doi.org/10.1016/j.puhe.2011.01.013>[published Online First: Epub Date]].
9. Douglas A, Bhopal R, Bhopal R, et al. Recruiting South Asians to a lifestyle intervention trial: experiences and lessons from PODOSA (Prevention of Diabetes & Obesity in South Asians). *Trials* 2011;**12**(1):220
10. Penn L, Ryan V, White M. Feasibility, acceptability, and outcomes at 12 months follow-up of a novel community based intervention to prevent type 2 diabetes in adults at high risk: mixed methods pilot study. *BMJ Open* 2013
11. Penn L, Dombrowski SU, Sniehotta FF, et al. Participants' perspectives on making and maintaining behavioural changes in a lifestyle intervention for type 2 diabetes prevention: a qualitative study using the theory domain framework. *BMJ Open* 2013;**3**(6) doi: 10.1136/bmjopen-2013-002949[published Online First: Epub Date]].
12. Penn L, Lordon J, Lowry R, et al. Towards the translation of research evidence to service provision: experience from North East England, UK. In: Peter Schwarz, ed. *Diabetes Prevention in Practice*. Dresden, 2010.
13. Neighbourhoods Statistical Release. The English Indices of Deprivation 2010. In: Department for Communities and Local Government, ed. <http://www.statistics.gov.uk>: Crown Copyright, 2011.
14. Sport England. Active People Survey 1. Secondary Active People Survey 1 2007. <http://www.sportengland.org/>.
15. Lindstrom J, Tuomilehto J. The diabetes risk score: a practical tool to predict type 2 diabetes risk. *Diabetes Care* 2003;**26**(3):725-31
16. Kolb D A. *Experiential learning : experience as the source of learning and development* Englewood Cliffs, N.J. : Prentice-Hall 1984.
17. Office for National Statistics UK. Middlesbrough Local Authority. 2013. <http://www.neighbourhood.statistics.gov.uk>.

18. Liu J, Davidson E, Bhopal R, et al. Adapting health promotion interventions to meet the needs of ethnic minority groups: mixed-methods evidence synthesis. *Health Technol Assess* 2012;**16**(44)
19. Netto G, Bhopal R, Lederle N, et al. How can health promotion interventions be adapted for minority ethnic communities? Five principles for guiding the development of behavioural interventions. *Health Promotion International* 2010;**25**(2):248-57
20. MRC (Medical Research Council UK). Developing and evaluating complex interventions: new guidance. 2008; <http://www.mrc.ac.uk/Utilities/Documentrecord/index.htm?d=MRC004871>. [www.mrc.ac.uk/complexinterventionsguidance](http://www.mrc.ac.uk/complexinterventionsguidance) (accessed 17/09/2013).
21. Babakus W, Thompson J. Physical activity among South Asian women: a systematic, mixed-methods review. *International Journal of Behavioral Nutrition and Physical Activity* 2012;**9**(1):150
22. Davies M, Khunti K, Chauhan U, et al. The handbook for vascular risk assessment, risk reduction and risk management: University of Leicester, 2008.
23. Francis J, O'Connor D, Curran J. Theories of behaviour change synthesised into a set of theoretical groupings: introducing a thematic series on the theoretical domains framework. *Implementation Science* 2012;**7**(1):35
24. Ritchie J, Lewis J, editors. *Qualitative research practice: a guide for social science students and researchers*. London: Sage Publications, 2003.
25. QSRInternational. NVivo 9. 2012
26. Aspers P. Empirical Phenomenology: A Qualitative Research Approach (The Cologne Seminars). *Indo-Pacific Journal of Phenomenology* 2009;**9**(2)
27. Penn L, Lordon J, Lowry R, et al. Translating research evidence to service provision for prevention of type 2 diabetes: development and early outcomes of the 'New life, New you' intervention. *British Journal of Diabetes and Vascular Disease* 2011;**11**(4):175 - 81
28. Community Interest Companies. Department for Business, Education and Skills. 2013. (accessed 17/09/2013).
29. Absetz P, Valve R, Oldenburg B, et al. Type 2 diabetes prevention in the "real world": one-year results of the GOAL Implementation Trial. *Diabetes Care* 2007;**30**(10):2465-70
30. Basu A, Meltzer D. Implications of spillover effects within the family for medical cost-effectiveness analysis. *Journal of Health Economics* 2005;**24**(4):751-73
31. Falba TA, Sindelar JL. Spousal concordance in health behavior change. *Health Services Research* 2008;**43**(1 P1):96-116
32. Goebbels AFG, Lakerveld J, Ament AJHA, et al. Exploring non-health outcomes of health promotion: The perspective of participants in a lifestyle behaviour change intervention. *Health Policy* 2012;**106**(2):177-86 doi: <http://dx.doi.org/10.1016/j.healthpol.2012.04.005>[published Online First: Epub Date].
33. Gorin AA, Wing RR, Fava JL, et al. Weight loss treatment influences untreated spouses and the home environment: Evidence of a ripple effect. *International Journal of Obesity* 2008;**32**(11):1678-84

1  
2  
3  
4 **PERSPECTIVES OF UK PAKISTANI WOMEN ON THEIR BEHAVIOUR CHANGE TO**  
5 **PREVENT TYPE 2 DIABETES: QUALITATIVE STUDY USING THE THEORY DOMAIN**  
6 **FRAMEWORK**  
7  
8

9  
10 Linda Penn,<sup>1,2</sup> Stephan U Dombrowski,<sup>3</sup> Falko F Sniehotta,<sup>1,2</sup> Martin White<sup>1,2</sup>

11  
12 <sup>1</sup> Institute of Health and Society, Newcastle University, Baddiley Clark Building, Richardson  
13 Road, Newcastle upon Tyne, NE2 4AX, UK.  
14

15  
16 <sup>2</sup> Fuse, UKCRC Centre for Translational Research in Public Health  
17

18  
19 <sup>3</sup> School of Natural Sciences, Division of Psychology, University of Stirling, FK9 4LA  
20  
21

22  
23  
24 Linda Penn, Research Associate (corresponding author): [linda.penn@ncl.ac.uk](mailto:linda.penn@ncl.ac.uk)  
25

26  
27 Stephan U Dombrowski, Lecturer in Health Psychology: [s.u.dombrowski@stir.ac.uk](mailto:s.u.dombrowski@stir.ac.uk)  
28

29  
30 Falko F Sniehotta, Reader in Health Psychology: [falko.sniehotta@ncl.ac.uk](mailto:falko.sniehotta@ncl.ac.uk)  
31

32  
33 Martin White, Professor of Public Health: [martin.white@ncl.ac.uk](mailto:martin.white@ncl.ac.uk)  
34

35 **Key Words**

36 Behaviour change

37 Community

38 Cultural adaptation

39 Ethnicity

40 Intervention

41 Type 2 diabetes

42 Intervention

43 Pakistani

44 Physical activity

45 Prevention

46 South Asian

47 Qualitative

48 **Word count = words**  
49  
50  
51  
52  
53  
54  
55  
56  
57  
58  
59  
60



## ABSTRACT

### Background

Type 2 diabetes (T2D) is a debilitating disease, highly prevalent in UK South Asians, and preventable by lifestyle intervention. The 'New life, New you' (NLNY) physical activity (PA) and dietary intervention for T2D prevention was culturally adapted to better engage minority ethnic populations and tested for feasibility.

### Objectives

To investigate Pakistani women participants' perspectives of their behaviour change and of salient intervention features.

### Setting

A community based eight-week programme of group delivered PA sessions with behavioural counselling and dietary advice, culturally adapted for ethnic minority populations, in an area of socioeconomic deprivation. Participants to NLNY were recruited through screening events in community venues across the town.

### Participants

Participants Interviews were conducted with twenty Pakistani women NLNY participants, aged 26-45 (mean 33.5) years, from different parts of town.

### Results

Within the *a priori* TDF domains, (intentions and goals, reinforcement, knowledge, nature of the activity, social role and identity, social influences, capabilities and skills, regulation and decision, emotion, and environment), we identified the importance of social factors relating to participants' own PA and dietary behaviour change. We also identified cross-cutting themes as collateral benefits of the intervention including: participants' 'psychological health'; 'responsibility' (for others' health, especially family members included in the new PA and diet regimes); and 'inclusion' (an ethos of accommodating differences).

### Conclusions

Our findings suggest that culturally adapted interventions for Pakistani women at risk of T2D, delivered via group PA sessions with counselling and dietary advice, may encourage their PA and dietary behaviour change, and have collateral health and social benefits. The NLNY intervention appeared to be acceptable. We plan to evaluate recruitment, retention and likely effect of the intervention on participant behaviour prior to definitive evaluation.

## ARTICLE SUMMARY

### Article focus

The 'New life, New you' lifestyle intervention for diabetes prevention was culturally adapted for local Pakistani women and tested for feasibility. In an interview study we sought intervention participants' perspectives:

- On their behaviour change
- On the intervention procedures and cultural adaptations

### Key messages

- We identified the importance of several social factors, relating to participants' engagement in the intervention and their physical activity and dietary behaviour change
- Participants reported intervention benefits regarding their psychological health and positive affect
- Participants expressed responsibility for improving their family's lifestyle and the intention to apply learning from the intervention

### Strengths and limitations

This qualitative study:

- Highlighted cultural adaptations needed to engage Pakistani women in a lifestyle intervention
- Identified unanticipated intervention benefits
- Was limited by data collection early in the intervention timescale and the small study size

## BACKGROUND

Type 2 diabetes (T2D) is a debilitating disease that carries an increased risk of eye, kidney, nerve, and vascular disease with decreased life expectancy.[1] Prevalence of T2D is greater in UK residents of ethnic minority heritage than in the general UK population and the disease often occurs at an earlier age in these population groups.[2 3] Although there is good research evidence for the efficacy of lifestyle interventions for prevention of T2D,[4 5] translation of such evidence to service provision remains challenging. [6 7] The UK National Institute for Health and Care Excellence (NICE) guidance for risk identification and preventive interventions for high-risk individuals was published in July 2012.[1] This NICE guidance addresses the need to provide services, including risk assessment for those aged 25 to 39 who are not included in the National Health Service (NHS) Health Checks

1  
2  
3 programme. The need to provide risk assessment and preventive opportunities for younger adults is  
4 particularly relevant for ethnic minorities.[1]

5  
6  
7 The 'New life, New you' (NLNY) intervention for primary prevention of T2D was developed in  
8 Middlesbrough and has to date been evaluated through a feasibility study.[10-12] According to UK  
9 government statistics, Middlesbrough ranks as one of the ten most deprived areas in England based  
10 on the index of multiple deprivation (IMD) ranks of localities defined as lower super output areas  
11 (LSOA) within the town.[13] The original NLNY intervention primarily targeted middle and older aged  
12 adults in low income groups, priority groups identified using market segmentation of the Sport  
13 England Active People survey.[14] The NLNY intervention was designed to be delivered in leisure and  
14 community settings and to recruit participants directly from the community, rather than relying on a  
15 health services referral route. Recruits to the NLNY intervention were assessed for individual risk of  
16 future T2D, using the Finnish diabetes risk score (FINDRISC).[15] The NLNY intervention promoted  
17 increased physical activity, healthy eating and weight loss, in line with the UK National Institute for  
18 Health and Care Excellence (NICE) guidance. The intervention was delivered through an eight week  
19 programme of weekly supervised physical activity sessions, each followed by reflection, behavioural  
20 counselling and advice,[16] with ongoing support and follow-up assessment at six and 12 months.  
21 Details of the original NLNY intervention feasibility study has been published.[10 12]

22  
23  
24 In Middlesbrough minority ethnic communities comprise about 9% of the total population. The  
25 South Asian community is well established in the town and in 2011 comprised about 6.1 % of the  
26 total population (8461 of a total population of 138,700).[17] Most of the South Asians in  
27 Middlesbrough are of Pakistani heritage, although there are also people of Indian and Bangladeshi  
28 heritage. Other ethnic groups in Middlesbrough include Black African and Chinese communities.

29  
30  
31 Although participants from ethnic minorities were not excluded from the original NLNY intervention,  
32 few were recruited. To better engage members of the local ethnic minority communities, we  
33 planned a cultural adaptation of the NLNY intervention.[18 19] The feasibility study for the adapted  
34 NLNY intervention is on-going. We are collecting recruitment data, including ethnicity and outcome  
35 data comprising weight and waist measurements along with self-report data on PA, diet, and quality  
36 of life at six and 12 months of follow-up in a before and after study.

37  
38  
39 Recruitment of South Asian participants to preventive interventions has proved difficult.[8] We  
40 anticipated that the cultural needs of Muslim women might deter their engagement in PA unless  
41 these needs were recognised and addressed. In this paper, we report a qualitative interview study  
42 that was conducted as part of the feasibility and acceptability evaluation of the adapted NLNY  
43 intervention, in line with the MRC guidance for the development and evaluation of complex  
44  
45  
46  
47  
48  
49  
50  
51  
52  
53  
54  
55  
56  
57  
58  
59  
60

1  
2  
3 interventions to improve health.[20] Women from the Pakistani community were early recruits to  
4 the adapted NLNY programme and this interview study was conducted at an early stage of the  
5 programme. We aimed to investigate Pakistani Women's perspectives of their behaviour change and  
6 salient features of the culturally adapted NLNY programme. We planned this investigation, along  
7 with other outcomes of the feasibility study, to subsequently inform the optimisation of the  
8 intervention via discussion with the commissioners. This feasibility assessment will also inform  
9 future options for a definitive evaluation of the adapted NLNY programme.  
10  
11  
12  
13

## 14 15 METHODS

16  
17 To develop the adapted intervention and its evaluation the NHS commissioners convened an  
18 operational group that included community health champions as well as health and fitness workers.  
19 The adapted NLNY intervention was informed by mapping the distribution of ethnic minority  
20 communities within the Local Authority area, followed by stakeholder consultations. The project  
21 delivery was managed by an NHS health improvement specialist. One adaptation of the NLNY  
22 intervention specifically targeted Pakistani women. As anticipated, and confirmed in stakeholder  
23 consultations, the main concern for local Pakistani women was the availability of culturally  
24 appropriate services.[21] Thus the need for single sex PA group sessions was of paramount  
25 importance in adapting the NLNY intervention for this population.  
26  
27  
28  
29  
30  
31

### 32 Intervention

33  
34 The intervention that was provided for the Pakistani women was delivered through a Community  
35 Interest Company (CIC). The CIC was founded and registered by three local women (two of Pakistani  
36 and one of Arabic heritage) who are directors of the company (NUR FITNESS CIC registration number  
37 08143445 <http://www.bis.gov.uk/cicregulator>). The intervention was delivered by one CIC founder  
38 member, who recruited other local Pakistani women to assist with intervention delivery. These  
39 women received training to qualify as fitness trainers or in some cases training to deliver the  
40 nutritional aspects of the intervention. The researcher and the project manager also provided  
41 training for the delivery staff that was specific to the NLNY intervention, including data collection  
42 procedures, use of behavioural change techniques and information regarding the relevant NICE  
43 guidance [1]. The NHS commissioners provided funding and facilitated these training opportunities.  
44  
45  
46  
47  
48  
49  
50

51 Participants were recruited to the adapted NLNY intervention for Pakistani women through women-  
52 only assessment events that were organised by the project manager in consultation with the  
53 intervention delivery staff and community health champions (members of the community who have  
54 received training to promote health messages locally). These events took place in community venues  
55 in the areas of the town partly populated by the Pakistani community. Initial individual risk  
56  
57  
58  
59  
60

1  
2  
3 assessment was based on FINDRISC scores. [15] [22] Other data were collected at the assessment  
4 events, including self-report PA and dietary data. Follow-up assessments, as part of the service  
5 delivery and feasibility evaluation, were planned at six and 12 months.  
6  
7

8  
9 Women recruited to the intervention took part in an eight week programme of weekly sessions,  
10 delivered to groups of between 10 and 20 women. The sessions and comprised approximately 60  
11 minutes of supervised group PA followed by 30 minutes of reflection and advice centred on dietary  
12 information and action planning. Participant received a booklet, **written in English** that included  
13 information, goal setting and action planning prompts with space for recording their progress. The  
14 information provided about a healthy diet was specifically tailored to the participant group,  
15 incorporating their preferred foods and cooking styles. The participants were also able to access  
16 additional PA sessions at different times of the week, delivered by the same provider **(NUR FITNESS  
17 CIC)**. These additional sessions were made available to participants both alongside and following the  
18 eight week course. These sessions were provided at no cost to the participants for up to six months  
19 and later at low cost. Most of the activity sessions were delivered in community halls, including  
20 school halls. In the early stages of the programme the women had access to a community gym,  
21 where their exclusive use was assured for some mornings, but this facility was later closed.  
22  
23  
24  
25  
26  
27  
28  
29

30 The provider ensured that information about different sessions was easily available and regularly  
31 updated. This was facilitated via a social networking page (i.e. Facebook) that the provider initiated;  
32 others relied on text messages, also from the provider, **or accessed information by keeping in touch  
33 with other women participants.**  
34  
35  
36  
37

### 38 **Design and participants**

39 We obtained ethical approval for the study from Newcastle University Ethics Committee **(Number  
40 0447)**. All participants received information and gave written informed consent prior to taking part  
41 in the feasibility study and the interview study separately.  
42  
43  
44

45 For the qualitative interview study we purposively sampled participants to ensure representation  
46 from the three different areas of the town where early recruitment and intervention delivery took  
47 place. The interviews were scheduled **early in the feasibility study**, shortly after the first groups of  
48 women, **all of whom were Pakistani**, had completed their eight week intervention programmes. The  
49 NLNY evaluation team did not have access to participant contact details so the interview invitations  
50 and arrangements were made by the intervention delivery staff following guidance from the  
51 research team. The researcher who conducted the interviews did not know any of the participants  
52 prior to the interviews. Our previous work [11] and the Theoretical Domains Framework (TDF), [23] a  
53 framework that groups component constructs from relevant behavioural theories into theoretical  
54  
55  
56  
57  
58  
59  
60

1  
2  
3 domains, were used to inform the topic guide for this study. The topic guide was refined as the  
4 interviews progressed.  
5  
6

### 7 **Data collection**

8 Group interviews involving two or at most three participants were planned to encourage  
9 participation and these were conducted in English language by the female researcher (LP, MSc,  
10 Research Associate). Resources for an interpreter were not available. The interviews were  
11 conducted in the community venues where the participants attended their PA sessions and were  
12 conducted in parallel with on-going sessions although always in a separate room. Interviews lasted  
13 between 60 and 75 minutes. As in previous work,[11] we allowed flexibility within the areas outlined  
14 in the topic guide and the women were encouraged to report what mattered to them. Active  
15 listening with prompts was employed to provide clarification and improve insight. Notes were made  
16 of related topics introduced by the participants and the topic guide was developed as the interviews  
17 progressed. All interviews were audio-recorded and transcribed, as close to verbatim as possible by  
18 staff in the Institute of Health and Society at Newcastle University who have transcription expertise.  
19  
20  
21  
22  
23  
24  
25  
26

### 27 **Analysis**

28 We used the Framework approach[24] for data analysis. Transcripts were read, checked, and  
29 imported into NVivo V9 [25] to facilitate coding. The themes emerging from the data were first  
30 classified according to the *a priori* theoretical domains identified from the TDF and included in the  
31 topic guide as: intentions and goals; reinforcement; knowledge; nature of the activity; social role and  
32 identity; social influences; capabilities and skills; behavioural regulation and decision; emotion; and  
33 environment. LP performed the initial classification according to the TDF themes and these were  
34 then checked by SUD, differences being resolved through discussion. The use of NVivo software and  
35 the TDF defined *a priori* categories facilitated the analysis and promoted familiarisation with the  
36 data. Further analysis of the data within each of the theoretical domains, and reference to an  
37 empirical phenomenology approach, [26] which is primarily about retaining the appreciation of the  
38 respondents' subjective world, led to the identification and agreement of cross cutting constructs.  
39  
40  
41  
42  
43  
44  
45  
46

### 47 **RESULTS**

48 We conducted nine interviews (seven dyad interviews and two interviews with groups of three  
49 participants). All 20 interview participants were recruited from among the first 78 female Pakistani  
50 intervention recruits in three areas of the town (Breckon Hill, Abingdon and Green Lane), with ages  
51 ranging from 26 to 45 years and a mean of 33.5 years. For this group of interview participants, their  
52 baseline risk of future T2D based on FINDRISC score ranged from 11 to 22 with a mean score of 15.  
53 Their English Index of Multiple Deprivation (IMD) scores, an ecological, composite measure based on  
54  
55  
56  
57  
58  
59  
60

routinely available data in seven categories of deprivation at the Lower Super Output Area (LSOA): a small administrative area with a population of about 1500) of residence from provided post-codes, ranged from 11 to 78 with a mean IMD score of 43 (which ranks among the most deprived English quintile). Details of participant characteristics are shown in Table 1.

Some women were less confident in their use of English language than others and the women tended to organise themselves so that the interview groups included at least one participant who was confident in her own ability to express herself in English. Sometimes the women would converse briefly between themselves in their first language to check their use of English. Those who were more confident tended to speak more, although this was sometimes to clarify what the other person had said for the benefit of the researcher, who only spoke English. Quotes are assigned to groups (Table 1) and where group discussion is reported we have used numerals (i, ii) to identify different speakers.

**Table 1: Participant baseline variables: group means**

| Group identifier        | Number in the group | Age (years) | FINDRISC score | IMD score * |
|-------------------------|---------------------|-------------|----------------|-------------|
| A                       | 2                   | 33          | 20             | 46          |
| B                       | 2                   | 30          | 12.5           | 52          |
| C                       | 2                   | 31          | 13             | 78          |
| D                       | 3                   | 35          | 15             | 69          |
| E                       | 2                   | 36          | 13             | 20.5        |
| F                       | 2                   | 40          | 14.5           | 37          |
| G                       | 3                   | 32          | 14             | 18          |
| H                       | 2                   | 29          | 14.5           | 29.6        |
| I                       | 2                   | 45          | 17             | 34.5        |
| <b>All participants</b> | 20                  | 34          | 15             | 43          |

\* a higher score indicates a higher level of deprivation

Within the *a priori* TDF domains, (intentions and goals, reinforcement, knowledge, nature of the activity, social role and identity, social influences, capabilities and skills, regulation and decision, emotion, and environment), we identified and analysed the anticipated theme relating to participants' own PA and dietary behaviours. We also identified three further cross-cutting themes which we have grouped as 'collateral health and social benefits'. These three composite themes related to participants' perspectives of (1) their psychological health, (2) their family role and

responsibility for the health of others, and (3) an ethos of inclusion and accommodation of differences.

## Participants own physical activity and dietary behaviours

### *Intentions and goals*

Health concerns were frequently stated as a reason for taking part in the intervention and associated with an appreciation of the opportunity afforded by the availability of this intervention programme. There was an understanding of the increased diabetes risk associated with Asian ethnicity as described by one woman,

*'I just about got myself motivated that it's for health reasons ... especially with the diabetes... we as Asians, we get diabetes.'* (Group I).

Occasionally less explicitly health associated reasons would be mentioned such as,

*'Because we will gonna be like fit and we are gonna be smart and look nice.'* (Group C)

The intervention documentation was organised by the provider to promote action planning. Participants were encouraged to write an action plan for themselves for the next week (such as drink a glass of water instead of a fizzy drink at lunchtime). This planning was recalled as explained in this quotation,

*'Every week we give a self-challenge, we are not going to do this, we are not going to eat this, we are going to eat something else.'* (Group C).

More generally goal setting was closely related to being part of the group and the need to engage with group activities,

*'We have to go to the classes: we try our best to go to classes.'* (Group A).

### *Reinforcement*

Most of the reinforcement centred on feedback from other people, especially others in the group, for example,

*'It was pointed out that I was getting more defined on my waist and that was like really brilliant. It was a great motivator.'* (Group F)

### *Knowledge*

Tailoring of dietary advice was much appreciated. There was frequent reporting of quantities of oil and salt to include in making home cooked curries, often introduced with an air of disbelief



1  
2  
3 regarding how much oil and salt they had previously added to cooked food. They appreciated advice  
4 to reduce these quantities gradually so that the change in taste was less obvious, but they explained  
5 that as they became used to the different tastes they even preferred them.  
6  
7

8 Perhaps surprisingly the risk effect of family history needed clarification, as explained here,  
9

10  
11 *'I know my uncle in Pakistani, he's got diabetes and his leg is quite bad actually. I didn't know, I*  
12 *didn't realise I would be at risk, because he's an uncle, he's not my dad and then it was quite a bit*  
13 *of a shock when they said no actually he's part of your family.'* (Group E).  
14  
15

### 16 **Nature of the activity, capabilities and skills**

17  
18 There was a range of experience within this group of women. Many were quite new to the physical  
19 activities that were presented in the programme and were gradually attuned to them by the  
20 trainers, as explained by one woman,  
21  
22

23  
24 *'They proper explain it, they do exercise and they keep telling us as well both ways.'* (Group A)  
25

26 Generally the opportunity to participate in PA was valued and the women were pleased with what  
27 they had achieved. One woman described her effort and the beneficial effects she felt,  
28  
29

30  
31 *'Trust me when I do work-out I'll be drenched, you know, and there's lots of ladies that really put*  
32 *the effort in, but it's like built your confidence.'* (Group G).  
33

### 34 **Social role and identity, and Social influences**

35  
36 These domains were particularly important for this group of Pakistani women and additionally  
37 contribute to the cross-cutting collateral benefits that we identified (detailed below). The women  
38 were mostly homemakers and mothers and often described themselves in relation to this role,  
39  
40

41  
42 *'You put yourself back and you give your children more.'* (Group F).  
43

44 The social responsibility to provide hospitality was sometimes seen as detrimental to their progress  
45 in achieving a healthy lifestyle,  
46  
47

48  
49 *'I have to buy some unhealthy foods in, just because it's the norm, people expect something like*  
50 *that on the table and what happens is, if I bought it in I'll end up eating it myself.'* (Group F).  
51

52  
53 There was an expectation that the CIC providers would understand and accept the social and cultural  
54 issues that were pertinent to this participant group, because the delivery staff themselves were from  
55 the Muslim community as described by one woman,  
56  
57  
58  
59  
60

1  
2  
3 *'Because she's [trainer] Asian as well, she knows how to change basically, she knows the things*  
4 *that Asians ...whereas English people have different diet to what Asians do, our diet is totally*  
5 *different, whereas she helped us a lot by telling us small changes that we could make in our daily*  
6 *intake of food and the like type of cooking that we could do.'*  
7  
8

9  
10 The appreciation of the efforts that were being made by the CIC providers who were known to many  
11 of the women participants was evident. This was described by one interviewee,  
12

13  
14 *'I think [they are] helping our Asian community ladies, especially the oldies to come out [of the*  
15 *house]. ... They give her [the trainer] blessing.'* (Group D).  
16

17  
18 Recruitment by word of mouth was emphasised; people described how they had been encouraged  
19 to come by reassurance from those already engaged in the programme such as:  
20

21  
22 *'Friends are like encouraging you. 'no you have to come, you have to come,' just it helps*  
23 *socialising and get out as well, because you don't realise you can get out,'* (Group G), and *' it*  
24 *really helps to have someone saying actually it's ok to come,'* (Group B).  
25  
26

27  
28 The women also described how later on they themselves had encouraged others and become  
29 'champions' in promoting the intervention,  
30

31  
32 *'And then after I tell them it's really nice, come you see, it's really, really nice'* (Group B).  
33

### 34 **Regulation and decision**

35  
36 Regulation centred on attending the PA sessions, where prompts to attend were naturally provided  
37 as part of the women's usual routine. For example after taking the children to school the women  
38 could attend a session in an adjacent community venue.  
39

40  
41 *'Every Monday we go, [to the activity session] like half nine till half ten,'* (Group C).  
42  
43

44  
45 With regard to diet there was some appreciation of the need for portion size control, for example by  
46 using a smaller plate. Sweet fizzy drinks were perceived as addictive, therefore difficult to regulate  
47 and better avoided. The dietary advice offered included information about reading food labels,  
48 which was reported as helpful for making decisions about food choices. The fact that some sweet  
49 foods, specifically intended for Asian festivals, did not have nutrition labels was mentioned by some  
50 of the women participants.  
51  
52

### 53 **Emotion**

54  
55 Worry about the risk of diabetes, because of family members with the disease, and concern for  
56 relatives already suffering from diabetic complications was often mentioned, sometimes with regret  
57  
58  
59  
60

1  
2  
3 for those who had not been able to make beneficial lifestyle changes. Retinopathy was specifically  
4 mentioned where it had affected younger aged relatives to the detriment of their quality of life.  
5  
6

7 There was also some mention of possible embarrassment about going to the gym, described as,  
8

9 *'Making a fool of myself,' (Group E)*  
10

11 In contrast the enjoyment experienced by participating in the activity sessions was often mentioned.  
12

13 *'We have a good laugh and we have good things.'(Group C)*  
14

15 *But then the time flies by, you don't realised where the time has gone and you had a workout, but*  
16 *you had a laugh.'* (Group E)  
17  
18

19 *It's the motivation of seeing each other and as well as having a laugh, you enjoy your time here.'*  
20  
21 (Group B)  
22  
23

## 24 **Environment**

25 The main environmental issue, as anticipated for this population group, was the provision of a  
26 female only facility. This is a broader criterion than just a single room, for example in a leisure  
27 centre, set aside for an hour. This requirement includes access to changing and toilet facilities with  
28 reassurance that the area would be securely restricted to women during the sessions and no man  
29 would accidentally just walk in. There were also environmental issues of concern around the cold  
30 weather and the cost of attending sessions (once the free and subsidised period had expired).  
31  
32  
33  
34  
35

36 *'It's so cold. At the moment I've stopped walking because it's cold. (Group A)*  
37

38 *'In the park all friends go together but sometimes I said I don't want to go 'it's too cold' (Group D)*  
39

40 *'You have to look at it from the financial point of view, how much is the charge going to be? If I*  
41 *want to come three times a week how much is that going to be? (Group F)*  
42

43 *'Everything is expensive nowadays, just your basic household things cost an arm and a leg, so*  
44 *money is a big issue, but I think just for fitness the prices that they've got now are reasonable'*  
45  
46 (Group H)  
47  
48  
49  
50

## 51 **Collateral health and social benefits**

### 52 **Psychological health**

53  
54  
55  
56  
57  
58  
59  
60

1  
2  
3 Participants' perspectives of their psychological health involve sub-themes relating to, 'safety and  
4 freedom' (cultural acceptance and feeling comfortable) and 'positive affect' (feeling happier, less  
5 isolated, and not depressed).  
6  
7

8  
9 Reference to Islamic culture used in engagement strategies was influential, as described by one  
10 participant,

11  
12 *'The advert [Radio Ramadan] was talking Islamic, like people in Islam history, the women. In*  
13 *those days women were like quite fit and strong and they had to be and that's what got me in [to*  
14 *the programme] (Group D).*  
15  
16

17  
18 Similar references were used by the community provider during the sessions and contributed to the  
19 perspectives of cultural acceptance that made the women comfortable,  
20

21  
22 *'You know the instructor... and sometimes they talk in our own language and we just do jokes.'*  
23 *(Group A)*  
24  
25

26  
27 Feeling safe and comfortable was a regular and much emphasised theme, as described clearly by  
28 members of one group,  
29

30  
31 *'i) It's easy for me to say, 'I'm going to a ladies only gym, there's no men there,' and I know there*  
32 *will be no disapproval from the male side of our family.*  
33

34  
35 *ii) I felt like the whole mental pressure was lifted because I could justify to anyone that I am in an*  
36 *entirely female environment.*

37  
38 *i) He [husband] is in the mind that my wife is in a safe environment. ii) It is completely peaceful in*  
39 *mind. (Group F)*  
40

41  
42 The relief from anxiety was expressed by one participant as,

43  
44 *'You can just do exercise, you are not like wary - is anyone [male] suddenly going to walk through*  
45 *the door.'* (Group D)  
46  
47

48  
49 Other aspects of feeling safe were about confidence to exercise. For example,

50  
51 *'That's what they teach you, 'listen to your own body', whatever your body allows you go to that*  
52 *speed and level. With me being a blood pressure patient..... Absolutely I found no fear, no worry*  
53 *and I was in a good safe environment.'* (Group F).  
54

55  
56 The purposeful social grouping appeared to promote greater confidence within participants'  
57 perceived role: as described by one woman when talking about cooking for the family,  
58  
59  
60

1  
2  
3 *'if you are the main cook then it's part of your role, if you got the knowledge [re: healthy food*  
4 *choices] (Group G)*

5  
6  
7 Another woman talked about cooking for her husband,

8  
9 *'When I go home I say, 'I'm going to cook and you are going to eat, this is how I am going to*  
10 *cook.' Husband was a bit like, you know, like it is -isn't it? 'Ah, you are not going to cook like that?'*  
11 *'Oh yes I am, but it will taste nice.'* (Group F).

12  
13  
14  
15 There were also explicit references to depression such as,

16  
17 *'She [relative] spent time at home a lot and I think a lot of depression got to her' (Group E)*

18  
19  
20 Two women in another group discussed depression in relation to the intervention and the difference  
21 participation in a social and active group made to them in comparison to their previous behaviours.

22  
23  
24 *'i) If you stay home all day obviously it's different isn't it? I was very, very lazy. I didn't used to go*  
25 *out. I just used to stay at home all the time.*

26  
27 *ii) Watch TV.*

28  
29 *i) Watch TV and just do the housework and just eat. Sit down in one place. So now I am very*  
30 *active. This year we got the choice to get depressed or to go out and get fresh'. (Group A).*

### 31 32 33 **Family role and responsibility for the health of others**

34 The women's pivotal role within the family as the main cook was perceived as conveying a  
35 responsibility for their family's health that was often explained such as,

36  
37  
38 *'We have responsibility, we doing the shopping, we bring all the best things back for them' (Group*  
39 *D).*

40  
41  
42 In relation to this there were clear statements that the knowledge and support the women had  
43 received through the programme would empower them to make healthy changes for their own  
44 benefit with the added consequence of influencing other family and community members. One  
45 person clearly spoke about this as:

46  
47  
48  
49 *'By educating the women I think what you are doing is you are empowering the women to sort of*  
50 *make decisions, informed decisions 'cos they know that, 'this is right', this is wrong'. Then they are*  
51 *in turn helping their younger, and extended elders.'* (Group F)

52  
53  
54  
55 Similarly another woman described how her perception of responsibility had changed,

1  
2  
3 *'Now I go outside [of the house, to the sessions] I know what to do to my child you see. I want*  
4 *to give good things you know.'* (Group D)

5  
6  
7 A description of specific changes was supplied by another group,

8  
9 *'We have stopped biscuits, we stopped cakes, we stopped crisps, we stopped everything, even*  
10 *we stopped white bread as well, we start brown bread and everything like brown rice.'*

11  
12  
13 This confidence to change extended to encouraging their children to exercise and even jokingly to  
14 the possibility that they might influence their husbands as explained in discussion with laughter  
15 by one group,

16  
17 *'i) I wanna send mine [husband].*

18  
19 *ii) Yeah, I said to mine, 'Get out there'.*

20  
21 *i) They are jealous wasn't it, looking at us, and now, 'Look we [imagining husbands' speaking]*  
22 *need to work out.'* (Group G).

23  
24  
25  
26 There was also an appreciation by the women of the way their own health would impact on others  
27 as explained in the following,

28  
29 *'I'm the one that makes – does everything, if for some reason my health suffers then everyone*  
30 *else in our family suffers.'* (Group E)

### 31 32 33 **An ethos of inclusion and accommodation of differences**

34  
35 The Pakistani women within this group had a range of faith related preferences. A particular  
36 example was that some women did not want to participate in activities that involved music and the  
37 other women in the activity group were encouraged, by the trainer, to respect and accommodate  
38 these wishes so the issue was resolved. This issue and its resolution were reported by one or two  
39 groups,

40  
41 *'Then [the trainer] said, 'No, they don't like music on' then [everyone] agree as well. They said,*  
42 *'Oh you are so kind, because we don't like music.'* (Group C).

43  
44  
45 Although this intervention targeted ethnic minority participants, the additional PA sessions run by  
46 the community provider were open to other paying customers and attracted a few of the local  
47 women from the white population, who were welcomed as described by one woman,

48  
49 *'Four white women were there and we had such a laugh with them as well, you know trying to*  
50 *speak our lingo and we were like, we tried like, the one that do speak English they are trying to*  
51 *say their words... we are having a laugh and everything'* (Group E).

1  
2  
3 This inclusivity was similarly described by another group,  
4

5 *'i) The more the merrier and I think as long as it is women only it doesn't matter what ethnicity or*  
6 *what race or what age, we don't care .*

7  
8 *ii) I'm sure women from non-Muslim background they will probably feel intimidated by gyms*  
9 *anyway and they might find coming to a women only gym- Wow this is great!' (Group F).*  
10  
11

12 The women themselves even encouraged wider participation,  
13

14  
15 *'I've been recommending it to lots of Asians [and] English ladies, because they [all] like Bollywood*  
16 *music don't they?' (Group G).*  
17  
18

19 The appreciation of issues that would be common to all women was described by one group  
20 member as,  
21

22  
23 *'When women work together from different cultures we all find that we have the same fears, the*  
24 *same sort of issues about our bodies and how we want to look better'(Group F) .*  
25  
26

## 27 **DISCUSSION**

### 28 **Main findings**

29  
30 **The NLNY intervention is unusual in being centred on group delivered PA sessions. The Pakistani**  
31 **women's appreciation of the opportunity to engage in group delivered PA sessions in a culturally**  
32 **appropriate and socially supportive environment was an important finding. This qualitative study**  
33 **suggests that provision of culturally appropriate PA sessions will facilitate the engagement of**  
34 **Pakistani women and encourage their PA and dietary behaviour change.** The study results emphasise  
35 the importance of social influences and the women's own perceived social role and identity for  
36 intervention development. The fact that the delivery staff were from the local Pakistani women's  
37 own community contributed to recruitment and engagement of the participants.  
38  
39

40  
41 The engagement of Pakistani women in this culturally acceptable, social and proactively healthful  
42 context may have important health and social benefits in addition to those specifically intended by  
43 the intervention. We have described these unanticipated additional effects as 'collateral health and  
44 social benefits' and they comprise: a potential positive impact on the women's own psychological  
45 health including reduction in feelings of isolation and depression; improved knowledge and  
46 confidence with which to fulfil their perceived role as having responsibility for providing healthy food  
47 for their families and thus encouraging healthy lifestyles in their children; and an ethos of  
48 **accommodation** for the range of different cultural variation within local groups of women.  
49  
50  
51  
52  
53  
54  
55  
56  
57  
58  
59  
60

### Strengths and limitations

This qualitative study was conducted quite early in the life of the intervention programme, when the women had been involved in the intervention for less than six months. It was not clear whether early enthusiasm for the intervention would be sustained. The interviews were conducted in English, which was not the participants' first language. Although participants could all speak some English and were able to translate for each other to an extent, the accuracy of these translations remains unclear. The small group, mostly dyadic, format for conducting the interviews, and the fact that they took place alongside intervention sessions that the women would usually be attending, facilitated study engagement. The disadvantage of this was that the interview rooms were not very quiet and so some of the recordings were difficult for the staff undertaking the transcriptions. We were able to call on an experienced staff team to ensure the transcriptions were as accurate as possible. The interview arrangements were made by the intervention delivery staff, which could mean some bias in the choice of respondents, although we accessed women from different areas of the town and we were aware of a diverse range of cultural differences among Pakistani women who participated. The researcher who conducted the interviews was not Pakistani and only spoke English; however, the interviewees were open and friendly, keen to communicate their views and to do so in a way that could be understood beyond their cultural group. The group of women who took part in the interview study were aged from 27 years to 45 years and most were under 40 years of age. This is the younger age range of the typical target population for T2D prevention. We do not know how effective the intervention will be in attracting older women. There was some suggestion that these younger women might recruit older relations to take part in the intervention and it will be valuable to assess the recruitment age profile over time.

### Comparison with other studies and implications

The NICE guidance for risk identification and provision of preventive interventions for high-risk individuals included recommendations for adults aged 25 to 39 of South Asian ethnicity, who are not included in the NHS Health Checks programme.[1] The findings from a recent National Institute for Health Research (NIHR) Health Technology Assessment evidence synthesis confirmed the importance of adapting health promotion interventions for ethnic minority communities and suggested that adaptation decisions should be based on detailed understanding of the target community.[18] Our plans for the adaptation of the NLNY intervention [12 27] to engage people from the local ethnic minority communities were therefore appropriate. The service commissioners took the lead in convening an operational group that included representation from the evaluation team. The commissioners were able to expand existing community links. Members of the local



1  
2  
3 ethnic minority communities were invited to a dissemination seminar that was arranged to promote  
4 the NLNY intervention in its original format and invite interest in the adaptation.  
5  
6

7 In the interview study reported here we sought to explore Pakistani female participants' views and  
8 we were able to draw on information from our qualitative evaluation within the original NLNY  
9 intervention.[11] As we experienced with the original NLNY intervention, community based  
10 recruitment was successful. The benefit of community based recruitment procedures was also  
11 experienced in the PODOSA trial.[9] The adapted NLNY intervention was unusual in being provided  
12 through a CIC.[28] It was evident that some of the women interviewed knew the intervention  
13 providers and that this positively affected their confidence and decision to participate.  
14  
15  
16  
17

18 The social support engendered by the nature of the intervention was evident, as it was in the  
19 original NLNY intervention, and this reflects the more general literature around social support and  
20 behaviour change.[29] The social needs of this specific participant group to undertake various  
21 physical activities were of paramount importance for their engagement and confidence to become  
22 involved in the intervention. Whereas other interventions may be counselling based, NLNY  
23 incorporates group delivered PA in a central role. The provision of occasional female only sessions in  
24 local authority leisure centres does not constitute ideal provision of appropriate facilities (for  
25 example if the toilets are in common areas). In this feasibility phase the provision of staff training so  
26 that women from the Pakistani community could conduct PA sessions in appropriate and convenient  
27 community venues, including school premises, was of immediate importance for the continued  
28 intervention delivery.  
29  
30  
31  
32  
33  
34  
35  
36  
37

38 The identification of beneficial effects on other aspects of participants' own health that may result  
39 from their participation in PA intervention delivered in social groups and the 'spill over' effects of  
40 health promotion on other family members is supported by other evidence. [30-33] This additional  
41 benefit may have importance for health economic evaluation of interventions designed to promote  
42 increased PA, especially where these are delivered to groups that are organised to promote social  
43 support networks.  
44  
45  
46  
47

### 48 **Unanswered questions and future research**

49 The feasibility study of the adapted version of the NLNY intervention, which was planned to better  
50 engage members of the local ethnic minority communities, is on-going and we plan to analyse the  
51 recruitment, retention and outcomes at 12 months follow-up by sex and ethnic group. The entire  
52 feasibility study, together with our previous work relating to the original NLNY intervention[10] and  
53 the related qualitative studies, including the interview study reported here, [11] will inform plans for  
54  
55  
56  
57  
58  
59  
60

1  
2  
3 optimisation of the intervention and options for definitive evaluation of the NLNY intervention for  
4 effectiveness and cost effectiveness.  
5  
6  
7  
8

### 9 **Acknowledgements**

10 We thank the participants in the adapted version of the New life, New you intervention, particularly  
11 those who gave their time for these interviews. We thank the project implementation team  
12 including NHS health promotion staff and intervention delivery staff, especially Claire Robinson and  
13 Shazia Noor.  
14

### 15 **Funding**

16 Integral to the London 2012 Olympic and Paralympic Games was the aspiration that the Games  
17 would encourage more people across the UK to participate in physical activity. In the North East of  
18 England this Olympics vision and the regional health strategy provided the foundation for the 'New  
19 life, New you' intervention that was originally funded as a 2012 Olympic Legacy Project by a  
20 consortium including: Sport England, Middlesbrough Council, Middlesbrough Primary Care Trust, the  
21 North East Strategic Health Authority. The adapted version of the New life, New you intervention  
22 was designed to better engage the local ethnic minority community and funded by Middlesbrough  
23 Primary Care Trust. MW and FFS are funded in part by the British Heart Foundation, Cancer Research  
24 UK, the Economic and Social Research Council, Medical Research Council and National Institute of  
25 Health Research (NIHR) as director and senior investigator respectively of Fuse - the Centre for  
26 Translational Research in Public Health, which is a UKCRC Public Health Research Centre of  
27 Excellence. The funders had no role in study design, data collection and analysis, decision to publish,  
28 or preparation of the manuscript. The views expressed herein are those of the authors and not  
29 necessarily those of the above named funders or UKCRC.  
30  
31  
32  
33  
34  
35  
36  
37

### 38 **Abbreviations**

39 CIC Community Interest Company

40 FINDRISC Finnish Diabetes Risk Score

41 IMD UK Government Statistics index of multiple deprivation

42 NICE UK National Institute for Health and Care Excellence

43 NLNY 'New life, New you' intervention

44 T2D Type 2 diabetes

45 TDF Theoretical Domains Framework of behaviour change

46 REPS UK Register of exercise professionals

### 47 **Authors' contributions**

48 MW was a member of the Steering Group responsible securing funding and for the outline plan for  
49 the original NLNY intervention and evaluation. LP contributed to the development of the NLNY pilot  
50  
51  
52  
53  
54

1  
2  
3 intervention and designed the feasibility evaluation. Adaptation of the NLNY intervention was later  
4 planned to better engage local ethnic minority communities. This interview study was planned by LP  
5 as part of the evaluation of the adapted NLNY intervention. LP conducted the interviews. FFS, SUD  
6 and MW provided advice on the analysis. LP conducted the preliminary analysis which was then  
7 discussed and agreed with SUD. MW, FFS and SUD, reviewed, and contributed to the manuscript  
8 drafted by LP. All authors read and agreed the final version.  
9  
10

### 11 **Competing interests**

12 The business case and outline plan for the original 'New life, New you' study was determined by a  
13 steering committee. This included representatives from members of the organisations that  
14 comprised the funding consortium as well as the Principal Investigator for the evaluation, co-author  
15 MW. The detailed development of the intervention was then progressed by a small operational team  
16 including the evaluation researcher, co-author LP. The adapted version of the New life, New you  
17 intervention was funded by Middlesbrough PCT. The funders had no role in the collection, analysis,  
18 and interpretation of data, the writing of the article and a decision to submit it for publication. Co-  
19 authors: MW, FS, SD and LP receive salaries from Newcastle University, Institute of Health and  
20 Society that provide open access funding for the publication. The authors declare that they have no  
21 other competing interests.  
22  
23  
24

### 25 **Data sharing**

26 There is no additional data available  
27  
28

### 29 **References**

- 30 1. NICE. PH 38 Preventing type 2 diabetes - risk identification and interventions for individuals at  
31 high risk. 2012. <http://guidance.nice.org.uk/PH38> (accessed 17/09/2013).
- 32 2. Forouhi NG, Merrick D, Goyder E, et al. Diabetes prevalence in England, 2001—estimates from an  
33 epidemiological model. *Diabetic Medicine* 2006;**23**(2):189-97 doi: 10.1111/j.1464-  
34 5491.2005.01787.x[published Online First: Epub Date]].
- 35 3. Pollard TM. Ethnic Groups as Migrant Groups: Improving Understanding of Links Between  
36 Ethnicity/Race and Risk of Type 2 Diabetes and Associated Conditions\*. *Annual Review of*  
37 *Anthropology* 2011;**40**(1):145-58 doi: doi:10.1146/annurev-anthro-081309-  
38 145719[published Online First: Epub Date]].
- 39 4. Knowler WC, Barrett-Connor E, Fowler SE, et al. Reduction in the incidence of type 2 diabetes with  
40 lifestyle intervention or metformin. *N Engl J Med* 2002;**346**(6):393-403
- 41 5. Tuomilehto J, Lindstrom J, Eriksson JG, et al. Prevention of type 2 diabetes mellitus by changes in  
42 lifestyle among subjects with impaired glucose tolerance. *N Engl J Med* 2001;**344**(18):1343-  
43 50
- 44 6. Costa B, Barrio F, Cabré JJ, et al. Delaying progression to type 2 diabetes among high-risk Spanish  
45 individuals is feasible in real-life primary healthcare settings using intensive lifestyle  
46 intervention. *Diabetologia* 2012:1-10 doi: 10.1007/s00125-012-2492-6[published Online  
47 First: Epub Date]].
- 48 7. Jain SH, Horton ES, (Editors) KK. Advancing the Science and Practice of Diabetes Prevention.  
49 *American Journal of Preventive Medicine* 2013; **44**,(4 Supplement 4):A1-A4, S297-S400
- 50 8. Samsudeen BS, Douglas A, Bhopal RS. Challenges in recruiting South Asians into prevention trials:  
51 Health professional and community recruiters' perceptions on the PODOSA trial. *Public*  
52 *Health* 2011;**125**(4):201-09 doi: <http://dx.doi.org/10.1016/j.puhe.2011.01.013>[published  
53 Online First: Epub Date]].  
54  
55  
56  
57  
58  
59  
60

- 1  
2  
3 9. Douglas A, Bhopal R, Bhopal R, et al. Recruiting South Asians to a lifestyle intervention trial:  
4 experiences and lessons from PODOSA (Prevention of Diabetes & Obesity in South Asians).  
5 *Trials* 2011;**12**(1):220
- 6  
7 10. Penn L, Ryan V, White M. Feasibility, acceptability, and outcomes at 12 months follow-up of a  
8 novel community based intervention to prevent type 2 diabetes in adults at high risk: mixed  
9 methods pilot study. *BMJ Open* 2013
- 10  
11 11. Penn L, Dombrowski SU, Sniehotta FF, et al. Participants' perspectives on making and  
12 maintaining behavioural changes in a lifestyle intervention for type 2 diabetes prevention: a  
13 qualitative study using the theory domain framework. *BMJ Open* 2013;**3**(6) doi:  
14 10.1136/bmjopen-2013-002949[published Online First: Epub Date] | .
- 15  
16 12. Penn L, Lordon J, Lowry R, et al. Towards the translation of research evidence to service  
17 provision: experience from North East England, UK. In: Peter Schwarz, ed. *Diabetes*  
18 *Prevention in Practice*. Dresden, 2010.
- 19  
20 13. Neighbourhoods Statistical Release. The English Indices of Deprivation 2010. In: Department for  
21 Communities and Local Government, ed. <http://www.statistics.gov.uk>: Crown Copyright,  
22 2011.
- 23  
24 14. Sport England. Active People Survey 1. Secondary Active People Survey 1 2007.  
25 <http://www.sportengland.org/>.
- 26  
27 15. Lindstrom J, Tuomilehto J. The diabetes risk score: a practical tool to predict type 2 diabetes risk.  
28 *Diabetes Care* 2003;**26**(3):725-31
- 29  
30 16. Kolb D A. *Experiential learning : experience as the source of learning and development*  
31 Englewood Cliffs, N.J. : Prentice-Hall 1984.
- 32  
33 17. Office for National Statistics UK. Middlesbrough Local Authority. 2013.  
34 <http://www.neighbourhood.statistics.gov.uk>.
- 35  
36 18. Liu J, Davidson E, Bhopal R, et al. Adapting health promotion interventions to meet the needs of  
37 ethnic minority groups: mixed-methods evidence synthesis. *Health Technol Assess*  
38 2012;**16**(44)
- 39  
40 19. Netto G, Bhopal R, Lederle N, et al. How can health promotion interventions be adapted for  
41 minority ethnic communities? Five principles for guiding the development of behavioural  
42 interventions. *Health Promotion International* 2010;**25**(2):248-57
- 43  
44 20. MRC (Medical Research Council UK). Developing and evaluating complex interventions: new  
45 guidance. 2008;  
46 <http://www.mrc.ac.uk/Utilities/Documentrecord/index.htm?d=MRC004871>.  
47 [www.mrc.ac.uk/complexinterventionsguidance](http://www.mrc.ac.uk/complexinterventionsguidance) (accessed 17/09/2013).
- 48  
49 21. Babakus W, Thompson J. Physical activity among South Asian women: a systematic, mixed-  
50 methods review. *International Journal of Behavioral Nutrition and Physical Activity*  
51 2012;**9**(1):150
- 52  
53 22. Davies M, Khunti K, Chauhan U, et al. *The handbook for vascular risk assessment, risk reduction*  
54 *and risk management*: University of Leicester, 2008.
- 55  
56 23. Francis J, O'Connor D, Curran J. Theories of behaviour change synthesised into a set of  
57 theoretical groupings: introducing a thematic series on the theoretical domains framework.  
58 *Implementation Science* 2012;**7**(1):35
- 59  
60 24. Ritchie J, Lewis J, editors. *Qualitative research practice: a guide for social science students and*  
*researchers*. London: Sage Publications, 2003.
25. QSRInternational. NVivo 9. 2012
26. Aspers P. Empirical Phenomenology: A Qualitative Research Approach (The Cologne Seminars).  
*Indo-Pacific Journal of Phenomenology* 2009;**9**(2)
27. Penn L, Lordon J, Lowry R, et al. Translating research evidence to service provision for prevention  
of type 2 diabetes: development and early outcomes of the 'New life, New you' intervention.,  
*British Journal of Diabetes and Vascular Disease* 2011;**11**(4):175 - 81

- 1  
2  
3 28. Community Interest Companies. Department for Business, Education and Skills,. 2013. (accessed  
4 17/09/2013).
- 5 29. Absetz P, Valve R, Oldenburg B, et al. Type 2 diabetes prevention in the "real world": one-year  
6 results of the GOAL Implementation Trial. *Diabetes Care* 2007;**30**(10):2465-70
- 7 30. Basu A, Meltzer D. Implications of spillover effects within the family for medical cost-  
8 effectiveness analysis. *Journal of Health Economics* 2005;**24**(4):751-73
- 9 31. Falba TA, Sindelar JL. Spousal concordance in health behavior change. *Health Services Research*  
10 2008;**43**(1 P1):96-116
- 11 32. Goebbels AFG, Lakerveld J, Ament AJHA, et al. Exploring non-health outcomes of health  
12 promotion: The perspective of participants in a lifestyle behaviour change intervention.  
13 *Health Policy* 2012;**106**(2):177-86 doi:  
14 <http://dx.doi.org/10.1016/j.healthpol.2012.04.005>[published Online First: Epub Date]].
- 15 33. Gorin AA, Wing RR, Fava JL, et al. Weight loss treatment influences untreated spouses and the  
16 home environment: Evidence of a ripple effect. *International Journal of Obesity*  
17 2008;**32**(11):1678-84  
18  
19  
20  
21  
22  
23  
24  
25  
26  
27  
28  
29  
30  
31  
32  
33  
34  
35  
36  
37  
38  
39  
40  
41  
42  
43  
44  
45  
46  
47  
48  
49  
50  
51  
52  
53  
54  
55  
56  
57  
58  
59  
60

## Consolidated criteria for reporting qualitative studies (COREQ): 32-item checklist

Developed from:

Tong A, Sainsbury P, Craig J. Consolidated criteria for reporting qualitative research (COREQ): a 32-item checklist for interviews and focus groups. *International Journal for Quality in Health Care*. 2007. Volume 19, Number 6: pp. 349 – 357

| No. Item                                       | Guide questions/description                                                                                                                              | Reported on Page # |
|------------------------------------------------|----------------------------------------------------------------------------------------------------------------------------------------------------------|--------------------|
| <b>Domain 1: Research team and reflexivity</b> |                                                                                                                                                          |                    |
| <i>Personal Characteristics</i>                |                                                                                                                                                          |                    |
| 1. Inter viewer/facilitator                    | Which author/s conducted the inter view or focus group?                                                                                                  | 6                  |
| 2. Credentials                                 | What were the researcher's credentials?<br>E.g. PhD, MD                                                                                                  | 6                  |
| 3. Occupation                                  | What was their occupation at the time of the study?                                                                                                      | 6                  |
| 4. Gender                                      | Was the researcher male or female?                                                                                                                       | 6                  |
| 5. Experience and training                     | What experience or training did the researcher have?                                                                                                     | 6                  |
| <i>Relationship with participants</i>          |                                                                                                                                                          |                    |
| 6. Relationship established                    | Was a relationship established prior to study commencement?                                                                                              | 6                  |
| 7. Participant knowledge of the interviewer    | What did the participants know about the researcher? e.g. personal goals, reasons for doing the research                                                 | 6                  |
| 8. Interviewer characteristics                 | What characteristics were reported about the inter viewer/facilitator? e.g. Bias, assumptions, reasons and interests in the research topic               | 6                  |
| <b>Domain 2: study design</b>                  |                                                                                                                                                          |                    |
| <i>Theoretical framework</i>                   |                                                                                                                                                          |                    |
| 9. Methodological orientation and Theory       | What methodological orientation was stated to underpin the study? e.g. grounded theory, discourse analysis, ethnography, phenomenology, content analysis | 6                  |
| <i>Participant selection</i>                   |                                                                                                                                                          |                    |
| 10. Sampling                                   | How were participants selected? e.g. purposive, convenience, consecutive, snowball                                                                       | 6                  |
| 11. Method of approach                         | How were participants approached? e.g. face-to-face, telephone, mail, email                                                                              | 6                  |
| 12. Sample size                                | How many participants were in the study?                                                                                                                 | 7                  |
| 13. Non-participation                          | How many people refused to participate or dropped out? Reasons?                                                                                          | N/A                |
| <i>Setting</i>                                 |                                                                                                                                                          |                    |
| 14. Setting of data collection                 | Where was the data collected? e.g. home, clinic, workplace                                                                                               | 6                  |
| 15. Presence of non-participants               | Was anyone else present besides the participants and researchers?                                                                                        | 6                  |
| 16. Description of sample                      | What are the important characteristics of the sample? e.g. demographic data, date                                                                        | 7                  |

|                                        |                                                                                                                                 |        |
|----------------------------------------|---------------------------------------------------------------------------------------------------------------------------------|--------|
| <i>Data collection</i>                 |                                                                                                                                 |        |
| 17. Interview guide                    | Were questions, prompts, guides provided by the authors? Was it pilot tested?                                                   | 6      |
| 18. Repeat interviews                  | Were repeat inter views carried out? If yes, how many?                                                                          | No     |
| 19. Audio/visual recording             | Did the research use audio or visual recording to collect the data?                                                             | 6      |
| 20. Field notes                        | Were field notes made during and/or after the inter view or focus group?                                                        | 6      |
| 21. Duration                           | What was the duration of the inter views or focus group?                                                                        | 6      |
| 22. Data saturation                    | Was data saturation discussed?                                                                                                  | No     |
| 23. Transcripts returned               | Were transcripts returned to participants for comment and/or correction?                                                        | No     |
| <b>Domain 3: analysis and findings</b> |                                                                                                                                 |        |
| <i>Data analysis</i>                   |                                                                                                                                 |        |
| 24. Number of data coders              | How many data coders coded the data?                                                                                            | 7      |
| 25. Description of the coding tree     | Did authors provide a description of the coding tree?                                                                           | 7      |
| 26. Derivation of themes               | Were themes identified in advance or derived from the data?                                                                     | 7      |
| 27. Software                           | What software, if applicable, was used to manage the data?                                                                      | 7      |
| 28. Participant checking               | Did participants provide feedback on the findings?                                                                              | No     |
| <i>Reporting</i>                       |                                                                                                                                 |        |
| 29. Quotations presented               | Were participant quotations presented to illustrate the themes/findings? Was each quotation identified? e.g. participant number | 8 - 15 |
| 30. Data and findings consistent       | Was there consistency between the data presented and the findings?                                                              | N/A    |
| 31. Clarity of major themes            | Were major themes clearly presented in the findings?                                                                            | 8 - 15 |
| 32. Clarity of minor themes            | Is there a description of diverse cases or discussion of minor themes?                                                          | N/A    |

Once you have completed this checklist, please save a copy and upload it as part of your submission. When requested to do so as part of the upload process, please select the file type: *Checklist*. You will NOT be able to proceed with submission unless the checklist has been uploaded. Please DO NOT include this checklist as part of the main manuscript document. It must be uploaded as a separate file.

# BMJ Open

## PERSPECTIVES OF UK PAKISTANI WOMEN ON THEIR BEHAVIOUR CHANGE TO PREVENT TYPE 2 DIABETES: QUALITATIVE STUDY USING THE THEORY DOMAIN FRAMEWORK

|                                 |                                                                                                                                                                                                                                                                                                  |
|---------------------------------|--------------------------------------------------------------------------------------------------------------------------------------------------------------------------------------------------------------------------------------------------------------------------------------------------|
| Journal:                        | <i>BMJ Open</i>                                                                                                                                                                                                                                                                                  |
| Manuscript ID:                  | bmjopen-2013-004530.R2                                                                                                                                                                                                                                                                           |
| Article Type:                   | Research                                                                                                                                                                                                                                                                                         |
| Date Submitted by the Author:   | 16-Jun-2014                                                                                                                                                                                                                                                                                      |
| Complete List of Authors:       | Penn, Linda; Newcastle University, Institute of Health and Society<br>Dombrowski, Stephan; University of Stirling, School of Natural Sciences<br>Sniehotta, Falko; Newcastle University, Institute of Health and Society<br>White, Martin; Newcastle University, Institute of Health and Society |
| <b>Primary Subject Heading</b>: | Public health                                                                                                                                                                                                                                                                                    |
| Secondary Subject Heading:      | Diabetes and endocrinology, Health policy, Nutrition and metabolism,<br>Qualitative research, Research methods                                                                                                                                                                                   |
| Keywords:                       | General diabetes < DIABETES & ENDOCRINOLOGY, PREVENTIVE<br>MEDICINE, PUBLIC HEALTH, QUALITATIVE RESEARCH, HEALTH SERVICES<br>ADMINISTRATION & MANAGEMENT, Health policy < HEALTH SERVICES<br>ADMINISTRATION & MANAGEMENT                                                                         |
|                                 |                                                                                                                                                                                                                                                                                                  |

SCHOLARONE™  
Manuscripts

Only



1  
2  
3  
4 **PERSPECTIVES OF UK PAKISTANI WOMEN ON THEIR BEHAVIOUR CHANGE TO**  
5 **PREVENT TYPE 2 DIABETES: QUALITATIVE STUDY USING THE THEORY DOMAIN**  
6 **FRAMEWORK**  
7

8  
9  
10 Linda Penn,<sup>1,2</sup> Stephan U Dombrowski,<sup>3</sup> Falko F Sniehotta,<sup>1,2</sup> Martin White<sup>1,2</sup>

11  
12 <sup>1</sup> Institute of Health and Society, Newcastle University, Baddiley Clark Building, Richardson  
13 Road, Newcastle upon Tyne, NE2 4AX, UK.

14  
15  
16 <sup>2</sup> Fuse, UKCRC Centre for Translational Research in Public Health

17  
18  
19 <sup>3</sup> School of Natural Sciences, Division of Psychology, University of Stirling, FK9 4LA  
20

21  
22  
23  
24 Linda Penn, Research Associate (corresponding author): [linda.penn@ncl.ac.uk](mailto:linda.penn@ncl.ac.uk)

25  
26  
27 Stephan U Dombrowski, Lecturer in Health Psychology: [s.u.dombrowski@stir.ac.uk](mailto:s.u.dombrowski@stir.ac.uk)

28  
29  
30 Falko F Sniehotta, Reader in Health Psychology: [falko.sniehotta@ncl.ac.uk](mailto:falko.sniehotta@ncl.ac.uk)

31  
32 Martin White, Professor of Public Health: [martin.white@ncl.ac.uk](mailto:martin.white@ncl.ac.uk)  
33

34 **Key Words**

35 Behaviour change

36 Community

37 Cultural adaptation

38 Ethnicity

39 Intervention

40 Type 2 diabetes

41 Intervention

42 Pakistani

43 Physical activity

44 Prevention

45 South Asian

46 Qualitative

47 **Word count = words**  
48  
49  
50  
51  
52  
53  
54  
55  
56  
57  
58  
59  
60

## ABSTRACT

### Background

Type 2 diabetes (T2D) is a debilitating disease, highly prevalent in UK South Asians, and preventable by lifestyle intervention. The 'New life, New you' (NLNY) physical activity (PA) and dietary intervention for T2D prevention was culturally adapted to better engage minority ethnic populations and tested for feasibility.

### Objectives

To investigate Pakistani women participants' perspectives of their behaviour change and of salient intervention features.

### Setting

A community based eight-week programme of group delivered PA sessions with behavioural counselling and dietary advice, culturally adapted for ethnic minority populations, in an area of socioeconomic deprivation. Participants to NLNY were recruited through screening events in community venues across the town.

### Participants

Interviews were conducted with twenty Pakistani women NLNY participants, aged 26-45 (mean 33.5) years, from different parts of town.

### Results

Within the *a priori* TDF domains, (intentions and goals, reinforcement, knowledge, nature of the activity, social role and identity, social influences, capabilities and skills, regulation and decision, emotion, and environment), we identified the importance of social factors relating to participants' own PA and dietary behaviour change. We also identified cross-cutting themes as collateral benefits of the intervention including: participants' 'psychological health'; 'responsibility' (for others' health, especially family members included in the new PA and diet regimes); and 'inclusion' (an ethos of accommodating differences).

### Conclusions

Our findings suggest that culturally adapted interventions for Pakistani women at risk of T2D, delivered via group PA sessions with counselling and dietary advice, may encourage their PA and dietary behaviour change, and have collateral health and social benefits. The NLNY intervention appeared to be acceptable. We plan to evaluate recruitment, retention and likely effect of the intervention on participant behaviour prior to definitive evaluation.

## ARTICLE SUMMARY

### Article focus

The 'New life, New you' lifestyle intervention for diabetes prevention was culturally adapted for local Pakistani women and tested for feasibility. In an interview study we sought intervention participants' perspectives:

- On their behaviour change
- On the intervention procedures and cultural adaptations

### Key messages

- We identified the importance of several social factors, relating to participants' engagement in the intervention and their physical activity and dietary behaviour change
- Participants reported intervention benefits regarding their psychological health and positive affect
- Participants expressed responsibility for improving their family's lifestyle and the intention to apply learning from the intervention

### Strengths and limitations

This qualitative study:

- Highlighted cultural adaptations needed to engage Pakistani women in a lifestyle intervention
- Identified unanticipated intervention benefits
- Was limited by data collection early in the intervention timescale and the small study size

## BACKGROUND

Type 2 diabetes (T2D) is a debilitating disease that carries an increased risk of eye, kidney, nerve, and vascular disease with decreased life expectancy.[1] Prevalence of T2D is greater in UK residents of ethnic minority heritage than in the general UK population and the disease often occurs at an earlier age in these population groups.[2 3] Although there is good research evidence for the efficacy of lifestyle interventions for prevention of T2D,[4 5] translation of such evidence to service provision remains challenging. [6 7] The UK National Institute for Health and Care Excellence (NICE) guidance for risk identification and preventive interventions for high-risk individuals was published in July 2012.[1] This NICE guidance addresses the need to provide services, including risk assessment for those aged 25 to 39 years who are not included in the National Health Service (NHS) Health Checks programme. The need to provide risk assessment and preventive opportunities for - adults younger than those included in the NHS Health checks is particularly relevant for ethnic minorities.[1]

The 'New life, New you' (NLNY) intervention for primary prevention of T2D was developed in Middlesbrough and has to date been evaluated through a feasibility study.[8-10] According to UK government statistics, Middlesbrough ranks as one of the ten most deprived areas in England based on the index of multiple deprivation (IMD) ranks of localities within the town.[11] The original NLNY intervention primarily targeted middle and older aged adults in low income groups, priority groups identified using market segmentation of the Sport England Active People survey.[12] The NLNY intervention was designed to be delivered in leisure and community settings and to recruit participants directly from the community, rather than relying on a health services referral route. Recruits to the NLNY intervention were assessed for individual risk of future T2D, using the Finnish diabetes risk score (FINDRISC).[13] The NLNY intervention promoted increased physical activity, healthy eating and weight loss, in line with the UK National Institute for Health and Care Excellence (NICE) guidance.[1] The intervention was delivered through an eight week programme of weekly supervised physical activity sessions, each followed by reflection, behavioural counselling and advice, with ongoing support and follow-up assessment at six and 12 months.[14] Details of the original NLNY intervention feasibility study has been published.[8 10] We have described the design of the eight week programme in terms of experiential learning, which emphasises the central role of a 'here and now' experience (in this case experience of a physical activity) along with observation and reflection in promoting actions.[14]

In Middlesbrough minority ethnic communities comprise about 9% of the total population. The South Asian community is well established in the town and in 2011 comprised about 6.1 % of the total population (8461 of a total population of 138,700).[15] Most of the South Asians in Middlesbrough are of Pakistani heritage, although there are also people of Indian and Bangladeshi

1  
2  
3 heritage. Other ethnic groups in Middlesbrough include Black African and Chinese communities.  
4 Although participants from ethnic minorities were not excluded from the original NLNY intervention,  
5 few were recruited. To better engage members of the local ethnic minority communities, we  
6 planned a cultural adaptation of the NLNY intervention. We also extended the age range of people  
7 that were eligible for the programme to include adults over 25 years with no upper age limit.[16 17]  
8 The feasibility study for the adapted NLNY intervention, for both men and women, is on-going. We  
9 are collecting recruitment data, including ethnicity and outcome data comprising weight and waist  
10 measurements along with self-report data on PA, diet, and quality of life at six and 12 months of  
11 follow-up in a before and after study.  
12  
13

14  
15  
16  
17  
18 Recruitment of South Asian participants to preventive interventions has proved difficult.[18] We  
19 anticipated that the cultural needs of Muslim women might deter their engagement in PA unless  
20 these needs were recognised and addressed. In this paper, we report a qualitative interview study  
21 that was conducted as part of the feasibility and acceptability evaluation of the adapted NLNY  
22 intervention, in line with the MRC guidance for the development and evaluation of complex  
23 interventions to improve health.[19] Women from the Pakistani community were early recruits to  
24 the adapted NLNY programme and this interview study was conducted at an early stage of the  
25 programme. We aimed to investigate Pakistani Women's perspectives of their behaviour change and  
26 salient features of the culturally adapted NLNY programme. We planned this investigation, along  
27 with other outcomes of the feasibility study, to subsequently inform the optimisation of the  
28 intervention via discussion with the commissioners. This feasibility assessment will also inform  
29 future options for a definitive evaluation of the adapted NLNY programme.  
30  
31  
32  
33  
34  
35  
36  
37

## 38 **METHODS**

39  
40 To develop the adapted intervention and its evaluation, the NHS commissioners convened an  
41 operational group that included community health champions as well as health and fitness workers.  
42 The adapted NLNY intervention was informed by mapping the distribution of ethnic minority  
43 communities within the Local Authority area, followed by stakeholder consultations. The project  
44 delivery was managed by an NHS health improvement specialist. One adaptation of the NLNY  
45 intervention specifically targeted Pakistani women. As anticipated, and confirmed in stakeholder  
46 consultations, the main concern for local Pakistani women was the availability of culturally  
47 appropriate services.[20] Thus the need for single sex PA group sessions was of paramount  
48 importance in adapting the NLNY intervention for this population. It was also evident that  
49 assessment events would need to be restricted to women only and would need to be conducted in  
50 community venues that were convenient and where possible familiar to the women. In addition the  
51  
52  
53  
54  
55  
56  
57  
58  
59  
60

1  
2  
3 commissioners anticipated that the women might be more likely to respond to trainers who had an  
4 appreciation of their Islamic cultural heritage and were able to commission a suitable provider and  
5 provide some funding for intervention specific provider training.  
6  
7

### 8 **Intervention**

9  
10 The intervention that was provided for the Pakistani women was delivered through a Community  
11 Interest Company (CIC). The CIC was founded and registered by three local women (two of Pakistani  
12 and one of Arabic heritage) who are directors of the company (NUR FITNESS CIC registration number  
13 08143445 <http://www.bis.gov.uk/cicregulator>). The intervention was delivered by one CIC founder  
14 member, who recruited other local Pakistani women to assist with intervention delivery. These  
15 women received training to qualify as fitness trainers or in some cases training to deliver the  
16 nutritional aspects of the intervention. The researcher and the project manager also provided  
17 training for the delivery staff that was specific to the NLNY intervention, including data collection  
18 procedures, use of behavioural change techniques and information regarding the relevant NICE  
19 guidance [1]. The NHS commissioners provided funding and facilitated these training opportunities.  
20  
21

22  
23 Participants were recruited to the adapted NLNY intervention for Pakistani women through women-  
24 only assessment events that were organised by the project manager in consultation with the  
25 intervention delivery staff and community health champions (members of the community who have  
26 received training to promote health messages locally). These events took place in community venues  
27 in the areas of the town partly populated by the Pakistani community. Initial individual risk  
28 assessment was based on FINDRISC scores. [13] [21] Other data were collected at the assessment  
29 events, including self-report PA and dietary data. Follow-up assessments, as part of the service  
30 delivery and feasibility evaluation, were planned at six and 12 months.  
31  
32

33  
34 Women recruited to the intervention took part in an eight week programme of weekly sessions,  
35 delivered to groups of between 10 and 20 women. The sessions and comprised approximately 60  
36 minutes of supervised group PA followed by 30 minutes of reflection and advice centred on dietary  
37 information and action planning. Participant received a booklet, written in English that included  
38 information, goal setting and action planning prompts with space for recording their progress. The  
39 information provided about a healthy diet was specifically tailored to the participant group,  
40 incorporating their preferred foods and cooking styles. The participants were also able to access  
41 additional PA sessions at different times of the week, delivered by the same provider (NUR FITNESS  
42 CIC). These additional sessions were made available to participants both alongside and following the  
43 eight week course. These sessions were provided at no cost to the participants for up to six months  
44 and later at low cost. Most of the activity sessions were delivered in community halls, including  
45  
46  
47  
48  
49  
50  
51  
52  
53  
54  
55  
56  
57  
58  
59  
60

1  
2  
3 school halls. In the early stages of the programme the women had access to a community gym,  
4 where their exclusive use was assured for some mornings, but this facility was later closed.  
5  
6

7 The provider ensured that information about different sessions was easily available and regularly  
8 updated. This was facilitated via a social networking page (i.e. Facebook) that the provider initiated;  
9 others relied on text messages, also from the provider, or accessed information by keeping in touch  
10 with other women participants.  
11  
12

### 13 **Design and participants**

14 We obtained ethical approval for the study from Newcastle University Ethics Committee (Number  
15 0447). All participants received information and gave written informed consent prior to taking part  
16 in the feasibility study and the interview study separately.  
17  
18  
19

20 For the qualitative interview study we purposively sampled participants to ensure representation  
21 from the three different areas of the town where early recruitment and intervention delivery took  
22 place. The interviews were scheduled early in the feasibility study, shortly after the first groups of  
23 women, all of whom were Pakistani, had completed their eight week intervention programmes. The  
24 NLNY evaluation team did not have access to participant contact details so the interview invitations  
25 and arrangements were made by the intervention delivery staff following guidance from the  
26 research team. The researcher who conducted the interviews did not know any of the participants  
27 prior to the interviews. Our previous work [9] and the Theoretical Domains Framework (TDF), [22] a  
28 framework that groups component constructs from relevant behavioural theories into theoretical  
29 domains, were used to inform the topic guide for this study. The topic guide was refined as the  
30 interviews progressed.  
31  
32  
33  
34  
35  
36  
37  
38  
39

### 40 **Data collection**

41 Group interviews involving two or at most three participants were planned to encourage  
42 participation and these were conducted in English language by the female researcher (LP, MSc,  
43 Research Associate). Resources for an interpreter were not available. The interviews were  
44 conducted in the community venues where the participants attended their PA sessions and were  
45 conducted in parallel with on-going sessions although always in a separate room. Interviews lasted  
46 between 60 and 75 minutes. As in previous work,[9] we allowed flexibility within the areas outlined  
47 in the topic guide and the women were encouraged to report what mattered to them. Active  
48 listening with prompts was employed to provide clarification and improve insight. Notes were made  
49 of related topics introduced by the participants and the topic guide was developed as the interviews  
50 progressed. All interviews were audio-recorded and transcribed, as close to verbatim as possible by  
51 staff in the Institute of Health and Society at Newcastle University who have transcription expertise.  
52  
53  
54  
55  
56  
57  
58  
59  
60

## Analysis

We used the Framework approach[23] for data analysis. Transcripts were read, checked, and imported into NVivo V9 [24] to facilitate coding. The themes emerging from the data were first classified according to the *a priori* theoretical domains identified from the TDF and included in the topic guide as: intentions and goals; reinforcement; knowledge; nature of the activity; social role and identity; social influences; capabilities and skills; behavioural regulation and decision; emotion; and environment. LP performed the initial classification according to the TDF themes and these were then checked by SUD, differences being resolved through discussion. The use of NVivo software and the TDF defined *a priori* categories facilitated the analysis and promoted familiarisation with the data. Further analysis of the data within each of the theoretical domains, and reference to an empirical phenomenology approach, [25] which is primarily about retaining the appreciation of the respondents' subjective world, led to the identification and agreement of cross cutting constructs.

## RESULTS

We conducted nine interviews (seven dyad interviews and two interviews with groups of three participants). All 20 interview participants were recruited from among the first 78 female Pakistani intervention recruits in three areas of the town (Breckon Hill, Abingdon and Green Lane), with ages ranging from 26 to 45 years and a mean of 33.5 years. For this group of interview participants, their baseline risk of future T2D based on FINDRISC score ranged from 11 to 22 with a mean score of 15. A FINDRISC score of 11 to 14 represents moderate risk, with one in six likely to develop T2D within ten years and a FINDRISC score of 15 to 20 represents high risk with two in six likely to develop T2D within 10 years. The participants' English Index of Multiple Deprivation (IMD) scores, based on their postcodes of residence, ranged from 11 to 78 with a mean IMD score of 43 (which ranks among the most deprived English quintile). IMD scores are an ecological, composite measure based on routinely available data in seven categories of deprivation assessed at the Lower Super Output Area (LSOA): a small administrative area with a population of about 1500. . Details of participant characteristics are shown in Table 1.

Some women were less confident in their use of English language than others and the women tended to organise themselves so that the interview groups included at least one participant who was confident in her own ability to express herself in English. Sometimes the women would converse briefly between themselves in their first language to check their use of English. Those who were more confident tended to speak more, although this was sometimes to clarify what the other person had said for the benefit of the researcher, who only spoke English. Quotes are assigned to groups



(Table 1) and where group discussion is reported we have used numerals (i, ii) to identify different speakers.

Within the *a priori* TDF domains, (intentions and goals, reinforcement, knowledge, nature of the activity, social role and identity, social influences, capabilities and skills, regulation and decision, emotion, and environment), we identified and analysed the anticipated themes relating to participants' own PA and dietary behaviours. We also identified three further cross-cutting themes which we have grouped as 'collateral health and social benefits'. These three composite themes related to participants' perspectives of (1) their psychological health, (2) their family role and responsibility for the health of others, and (3) an ethos of inclusion and accommodation of differences.

**Table 1: Participant baseline variables: group means**

| Group identifier        | Number in the group | Age (years) | FINDRISC score | IMD score * |
|-------------------------|---------------------|-------------|----------------|-------------|
| A                       | 2                   | 33          | 20             | 46          |
| B                       | 2                   | 30          | 12.5           | 52          |
| C                       | 2                   | 31          | 13             | 78          |
| D                       | 3                   | 35          | 15             | 69          |
| E                       | 2                   | 36          | 13             | 20.5        |
| F                       | 2                   | 40          | 14.5           | 37          |
| G                       | 3                   | 32          | 14             | 18          |
| H                       | 2                   | 29          | 14.5           | 29.6        |
| I                       | 2                   | 45          | 17             | 34.5        |
| <b>All participants</b> | 20                  | 34          | 15             | 43          |

\* a higher score indicates a higher level of deprivation

## Participants own physical activity and dietary behaviours

### *Intentions and goals*

Health concerns were frequently stated as a reason for taking part in the intervention and associated with an appreciation of the opportunity afforded by the availability of this intervention programme. There was an understanding of the increased diabetes risk associated with Asian ethnicity as described by one woman,

*'I just about got myself motivated that it's for health reasons ... especially with the diabetes... we as Asians, we get diabetes.'* (Group I).

1  
2  
3 Occasionally less explicitly health associated reasons would be mentioned such as,  
4

5 *'Because we will gonna be like fit and we are gonna be smart and look nice.'* (Group C)  
6  
7

8 The intervention documentation was organised by the provider to promote action planning.  
9 Participants were encouraged to write an action plan for themselves for the next week (such as drink  
10 a glass of water instead of a fizzy drink at lunchtime). This planning was recalled as explained in this  
11 quotation,  
12  
13

14 *'Every week we give a self-challenge, we are not going to do this, we are not going to eat this, we  
15 are going to eat something else.'* (Group C).  
16  
17

18 More generally goal setting was closely related to being part of the group and the need to engage  
19 with group activities,  
20  
21

22 *'We have to go to the classes: we try our best to go to classes.'* (Group A).  
23  
24

### 25 **Reinforcement**

26 Most of the reinforcement centred on feedback from other people, especially others in the group,  
27 for example,  
28  
29

30 *'It was pointed out that I was getting more defined on my waist and that was like really brilliant.  
31 It was a great motivator.'* (Group F)  
32  
33

### 34 **Knowledge**

35 Tailoring of dietary advice was much appreciated. There was frequent reporting of quantities of oil  
36 and salt to include in making home cooked curries, often introduced with an air of disbelief  
37 regarding how much oil and salt they had previously added to cooked food. They appreciated advice  
38 to reduce these quantities gradually so that the change in taste was less obvious, but they explained  
39 that as they became used to the different tastes they even preferred them.  
40  
41  
42  
43  
44

45 Perhaps surprisingly the risk effect of family history needed clarification, as explained here,  
46  
47

48 *'I know my uncle in Pakistani, he's got diabetes and his leg is quite bad actually. I didn't know, I  
49 didn't realise I would be at risk, because he's an uncle, he's not my dad and then it was quite a bit  
50 of a shock when they said no actually he's part of your family.'* (Group E).  
51  
52

### 53 **Nature of the activity, capabilities and skills**

54  
55  
56  
57  
58  
59  
60

1  
2  
3 There was a range of experience within this group of women. Many were quite new to the physical  
4 activities that were presented in the programme and were gradually attuned to them by the  
5 trainers, as explained by one woman,  
6  
7

8  
9 *'They proper explain it, they do exercise and they keep telling us as well both ways.'* (Group A)

10  
11 Generally the opportunity to participate in PA was valued and the women were pleased with what  
12 they had achieved. One woman described her effort and the beneficial effects she felt,  
13

14  
15 *'Trust me when I do work-out I'll be drenched, you know, and there's lots of ladies that really put*  
16 *the effort in, but it's like built your confidence.'* (Group G).  
17

### 18 19 **Social role and identity, and social influences**

20 These domains were particularly important for this group of Pakistani women and additionally  
21 contribute to the cross-cutting collateral benefits that we identified (detailed below). The women  
22 were mostly homemakers and mothers and often described themselves in relation to this role,  
23  
24

25  
26 *'You put yourself back and you give your children more.'* (Group F).  
27

28  
29 The social responsibility to provide hospitality was sometimes seen as detrimental to their progress  
30 in achieving a healthy lifestyle,  
31

32  
33 *'I have to buy some unhealthy foods in, just because it's the norm, people expect something like*  
34 *that on the table and what happens is, if I bought it in I'll end up eating it myself.'* (Group F).  
35

36  
37 There was an expectation that the CIC providers would understand and accept the social and cultural  
38 issues that were pertinent to this participant group, because the delivery staff themselves were from  
39 the Muslim community as described by one woman,  
40  
41

42  
43 *'Because she's [trainer] Asian as well, she knows how to change basically, she knows the things*  
44 *that Asians ...whereas English people have different diet to what Asians do, our diet is totally*  
45 *different, whereas she helped us a lot by telling us small changes that we could make in our daily*  
46 *intake of food and the like type of cooking that we could do.'*  
47  
48

49  
50 The appreciation of the efforts that were being made by the CIC providers who were known to many  
51 of the women participants was evident. This was described by one interviewee,  
52

53  
54 *'I think [they are] helping our Asian community ladies, especially the oldies to come out [of the*  
55 *house]. ... They give her [the trainer] blessing.'* (Group D).  
56  
57  
58  
59  
60

1  
2  
3 Recruitment by word of mouth was emphasised; people described how they had been encouraged  
4 to come by reassurance from those already engaged in the programme such as:  
5  
6

7 *'Friends are like encouraging you. 'no you have to come, you have to come,' just it helps*  
8 *socialising and get out as well, because you don't realise you can get out,' (Group G), and ' it*  
9 *really helps to have someone saying actually it's ok to come,' (Group B).*  
10  
11

12 The women also described how later on they themselves had encouraged others and become  
13 'champions' in promoting the intervention,  
14

15 *'And then after I tell them it's really nice, come you see, it's really, really nice' (Group B).*  
16  
17

### 18 **Regulation and decision**

19  
20 Regulation centred on attending the PA sessions, where prompts to attend were naturally provided  
21 as part of the women's usual routine. For example after taking the children to school the women  
22 could attend a session in an adjacent community venue.  
23  
24

25 *'Every Monday we go, [to the activity session] like half nine till half ten,' (Group C).*  
26  
27

28  
29 With regard to diet there was some appreciation of the need for portion size control, for example by  
30 using a smaller plate. Sweet fizzy drinks were perceived as addictive, therefore difficult to regulate  
31 and better avoided. The dietary advice offered included information about reading food labels,  
32 which was reported as helpful for making decisions about food choices. The fact that some sweet  
33 foods, specifically intended for Asian festivals, did not have nutrition labels was mentioned by some  
34 of the women participants.  
35  
36  
37

### 38 **Emotion**

39  
40 Worry about the risk of diabetes, because of family members with the disease, and concern for  
41 relatives already suffering from diabetic complications was often mentioned, sometimes with regret  
42 for those who had not been able to make beneficial lifestyle changes. Retinopathy was specifically  
43 mentioned where it had affected younger aged relatives to the detriment of their quality of life.  
44  
45  
46

47  
48 There was also some mention of possible embarrassment about going to the gym, described as,  
49

50 *'Making a fool of myself,' (Group E)*  
51  
52

53 In contrast the enjoyment experienced by participating in the activity sessions was often mentioned.  
54

55 *'We have a good laugh and we have good things.'(Group C)*  
56  
57  
58  
59  
60

1  
2  
3 *But then the time flies by, you don't realised where the time has gone and you had a workout, but*  
4 *you had a laugh.'* (Group E)

5  
6  
7 *It's the motivation of seeing each other and as well as having a laugh, you enjoy your time here.'*  
8  
9 (Group B)

### 10 11 **Environment**

12 The main environmental issue, as anticipated for this population group, was the provision of a  
13 female only facility. This is a broader criterion than just a single room, for example in a leisure  
14 centre, set aside for an hour. This requirement includes access to changing and toilet facilities with  
15 reassurance that the area would be securely restricted to women during the sessions and no man  
16 would accidentally just walk in. There were also environmental issues of concern around the cold  
17 weather and the cost of attending sessions (once the free and subsidised period had expired).

18  
19  
20  
21  
22  
23 *'It's so cold. At the moment I've stopped walking because it's cold.* (Group A)

24  
25  
26 *'In the park all friends go together but sometimes I said I don't want to go 'it's too cold'* (Group D)

27  
28 *'You have to look at it from the financial point of view, how much is the charge going to be? If I*  
29 *want to come three times a week how much is that going to be?* (Group F)

30  
31  
32 *'Everything is expensive nowadays, just your basic household things cost an arm and a leg, so*  
33 *money is a big issue, but I think just for fitness the prices that they've got now are reasonable'*  
34  
35 (Group H)

### 36 37 38 **Collateral health and social benefits**

#### 39 40 **Psychological health**

41 Participants' perspectives of their psychological health involve sub-themes relating to, 'safety and  
42 freedom' (cultural acceptance and feeling comfortable) and 'positive affect' (feeling happier, less  
43 isolated, and not depressed).

44  
45  
46  
47 Reference to Islamic culture used in recruitment strategies was influential, as described by one  
48 participant,

49  
50  
51 *'The advert [Radio Ramadan] was talking Islamic, like people in Islam history, the women. In*  
52 *those days women were like quite fit and strong and they had to be and that's what got me in [to*  
53 *the programme]* (Group D).  
54  
55  
56  
57  
58  
59  
60

1  
2  
3 Similar references were used by the community provider during the sessions and contributed to the  
4 engagement strategies. This was reflected in perspectives of cultural acceptance that made the  
5 women comfortable,  
6  
7

8  
9 *'You know the instructor... and sometimes they talk in our own language and we just do jokes.'*  
10 (Group A)  
11

12 Feeling safe and comfortable was a regular and much emphasised theme, as described clearly by  
13 members of one group,  
14

15  
16 *'i) It's easy for me to say, 'I'm going to a ladies only gym, there's no men there,' and I know there*  
17 *will be no disapproval from the male side of our family.*  
18

19 *ii) I felt like the whole mental pressure was lifted because I could justify to anyone that I am in an*  
20 *entirely female environment.*  
21

22 *i) He [husband] is in the mind that my wife is in a safe environment. ii) It is completely peaceful in*  
23 *mind. (Group F)*  
24  
25  
26

27 The relief from anxiety was expressed by one participant as,  
28

29  
30 *'You can just do exercise, you are not like wary - is anyone [male] suddenly going to walk through*  
31 *the door.'* (Group D)  
32  
33

34 Other aspects of feeling safe were about confidence to exercise. For example,  
35

36  
37 *'That's what they teach you, 'listen to your own body', whatever your body allows you go to that*  
38 *speed and level. With me being a blood pressure patient..... Absolutely I found no fear, no worry*  
39 *and I was in a good safe environment.'* (Group F).  
40  
41

42 The purposeful social grouping, and the opportunity this presented for women to talk together and  
43 support each other appeared to promote greater confidence within participants' perceived role: as  
44 described by one woman when talking about cooking for the family,  
45  
46

47  
48 *'if you are the main cook then it's part of your role, if you got the knowledge [re: healthy food*  
49 *choices] (Group G)*  
50

51 Another woman talked about cooking for her husband,  
52

53  
54 *'When I go home I say, 'I'm going to cook and you are going to eat, this is how I am going to*  
55 *cook.' Husband was a bit like, you know, like it is -isn't it? 'Ah, you are not going to cook like that?'*  
56 *'Oh yes I am, but it will taste nice.'* (Group F).  
57  
58  
59  
60

1  
2  
3 There were also explicit references to depression and isolation such as,  
4

5 *'She [relative] spent time at home a lot and I think a lot of depression got to her' (Group E)*  
6  
7

8 Contrast was made between this relative's experience and the beneficial effect they perceived  
9 through the option to participate in appropriate social meeting.  
10

11 Two women in another group discussed depression in explicit relation to the intervention and the  
12 difference participation in a social and active group made to them in comparison to their previous  
13 behaviours.  
14  
15

16  
17 *'i) If you stay home all day obviously it's different isn't it? I was very, very lazy. I didn't used to go*  
18 *out. I just used to stay at home all the time.*  
19

20  
21 *ii) Watch TV.*

22 *i) Watch TV and just do the housework and just eat. Sit down in one place. So now I am very*  
23 *active. This year we got the choice to get depressed or to go out and get fresh'. (Group A).*  
24  
25

26 Another woman talked about how she had lived in the area for six years, but previous to joining the  
27 programme had only known one friend. She explained how she had now been welcomed by the  
28 group and how she communicated with other women outside the sessions, such as about transport  
29 arrangements to get to classes where needed.  
30  
31  
32

### 33 **Family role and responsibility for the health of others**

34 The women's pivotal role within the family as the main cook was perceived as conveying a  
35 responsibility for their family's health that was often explained such as,  
36  
37

38  
39 *'We have responsibility, we doing the shopping, we bring all the best things back for them' (Group*  
40 *D).*  
41  
42

43 In relation to this there were clear statements that the knowledge and support the women had  
44 received through the programme would empower them to make healthy changes for their own  
45 benefit with the added consequence of influencing other family and community members. One  
46 person clearly spoke about this as:  
47  
48  
49

50  
51 *'By educating the women I think what you are doing is you are empowering the women to sort of*  
52 *make decisions, informed decisions 'cos they know that, 'this is right', this is wrong'. Then they are*  
53 *in turn helping their younger, and extended elders.'* (Group F)  
54  
55

56 Similarly another woman described how her perception of responsibility had changed,  
57  
58  
59  
60

1  
2  
3 *'Now I go outside [of the house, to the sessions] I know what to do to my child you see. I want*  
4 *to give good things you know.'* (Group D)  
5  
6

7 A description of specific changes was supplied by another group,  
8

9 *'We have stopped biscuits, we stopped cakes, we stopped crisps, we stopped everything, even*  
10 *we stopped white bread as well, we start brown bread and everything like brown rice.'*  
11  
12

13 This confidence to change extended to encouraging their children to exercise and even jokingly to  
14 the possibility that they might influence their husbands as explained in discussion with laughter  
15 by one group,  
16  
17

18 *'i) I wanna send mine [husband].*  
19

20 *ii) Yeah, I said to mine, 'Get out there'.*  
21

22 *i) They are jealous wasn't it, looking at us, and now, 'Look we [imagining husbands' speaking]*  
23 *need to work out.'* (Group G).  
24  
25

26 There was also an appreciation by the women of the way their own health would impact on others  
27 as explained in the following,  
28  
29

30 *'I'm the one that makes – does everything, if for some reason my health suffers then everyone*  
31 *else in our family suffers.'* (Group E)  
32  
33

### 34 **An ethos of inclusion and accommodation of differences**

35 The Pakistani women within this group had a range of faith related preferences. A particular  
36 example was that some women did not want to participate in activities that involved music and the  
37 other women in the activity group were encouraged, by the trainer, to respect and accommodate  
38 these wishes so the issue was resolved. This issue and its resolution were reported by one or two  
39 groups,  
40  
41  
42

43 *'Then [the trainer] said, 'No, they don't like music on' then [everyone] agree as well. They said,*  
44 *'Oh you are so kind, because we don't like music.'* (Group C).  
45  
46  
47

48 Although this intervention targeted ethnic minority participants, the additional PA sessions run by  
49 the community provider were open to other paying customers and attracted a few of the local  
50 women from the white population, who were welcomed as described by one woman,  
51  
52

53 *'Four white women were there and we had such a laugh with them as well, you know trying to*  
54 *speak our lingo and we were like, we tried like, the one that do speak English they are trying to*  
55 *say their words... we are having a laugh and everything'* (Group E).  
56  
57  
58  
59  
60



1  
2  
3 This inclusivity was similarly described by another group,  
4

5 *'i) The more the merrier and I think as long as it is women only it doesn't matter what ethnicity or*  
6 *what race or what age, we don't care .*

7  
8 *ii) I'm sure women from non-Muslim background they will probably feel intimidated by gyms*  
9 *anyway and they might find coming to a women only gym- Wow this is great!' (Group F).*  
10  
11

12 The women themselves even encouraged wider participation,  
13

14  
15 *'I've been recommending it to lots of Asians [and] English ladies, because they [all] like Bollywood*  
16 *music don't they?' (Group G).*  
17  
18

19 The appreciation of issues that would be common to all women was described by one group  
20 member as,  
21

22  
23 *'When women work together from different cultures we all find that we have the same fears, the*  
24 *same sort of issues about our bodies and how we want to look better'(Group F) .*  
25  
26

## 27 **DISCUSSION**

### 28 **Main findings**

29  
30 The NLNY intervention is unusual in being centred on group delivered PA sessions. The Pakistani  
31 women's appreciation of the opportunity to engage in group delivered PA sessions in a culturally  
32 appropriate and socially supportive environment was an important finding. This qualitative study  
33 suggests that provision of culturally appropriate PA sessions will facilitate the engagement of  
34 Pakistani women and encourage their PA and dietary behaviour change. The study results emphasise  
35 the importance of social influences and the women's own perceived social role and identity for  
36 intervention development. The fact that the delivery staff were from the local Pakistani women's  
37 own community contributed to recruitment and engagement of the participants.  
38  
39

40  
41 The engagement of Pakistani women in this culturally acceptable, social and proactively healthful  
42 context may have important health and social benefits in addition to those specifically intended by  
43 the intervention. We have described these unanticipated additional effects as 'collateral health and  
44 social benefits' and they comprise: a potential positive impact on the women's own psychological  
45 health including reduction in feelings of isolation and depression; improved knowledge and  
46 confidence with which to fulfil their perceived role as having responsibility for providing healthy food  
47 for their families and thus encouraging healthy lifestyles in their children; and an ethos of  
48 accommodation for the range of different cultural variation within local groups of women.  
49  
50  
51  
52  
53  
54  
55  
56  
57  
58  
59  
60

### Strengths and limitations

This qualitative study was conducted quite early in the life of the intervention programme, when the women had been involved in the intervention for less than six months. It was not clear whether early enthusiasm for the intervention would be sustained. The interviews were conducted in English, which was not the participants' first language. Although participants could all speak some English and were able to translate for each other to an extent, the accuracy of these translations remains unclear. The small group, mostly dyadic, format for conducting the interviews, and the fact that they took place alongside intervention sessions that the women would usually be attending, facilitated study engagement. The disadvantage of this was that the interview rooms were not very quiet and so some of the recordings were difficult for the staff undertaking the transcriptions. We were able to call on an experienced staff team to ensure the transcriptions were as accurate as possible. The interview arrangements were made by the intervention delivery staff, which could mean some bias in the choice of respondents, although we accessed women from different areas of the town and we were aware of a diverse range of cultural differences among Pakistani women who participated. The researcher who conducted the interviews was not Pakistani and only spoke English; however, the interviewees were open and friendly, keen to communicate their views and to do so in a way that could be understood beyond their cultural group. The group of women who took part in the interview study were aged from 27 years to 45 years and most were under 40 years of age. This is the younger age range of the typical target population for T2D prevention. We do not know how effective the intervention will be in attracting older women. There was some suggestion that these younger women might recruit older relations to take part in the intervention and it will be valuable to assess the recruitment age profile over time.

### Comparison with other studies and implications

The NICE guidance for risk identification and provision of preventive interventions for high-risk individuals included recommendations for adults aged 25 to 39 of South Asian ethnicity, who are not included in the NHS Health Checks programme.[1] The findings from a recent National Institute for Health Research (NIHR) Health Technology Assessment evidence synthesis confirmed the importance of adapting health promotion interventions for ethnic minority communities and suggested that adaptation decisions should be based on detailed understanding of the target community.[16] Our plans for the adaptation of the NLNY intervention [10 26] to engage people from the local ethnic minority communities were therefore appropriate. The service commissioners took the lead in convening an operational group that included representation from the evaluation team. The commissioners were able to expand existing community links. Members of the local

1  
2  
3 ethnic minority communities were invited to a dissemination seminar that was arranged to promote  
4 the NLNY intervention in its original format and invite interest in the adaptation.  
5  
6

7 In the interview study reported here we sought to explore Pakistani female participants' views and,  
8 particularly in preparing the topic guide, we were able to draw on information from our qualitative  
9 evaluation within the original NLNY intervention.[9] In the original NLNY intervention, community  
10 based recruitment was successful, with 218 participants recruited to the programme from 367  
11 registers of interest in under two years. The benefit of community based recruitment procedures  
12 was also experienced in the PODOSA trial.[27] Early indications from this interview study suggest the  
13 potential of community based recruitment strategies for Pakistani Women. The adapted NLNY  
14 intervention was unusual in being provided through a CIC.[28] It was evident that some of the  
15 women interviewed knew the intervention providers and that this positively affected their  
16 confidence and decision to participate.  
17  
18  
19  
20  
21  
22

23 The social support engendered by the nature of the intervention was evident, as it was in the  
24 original NLNY intervention, and this reflects the more general literature around social support and  
25 behaviour change.[29] The social needs of this specific participant group to undertake various  
26 physical activities were of paramount importance for their engagement and confidence to become  
27 involved in the intervention. Whereas other interventions may be counselling based, whether this is  
28 individually or group delivered, NLNY centres on group delivered PA, which is provided as a  
29 fundamental pre-requisite of experiential learning. The provision of occasional female only sessions  
30 in local authority leisure centres does not constitute ideal provision of appropriate facilities (for  
31 example if the toilets are in common areas). In this feasibility phase the provision of staff training so  
32 that women from the Pakistani community could conduct PA sessions in appropriate and convenient  
33 community venues, including school premises, was of immediate importance for the continued  
34 intervention delivery.  
35  
36  
37  
38  
39  
40  
41  
42

43 The identification of beneficial effects on other aspects of participants' own health that may result  
44 from their participation in PA intervention delivered in social groups and the 'spill over' effects of  
45 health promotion on other family members is supported by other evidence. [30-33] This additional  
46 benefit may have importance for health economic evaluation of interventions designed to promote  
47 increased PA, especially where these are delivered to groups that are organised to promote social  
48 support networks.  
49  
50  
51  
52  
53

#### 54 **Unanswered questions and future research**

55 The feasibility study of the adapted version of the NLNY intervention, which was planned to better  
56 engage members of the local ethnic minority communities, is on-going and we plan to analyse the  
57  
58  
59  
60

1  
2  
3 recruitment, retention and outcomes at 12 months follow-up by sex and ethnic group. The entire  
4 feasibility study, together with our previous work relating to the original NLNY intervention[8] and  
5 the related qualitative studies, including the interview study reported here, [9] will inform plans for  
6 optimisation of the intervention and options for definitive evaluation of the NLNY intervention for  
7 effectiveness and cost effectiveness.  
8  
9  
10  
11  
12  
13  
14  
15  
16  
17  
18  
19  
20  
21  
22  
23  
24  
25  
26  
27  
28  
29  
30  
31  
32  
33  
34  
35  
36  
37  
38  
39  
40  
41  
42  
43  
44  
45  
46  
47  
48  
49  
50  
51  
52  
53  
54  
55  
56  
57  
58  
59  
60

For peer review only

### Acknowledgements

We thank the participants in the adapted version of the New life, New you intervention, particularly those who gave their time for these interviews. We thank the project implementation team including NHS health promotion staff and intervention delivery staff, especially Claire Robinson and Shazia Noor.

### Funding

Integral to the London 2012 Olympic and Paralympic Games was the aspiration that the Games would encourage more people across the UK to participate in physical activity. In the North East of England this Olympics vision and the regional health strategy provided the foundation for the 'New life, New you' intervention that was originally funded as a 2012 Olympic Legacy Project by a consortium including: Sport England, Middlesbrough Council, Middlesbrough Primary Care Trust, the North East Strategic Health Authority. The adapted version of the New life, New you intervention was designed to better engage the local ethnic minority community and funded by Middlesbrough Primary Care Trust. MW and FFS are funded in part by the British Heart Foundation, Cancer Research UK, the Economic and Social Research Council, Medical Research Council and National Institute of Health Research (NIHR) as director and senior investigator respectively of Fuse - the Centre for Translational Research in Public Health, which is a UKCRC Public Health Research Centre of Excellence. The funders had no role in study design, data collection and analysis, decision to publish, or preparation of the manuscript. The views expressed herein are those of the authors and not necessarily those of the above named funders or UKCRC.

### Authors' contributions

MW was a member of the Steering Group responsible securing funding and for the outline plan for the original NLNY intervention and evaluation. LP contributed to the development of the NLNY pilot intervention and designed the feasibility evaluation. Adaptation of the NLNY intervention was later planned to better engage local ethnic minority communities. This interview study was planned by LP as part of the evaluation of the adapted NLNY intervention. LP conducted the interviews. FFS, SUD and MW provided advice on the analysis. LP conducted the preliminary analysis which was then discussed and agreed with SUD. MW, FFS and SUD, reviewed, and contributed to the manuscript drafted by LP. All authors read and agreed the final version.

### Competing interests

The business case and outline plan for the original 'New life, New you' study was determined by a steering committee. This included representatives from members of the organisations that comprised the funding consortium as well as the Principal Investigator for the evaluation, co-author MW. The detailed development of the intervention was then progressed by a small operational team including the evaluation researcher, co-author LP. The adapted version of the New life, New you intervention was funded by Middlesbrough PCT. The funders had no role in the collection, analysis, and interpretation of data, the writing of the article and a decision to submit it for publication. Co-authors: MW, FS, SD and LP receive salaries from Newcastle University, Institute of Health and Society that provide open access funding for the publication. The authors declare that they have no other competing interests.

**Data sharing**

no additional data available

**Abbreviations**

CIC Community Interest Company

FINDRISC Finnish Diabetes Risk Score

IMD UK Government Statistics index of multiple deprivation

NICE UK National Institute for Health and Care Excellence

NLNY 'New life, New you' intervention

T2D Type 2 diabetes

TDF Theoretical Domains Framework of behaviour change

**REPS UK Register of exercise professionals**

## References

1. NICE. PH 38 Preventing type 2 diabetes - risk identification and interventions for individuals at high risk. 2012. <http://guidance.nice.org.uk/PH38> (accessed 17/09/2013).
2. Forouhi NG, Merrick D, Goyder E, et al. Diabetes prevalence in England, 2001—estimates from an epidemiological model. *Diabetic Medicine* 2006;**23**(2):189-97 doi: 10.1111/j.1464-5491.2005.01787.x[published Online First: Epub Date]].
3. Pollard TM. Ethnic Groups as Migrant Groups: Improving Understanding of Links Between Ethnicity/Race and Risk of Type 2 Diabetes and Associated Conditions\*. *Annual Review of Anthropology* 2011;**40**(1):145-58 doi: doi:10.1146/annurev-anthro-081309-145719[published Online First: Epub Date]].
4. Knowler WC, Barrett-Connor E, Fowler SE, et al. Reduction in the incidence of type 2 diabetes with lifestyle intervention or metformin. *New England Journal of Medicine* 2002;**346**(6):393-403
5. Tuomilehto J, Lindstrom J, Eriksson JG, et al. Prevention of type 2 diabetes mellitus by changes in lifestyle among subjects with impaired glucose tolerance. *New England Journal of Medicine* 2001;**344**(18):1343-50
6. Costa B, Barrio F, Cabré JJ, et al. Delaying progression to type 2 diabetes among high-risk Spanish individuals is feasible in real-life primary healthcare settings using intensive lifestyle intervention. *Diabetologia* 2012:1-10 doi: 10.1007/s00125-012-2492-6[published Online First: Epub Date]].
7. Jain SH, Horton ES, (Editors) KK. Advancing the Science and Practice of Diabetes Prevention. *American Journal of Preventive Medicine* 2013; **44**,(4 Supplement 4):A1-A4, S297-S400
8. Penn L, Ryan V, White M. Feasibility, acceptability, and outcomes at 12 months follow-up of a novel community based intervention to prevent type 2 diabetes in adults at high risk: mixed methods pilot study. *BMJ Open* 2013
9. Penn L, Dombrowski SU, Sniehotta FF, et al. Participants' perspectives on making and maintaining behavioural changes in a lifestyle intervention for type 2 diabetes prevention: a qualitative study using the theory domain framework. *BMJ Open* 2013;**3**(6) doi: 10.1136/bmjopen-2013-002949[published Online First: Epub Date]].
10. Penn L, Lordon J, Lowry R, et al. Towards the translation of research evidence to service provision: experience from North East England, UK. In: Peter Schwarz, ed. *Diabetes Prevention in Practice*. Dresden, 2010.
11. Neighbourhoods Statistical Release. The English Indices of Deprivation 2010. In: Department for Communities and Local Government, ed. <http://www.statistics.gov.uk>: Crown Copyright, 2011.
12. Sport England. Active People Survey 1. Secondary Active People Survey 1 2007. <http://www.sportengland.org/>.
13. Lindstrom J, Tuomilehto J. The diabetes risk score: a practical tool to predict type 2 diabetes risk. *Diabetes Care* 2003;**26**(3):725-31
14. Kolb D A. *Experiential learning : experience as the source of learning and development* Englewood Cliffs, N.J. : Prentice-Hall 1984.
15. Office for National Statistics UK. Middlesbrough Local Authority. 2013. <http://www.neighbourhood.statistics.gov.uk>.
16. Liu J, Davidson E, Bhopal R, et al. Adapting health promotion interventions to meet the needs of ethnic minority groups: mixed-methods evidence synthesis. *Health Technol Assess* 2012;**16**(44)
17. Netto G, Bhopal R, Lederle N, et al. How can health promotion interventions be adapted for minority ethnic communities? Five principles for guiding the development of behavioural interventions. *Health Promotion International* 2010;**25**(2):248-57
18. Samsudeen BS, Douglas A, Bhopal RS. Challenges in recruiting South Asians into prevention trials: Health professional and community recruiters' perceptions on the PODOSA trial. *Public*

- 1  
2  
3 Health 2011;**125**(4):201-09 doi: <http://dx.doi.org/10.1016/j.puhe.2011.01.013>[published  
4 Online First: Epub Date]].
- 5 19. MRC (Medical Research Council UK). Developing and evaluating complex interventions: new  
6 guidance. 2008;  
7 <http://www.mrc.ac.uk/Utilities/Documentrecord/index.htm?d=MRC004871>.  
8 [www.mrc.ac.uk/complexinterventionsguidance](http://www.mrc.ac.uk/complexinterventionsguidance) (accessed 17/09/2013).  
9
- 10 20. Babakus W, Thompson J. Physical activity among South Asian women: a systematic, mixed-  
11 methods review. *International Journal of Behavioral Nutrition and Physical Activity*  
12 2012;**9**(1):150
- 13 21. Davies M, Khunti K, Chauhan U, et al. The handbook for vascular risk assessment, risk reduction  
14 and risk management: University of Leicester, 2008.
- 15 22. Francis J, O'Connor D, Curran J. Theories of behaviour change synthesised into a set of  
16 theoretical groupings: introducing a thematic series on the theoretical domains framework.  
17 *Implementation Science* 2012;**7**(1):35
- 18 23. Ritchie J, Lewis J, editors. *Qualitative research practice: a guide for social science students and*  
19 *researchers*. London: Sage Publications, 2003.
- 20 24. QSRInternational. NVivo 9. 2012
- 21 25. Aspers P. Empirical Phenomenology: A Qualitative Research Approach (The Cologne Seminars).  
22 *Indo-Pacific Journal of Phenomenology* 2009;**9**(2)
- 23 26. Penn L, Lordon J, Lowry R, et al. Translating research evidence to service provision for prevention  
24 of type 2 diabetes: development and early outcomes of the 'New life, New you' intervention,.  
25 *British Journal of Diabetes and Vascular Disease* 2011;**11**(4):175 - 81
- 26 27. Douglas A, Bhopal R, Bhopal R, et al. Recruiting South Asians to a lifestyle intervention trial:  
27 experiences and lessons from PODOSA (Prevention of Diabetes & Obesity in South Asians).  
28 *Trials* 2011;**12**(1):220
- 29 28. Community Interest Companies. Department for Business, Education and Skills,. 2013. (accessed  
30 17/09/2013).
- 31 29. Absetz P, Valve R, Oldenburg B, et al. Type 2 diabetes prevention in the "real world": one-year  
32 results of the GOAL Implementation Trial. *Diabetes Care* 2007;**30**(10):2465-70
- 33 30. Basu A, Meltzer D. Implications of spillover effects within the family for medical cost-  
34 effectiveness analysis. *Journal of Health Economics* 2005;**24**(4):751-73
- 35 31. Falba TA, Sindelar JL. Spousal concordance in health behavior change. *Health Services Research*  
36 2008;**43**(1 P1):96-116
- 37 32. Goebbels AFG, Lakerveld J, Ament AJHA, et al. Exploring non-health outcomes of health  
38 promotion: The perspective of participants in a lifestyle behaviour change intervention.  
39 *Health policy (Amsterdam, Netherlands)* 2012;**106**(2):177-86 doi:  
40 <http://dx.doi.org/10.1016/j.healthpol.2012.04.005>[published Online First: Epub Date]].
- 41 33. Gorin AA, Wing RR, Fava JL, et al. Weight loss treatment influences untreated spouses and the  
42 home environment: Evidence of a ripple effect. *International Journal of Obesity*  
43 2008;**32**(11):1678-84  
44  
45  
46  
47  
48  
49  
50  
51  
52  
53  
54  
55  
56  
57  
58  
59  
60



1  
2  
3  
4 **PERSPECTIVES OF UK PAKISTANI WOMEN ON THEIR BEHAVIOUR CHANGE TO**  
5 **PREVENT TYPE 2 DIABETES: QUALITATIVE STUDY USING THE THEORY DOMAIN**  
6 **FRAMEWORK**  
7  
8

9  
10 Linda Penn,<sup>1,2</sup> Stephan U Dombrowski,<sup>3</sup> Falko F Sniehotta,<sup>1,2</sup> Martin White<sup>1,2</sup>  
11

12 <sup>1</sup> Institute of Health and Society, Newcastle University, Baddiley Clark Building, Richardson  
13 Road, Newcastle upon Tyne, NE2 4AX, UK.  
14

15 <sup>2</sup> Fuse, UKCRC Centre for Translational Research in Public Health  
16  
17

18 <sup>3</sup> School of Natural Sciences, Division of Psychology, University of Stirling, FK9 4LA  
19  
20  
21  
22  
23

24 Linda Penn, Research Associate (corresponding author): [linda.penn@ncl.ac.uk](mailto:linda.penn@ncl.ac.uk)  
25  
26

27 Stephan U Dombrowski, Lecturer in Health Psychology: [s.u.dombrowski@stir.ac.uk](mailto:s.u.dombrowski@stir.ac.uk)  
28  
29

30 Falko F Sniehotta, Reader in Health Psychology: [falko.sniehotta@ncl.ac.uk](mailto:falko.sniehotta@ncl.ac.uk)  
31  
32

33 Martin White, Professor of Public Health: [martin.white@ncl.ac.uk](mailto:martin.white@ncl.ac.uk)  
34

35 **Key Words**

36 Behaviour change

37 Community

38 Cultural adaptation

39 Ethnicity

40 Intervention

41 Type 2 diabetes

42 Intervention

43 Pakistani

44 Physical activity

45 Prevention

46 South Asian

47 Qualitative

48 **Word count = words**  
49  
50  
51  
52  
53  
54  
55  
56  
57  
58  
59  
60

## ABSTRACT

### Background

Type 2 diabetes (T2D) is a debilitating disease, highly prevalent in UK South Asians, and preventable by lifestyle intervention. The 'New life, New you' (NLNY) physical activity (PA) and dietary intervention for T2D prevention was culturally adapted to better engage minority ethnic populations and tested for feasibility.

### Objectives

To investigate Pakistani women participants' perspectives of their behaviour change and of salient intervention features.

### Setting

A community based eight-week programme of group delivered PA sessions with behavioural counselling and dietary advice, culturally adapted for ethnic minority populations, in an area of socioeconomic deprivation. Participants to NLNY were recruited through screening events in community venues across the town.

### Participants

Interviews were conducted with twenty Pakistani women NLNY participants, aged 26-45 (mean 33.5) years, from different parts of town.

### Results

Within the *a priori* TDF domains, (intentions and goals, reinforcement, knowledge, nature of the activity, social role and identity, social influences, capabilities and skills, regulation and decision, emotion, and environment), we identified the importance of social factors relating to participants' own PA and dietary behaviour change. We also identified cross-cutting themes as collateral benefits of the intervention including: participants' 'psychological health'; 'responsibility' (for others' health, especially family members included in the new PA and diet regimes); and 'inclusion' (an ethos of accommodating differences).

### Conclusions

Our findings suggest that culturally adapted interventions for Pakistani women at risk of T2D, delivered via group PA sessions with counselling and dietary advice, may encourage their PA and dietary behaviour change, and have collateral health and social benefits. The NLNY intervention appeared to be acceptable. We plan to evaluate recruitment, retention and likely effect of the intervention on participant behaviour prior to definitive evaluation.

## ARTICLE SUMMARY

### Article focus

The 'New life, New you' lifestyle intervention for diabetes prevention was culturally adapted for local Pakistani women and tested for feasibility. In an interview study we sought intervention participants' perspectives:

- On their behaviour change
- On the intervention procedures and cultural adaptations

### Key messages

- We identified the importance of several social factors, relating to participants' engagement in the intervention and their physical activity and dietary behaviour change
- Participants reported intervention benefits regarding their psychological health and positive affect
- Participants expressed responsibility for improving their family's lifestyle and the intention to apply learning from the intervention

### Strengths and limitations

This qualitative study:

- Highlighted cultural adaptations needed to engage Pakistani women in a lifestyle intervention
- Identified unanticipated intervention benefits
- Was limited by data collection early in the intervention timescale and the small study size

## BACKGROUND

Type 2 diabetes (T2D) is a debilitating disease that carries an increased risk of eye, kidney, nerve, and vascular disease with decreased life expectancy.[1] Prevalence of T2D is greater in UK residents of ethnic minority heritage than in the general UK population and the disease often occurs at an earlier age in these population groups.[2 3] Although there is good research evidence for the efficacy of lifestyle interventions for prevention of T2D,[4 5] translation of such evidence to service provision remains challenging. [6 7] The UK National Institute for Health and Care Excellence (NICE) guidance for risk identification and preventive interventions for high-risk individuals was published in July 2012.[1] This NICE guidance addresses the need to provide services, including risk assessment for those aged 25 to 39 years who are not included in the National Health Service (NHS) Health Checks programme. The need to provide risk assessment and preventive opportunities for younger\_ adults

younger than those included in the NHS Health checks is particularly relevant for ethnic minorities.[1]

The 'New life, New you' (NLNY) intervention for primary prevention of T2D was developed in Middlesbrough and has to date been evaluated through a feasibility study.[8-10] According to UK government statistics, Middlesbrough ranks as one of the ten most deprived areas in England based on the index of multiple deprivation (IMD) ranks of localities defined as lower super output areas (LSOA) within the town.[11] The original NLNY intervention primarily targeted middle and older aged adults in low income groups, priority groups identified using market segmentation of the Sport England Active People survey.[12] The NLNY intervention was designed to be delivered in leisure and community settings and to recruit participants directly from the community, rather than relying on a health services referral route. Recruits to the NLNY intervention were assessed for individual risk of future T2D, using the Finnish diabetes risk score (FINDRISC).[13] The NLNY intervention promoted increased physical activity, healthy eating and weight loss, in line with the UK National Institute for Health and Care Excellence (NICE) guidance.[1] The intervention was delivered through an eight week programme of weekly supervised physical activity sessions, each followed by reflection, behavioural counselling and advice, with ongoing support and follow-up assessment at six and 12 months.[14] Details of the original NLNY intervention feasibility study has been published.[8 10] We have described the design of the eight week programme in terms of experiential learning, which emphasises the central role of a 'here and now' experience (in this case experience of a physical activity) along with observation and reflection in promoting actions.[14]

In Middlesbrough minority ethnic communities comprise about 9% of the total population. The South Asian community is well established in the town and in 2011 comprised about 6.1 % of the total population (8461 of a total population of 138,700).[15] Most of the South Asians in Middlesbrough are of Pakistani heritage, although there are also people of Indian and Bangladeshi heritage. Other ethnic groups in Middlesbrough include Black African and Chinese communities. Although participants from ethnic minorities were not excluded from the original NLNY intervention, few were recruited. To better engage members of the local ethnic minority communities, we planned a cultural adaptation of the NLNY intervention. We also extended the age range of people that were eligible for the programme to include adults over 25 years with no upper age limit.[16 17] The feasibility study for the adapted NLNY intervention, for both men and women, is on-going. We are collecting recruitment data, including ethnicity and outcome data comprising weight and waist measurements along with self-report data on PA, diet, and quality of life at six and 12 months of follow-up in a before and after study.

1  
2  
3 Recruitment of South Asian participants to preventive interventions has proved difficult.[18] We  
4 anticipated that the cultural needs of Muslim women might deter their engagement in PA unless  
5 these needs were recognised and addressed. In this paper, we report a qualitative interview study  
6 that was conducted as part of the feasibility and acceptability evaluation of the adapted NLNY  
7 intervention, in line with the MRC guidance for the development and evaluation of complex  
8 interventions to improve health.[19] Women from the Pakistani community were early recruits to  
9 the adapted NLNY programme and this interview study was conducted at an early stage of the  
10 programme. We aimed to investigate Pakistani Women's perspectives of their behaviour change and  
11 salient features of the culturally adapted NLNY programme. We planned this investigation, along  
12 with other outcomes of the feasibility study, to subsequently inform the optimisation of the  
13 intervention via discussion with the commissioners. This feasibility assessment will also inform  
14 future options for a definitive evaluation of the adapted NLNY programme.  
15  
16  
17  
18  
19  
20  
21  
22

## 23 METHODS

24  
25 To develop the adapted intervention and its evaluation, the NHS commissioners convened an  
26 operational group that included community health champions as well as health and fitness workers.  
27 The adapted NLNY intervention was informed by mapping the distribution of ethnic minority  
28 communities within the Local Authority area, followed by stakeholder consultations. The project  
29 delivery was managed by an NHS health improvement specialist. One adaptation of the NLNY  
30 intervention specifically targeted Pakistani women. As anticipated, and confirmed in stakeholder  
31 consultations, the main concern for local Pakistani women was the availability of culturally  
32 appropriate services.[20] Thus the need for single sex PA group sessions was of paramount  
33 importance in adapting the NLNY intervention for this population. It was also evident that  
34 assessment events would need to be restricted to women only and would need to be conducted in  
35 community venues that were convenient and where possible familiar to the women. In addition the  
36 commissioners anticipated that the women might be more likely to respond to trainers who had an  
37 appreciation of their Islamic cultural heritage and were able to commission a suitable provider and  
38 provide some funding for intervention specific provider training.  
39  
40  
41  
42  
43  
44  
45  
46  
47  
48

### 49 Intervention

50 The intervention that was provided for the Pakistani women was delivered through a Community  
51 Interest Company (CIC). The CIC was founded and registered by three local women (two of Pakistani  
52 and one of Arabic heritage) who are directors of the company (NUR FITNESS CIC registration number  
53 08143445 <http://www.bis.gov.uk/cicregulator>). The intervention was delivered by one CIC founder  
54 member, who recruited other local Pakistani women to assist with intervention delivery. These  
55  
56  
57  
58  
59  
60

1  
2  
3 women received training to qualify as fitness trainers or in some cases training to deliver the  
4 nutritional aspects of the intervention. The researcher and the project manager also provided  
5 training for the delivery staff that was specific to the NLNY intervention, including data collection  
6 procedures, use of behavioural change techniques and information regarding the relevant NICE  
7 guidance [1]. The NHS commissioners provided funding and facilitated these training opportunities.  
8  
9

10  
11 Participants were recruited to the adapted NLNY intervention for Pakistani women through women-  
12 only assessment events that were organised by the project manager in consultation with the  
13 intervention delivery staff and community health champions (members of the community who have  
14 received training to promote health messages locally). These events took place in community venues  
15 in the areas of the town partly populated by the Pakistani community. Initial individual risk  
16 assessment was based on FINDRISC scores. [13] [21] Other data were collected at the assessment  
17 events, including self-report PA and dietary data. Follow-up assessments, as part of the service  
18 delivery and feasibility evaluation, were planned at six and 12 months.  
19  
20

21  
22 Women recruited to the intervention took part in an eight week programme of weekly sessions,  
23 delivered to groups of between 10 and 20 women. The sessions and comprised approximately 60  
24 minutes of supervised group PA followed by 30 minutes of reflection and advice centred on dietary  
25 information and action planning. Participant received a booklet, written in English that included  
26 information, goal setting and action planning prompts with space for recording their progress. The  
27 information provided about a healthy diet was specifically tailored to the participant group,  
28 incorporating their preferred foods and cooking styles. The participants were also able to access  
29 additional PA sessions at different times of the week, delivered by the same provider (NUR FITNESS  
30 CIC). These additional sessions were made available to participants both alongside and following the  
31 eight week course. These sessions were provided at no cost to the participants for up to six months  
32 and later at low cost. Most of the activity sessions were delivered in community halls, including  
33 school halls. In the early stages of the programme the women had access to a community gym,  
34 where their exclusive use was assured for some mornings, but this facility was later closed.  
35  
36

37  
38 The provider ensured that information about different sessions was easily available and regularly  
39 updated. This was facilitated via a social networking page (i.e. Facebook) that the provider initiated;  
40 others relied on text messages, also from the provider, or accessed information by keeping in touch  
41 with other women participants.  
42  
43  
44  
45  
46  
47  
48  
49  
50  
51  
52  
53  
54  
55  
56  
57  
58  
59  
60

### Design and participants

We obtained ethical approval for the study from Newcastle University Ethics Committee (Number 0447). All participants received information and gave written informed consent prior to taking part in the feasibility study and the interview study separately.

For the qualitative interview study we purposively sampled participants to ensure representation from the three different areas of the town where early recruitment and intervention delivery took place. The interviews were scheduled early in the feasibility study, shortly after the first groups of women, all of whom were Pakistani, had completed their eight week intervention programmes. The NLNY evaluation team did not have access to participant contact details so the interview invitations and arrangements were made by the intervention delivery staff following guidance from the research team. The researcher who conducted the interviews did not know any of the participants prior to the interviews. Our previous work [9] and the Theoretical Domains Framework (TDF), [22] a framework that groups component constructs from relevant behavioural theories into theoretical domains, were used to inform the topic guide for this study. The topic guide was refined as the interviews progressed.

### Data collection

Group interviews involving two or at most three participants were planned to encourage participation and these were conducted in English language by the female researcher (LP, MSc, Research Associate). Resources for an interpreter were not available. The interviews were conducted in the community venues where the participants attended their PA sessions and were conducted in parallel with on-going sessions although always in a separate room. Interviews lasted between 60 and 75 minutes. As in previous work, [9] we allowed flexibility within the areas outlined in the topic guide and the women were encouraged to report what mattered to them. Active listening with prompts was employed to provide clarification and improve insight. Notes were made of related topics introduced by the participants and the topic guide was developed as the interviews progressed. All interviews were audio-recorded and transcribed, as close to verbatim as possible by staff in the Institute of Health and Society at Newcastle University who have transcription expertise.

### Analysis

We used the Framework approach [23] for data analysis. Transcripts were read, checked, and imported into NVivo V9 [24] to facilitate coding. The themes emerging from the data were first classified according to the *a priori* theoretical domains identified from the TDF and included in the topic guide as: intentions and goals; reinforcement; knowledge; nature of the activity; social role and identity; social influences; capabilities and skills; behavioural regulation and decision; emotion; and

Formatted: Font or grammar

environment. LP performed the initial classification according to the TDF themes and these were then checked by SUD, differences being resolved through discussion. The use of NVivo software and the TDF defined *a priori* categories facilitated the analysis and promoted familiarisation with the data. Further analysis of the data within each of the theoretical domains, and reference to an empirical phenomenology approach, [25] which is primarily about retaining the appreciation of the respondents' subjective world, led to the identification and agreement of cross cutting constructs.

## RESULTS

We conducted nine interviews (seven dyad interviews and two interviews with groups of three participants). All 20 interview participants were recruited from among the first 78 female Pakistani intervention recruits in three areas of the town (Breckon Hill, Abingdon and Green Lane), with ages ranging from 26 to 45 years and a mean of 33.5 years. For this group of interview participants, their baseline risk of future T2D based on FINDRISC score ranged from 11 to 22 with a mean score of 15. A FINDRISC score of 11 to 14 represents moderate risk, with one in six likely to develop T2D within ten years and a FINDRISC score of 15 to 20 represents high risk with two in six likely to develop T2D within 10 years. The participants' English Index of Multiple Deprivation (IMD) scores, based on their postcodes of residence, ranged from 11 to 78 with a mean IMD score of 43 (which ranks among the most deprived English quintile); IMD scores are an ecological, composite measure based on routinely available data in seven categories of deprivation assessed, at the Lower Super Output Area (LSOA): a small administrative area with a population of about 1500. ~~of residence from provided post-codes, ranged from 11 to 78 with a mean IMD score of 43 (which ranks among the most deprived English quintile).~~ Details of participant characteristics are shown in Table 1.

Some women were less confident in their use of English language than others and the women tended to organise themselves so that the interview groups included at least one participant who was confident in her own ability to express herself in English. Sometimes the women would converse briefly between themselves in their first language to check their use of English. Those who were more confident tended to speak more, although this was sometimes to clarify what the other person had said for the benefit of the researcher, who only spoke English. Quotes are assigned to groups (Table 1) and where group discussion is reported we have used numerals (i, ii) to identify different speakers.

Within the *a priori* TDF domains, (intentions and goals, reinforcement, knowledge, nature of the activity, social role and identity, social influences, capabilities and skills, regulation and decision, emotion, and environment), we identified and analysed the anticipated themes relating to participants' own PA and dietary behaviours. We also identified three further cross-cutting themes



which we have grouped as 'collateral health and social benefits'. These three composite themes related to participants' perspectives of (1) their psychological health, (2) their family role and responsibility for the health of others, and (3) an ethos of inclusion and accommodation of differences.

**Table 1: Participant baseline variables: group means**

| Group identifier        | Number in the group | Age (years) | FINDRISC score | IMD score * |
|-------------------------|---------------------|-------------|----------------|-------------|
| A                       | 2                   | 33          | 20             | 46          |
| B                       | 2                   | 30          | 12.5           | 52          |
| C                       | 2                   | 31          | 13             | 78          |
| D                       | 3                   | 35          | 15             | 69          |
| E                       | 2                   | 36          | 13             | 20.5        |
| F                       | 2                   | 40          | 14.5           | 37          |
| G                       | 3                   | 32          | 14             | 18          |
| H                       | 2                   | 29          | 14.5           | 29.6        |
| I                       | 2                   | 45          | 17             | 34.5        |
| <b>All participants</b> | 20                  | 34          | 15             | 43          |

\* a higher score indicates a higher level of deprivation

## Participants own physical activity and dietary behaviours

### *Intentions and goals*

Health concerns were frequently stated as a reason for taking part in the intervention and associated with an appreciation of the opportunity afforded by the availability of this intervention programme. There was an understanding of the increased diabetes risk associated with Asian ethnicity as described by one woman,

*'I just about got myself motivated that it's for health reasons ... especially with the diabetes... we as Asians, we get diabetes.'* (Group I).

Occasionally less explicitly health associated reasons would be mentioned such as,

*'Because we will gonna be like fit and we are gonna be smart and look nice.'* (Group C)

The intervention documentation was organised by the provider to promote action planning.

Participants were encouraged to write an action plan for themselves for the next week (such as drink

**Formatted:** Font or grammar

1  
2  
3 a glass of water instead of a fizzy drink at lunchtime). This planning was recalled as explained in this  
4 quotation,  
5

6  
7 *'Every week we give a self-challenge, we are not going to do this, we are not going to eat this, we*  
8 *are going to eat something else.'* (Group C).  
9

10  
11 More generally goal setting was closely related to being part of the group and the need to engage  
12 with group activities,  
13

14  
15 *'We have to go to the classes: we try our best to go to classes.'* (Group A).  
16

### 17 **Reinforcement**

18  
19 Most of the reinforcement centred on feedback from other people, especially others in the group,  
20 for example,  
21

22  
23 *'It was pointed out that I was getting more defined on my waist and that was like really brilliant.*  
24 *It was a great motivator.'* (Group F)  
25

### 26 **Knowledge**

27  
28 Tailoring of dietary advice was much appreciated. There was frequent reporting of quantities of oil  
29 and salt to include in making home cooked curries, often introduced with an air of disbelief  
30 regarding how much oil and salt they had previously added to cooked food. They appreciated advice  
31 to reduce these quantities gradually so that the change in taste was less obvious, but they explained  
32 that as they became used to the different tastes they even preferred them.  
33  
34

35  
36 Perhaps surprisingly the risk effect of family history needed clarification, as explained here,  
37

38  
39 *'I know my uncle in Pakistani, he's got diabetes and his leg is quite bad actually. I didn't know, I*  
40 *didn't realise I would be at risk, because he's an uncle, he's not my dad and then it was quite a bit*  
41 *of a shock when they said no actually he's part of your family.'* (Group E).  
42  
43  
44

### 45 **Nature of the activity, capabilities and skills**

46  
47 There was a range of experience within this group of women. Many were quite new to the physical  
48 activities that were presented in the programme and were gradually attuned to them by the  
49 trainers, as explained by one woman,  
50

51  
52 *'They proper explain it, they do exercise and they keep telling us as well both ways.'* (Group A)  
53

54  
55 Generally the opportunity to participate in PA was valued and the women were pleased with what  
56 they had achieved. One woman described her effort and the beneficial effects she felt,  
57  
58

1  
2  
3 *'Trust me when I do work-out I'll be drenched, you know, and there's lots of ladies that really put*  
4 *the effort in, but it's like built your confidence.'* (Group G).

### 7 **Social role and identity, and social influences**

8 These domains were particularly important for this group of Pakistani women and additionally  
9 contribute to the cross-cutting collateral benefits that we identified (detailed below). The women  
10 were mostly homemakers and mothers and often described themselves in relation to this role,  
11

12  
13  
14 *'You put yourself back and you give your children more.'* (Group F).

15  
16 The social responsibility to provide hospitality was sometimes seen as detrimental to their progress  
17 in achieving a healthy lifestyle,  
18

19  
20  
21 *'I have to buy some unhealthy foods in, just because it's the norm, people expect something like*  
22 *that on the table and what happens is, if I bought it in I'll end up eating it myself.'* (Group F).

23  
24  
25 There was an expectation that the CIC providers would understand and accept the social and cultural  
26 issues that were pertinent to this participant group, because the delivery staff themselves were from  
27 the Muslim community as described by one woman,  
28

29  
30  
31 *'Because she's [trainer] Asian as well, she knows how to change basically, she knows the things*  
32 *that Asians ... whereas English people have different diet to what Asians do, our diet is totally*  
33 *different, whereas she helped us a lot by telling us small changes that we could make in our daily*  
34 *intake of food and the like type of cooking that we could do.'*

35  
36  
37 The appreciation of the efforts that were being made by the CIC providers who were known to many  
38 of the women participants was evident. This was described by one interviewee,  
39

40  
41  
42 *'I think [they are] helping our Asian community ladies, especially the oldies to come out [of the*  
43 *house]. ... They give her [the trainer] blessing.'* (Group D).

44  
45  
46 Recruitment by word of mouth was emphasised; people described how they had been encouraged  
47 to come by reassurance from those already engaged in the programme such as:  
48

49  
50  
51 *'Friends are like encouraging you. 'no you have to come, you have to come,' just it helps*  
52 *socialising and get out as well, because you don't realise you can get out,'* (Group G), and *' it*  
53 *really helps to have someone saying actually it's ok to come,'* (Group B).

54  
55  
56 The women also described how later on they themselves had encouraged others and become  
57 'champions' in promoting the intervention,  
58

1  
2  
3  
4  
5  
6  
7  
8  
9  
10  
11  
12  
13  
14  
15  
16  
17  
18  
19  
20  
21  
22  
23  
24  
25  
26  
27  
28  
29  
30  
31  
32  
33  
34  
35  
36  
37  
38  
39  
40  
41  
42  
43  
44  
45  
46  
47  
48  
49  
50  
51  
52  
53  
54  
55  
56  
57  
58  
59  
60

*'And then after I tell them it's really nice, come you see, it's really, really nice' (Group B).*

### **Regulation and decision**

Regulation centred on attending the PA sessions, where prompts to attend were naturally provided as part of the women's usual routine. For example after taking the children to school the women could attend a session in an adjacent community venue.

*'Every Monday we go, [to the activity session] like half nine till half ten,' (Group C).*

With regard to diet there was some appreciation of the need for portion size control, for example by using a smaller plate. Sweet fizzy drinks were perceived as addictive, therefore difficult to regulate and better avoided. The dietary advice offered included information about reading food labels, which was reported as helpful for making decisions about food choices. The fact that some sweet foods, specifically intended for Asian festivals, did not have nutrition labels was mentioned by some of the women participants.

### **Emotion**

Worry about the risk of diabetes, because of family members with the disease, and concern for relatives already suffering from diabetic complications was often mentioned, sometimes with regret for those who had not been able to make beneficial lifestyle changes. Retinopathy was specifically mentioned where it had affected younger aged relatives to the detriment of their quality of life.

There was also some mention of possible embarrassment about going to the gym, described as,

*'Making a fool of myself,' (Group E)*

In contrast the enjoyment experienced by participating in the activity sessions was often mentioned.

*'We have a good laugh and we have good things.'(Group C)*

*But then the time flies by, you don't realised where the time has gone and you had a workout, but you had a laugh.' (Group E)*

*It's the motivation of seeing each other and as well as having a laugh, you enjoy your time here.'*  
*(Group B)*

### **Environment**

The main environmental issue, as anticipated for this population group, was the provision of a female only facility. This is a broader criterion than just a single room, for example in a leisure centre, set aside for an hour. This requirement includes access to changing and toilet facilities with

reassurance that the area would be securely restricted to women during the sessions and no man would accidentally just walk in. There were also environmental issues of concern around the cold weather and the cost of attending sessions (once the free and subsidised period had expired).

*'It's so cold. At the moment I've stopped walking because it's cold. (Group A)*

*'In the park all friends go together but sometimes I said I don't want to go 'it's too cold' (Group D)*

*'You have to look at it from the financial point of view, how much is the charge going to be? If I want to come three times a week how much is that going to be? (Group F)*

*'Everything is expensive nowadays, just your basic household things cost an arm and a leg, so money is a big issue, but I think just for fitness the prices that they've got now are reasonable' (Group H)*

## Collateral health and social benefits

### Psychological health

Participants' perspectives of their psychological health involve sub-themes relating to, 'safety and freedom' (cultural acceptance and feeling comfortable) and 'positive affect' (feeling happier, less isolated, and not depressed).

Reference to Islamic culture used in [recruitment/engagement](#) strategies was influential, as described by one participant,

*'The advert [Radio Ramadan] was talking Islamic, like people in Islam history, the women. In those days women were like quite fit and strong and they had to be and that's what got me in [to the programme] (Group D).*

Similar references were used by the community provider during the sessions and contributed to the [engagement strategies. This was reflected in](#) perspectives of cultural acceptance that made the women comfortable,

*'You know the instructor... and sometimes they talk in our own language and we just do jokes.'*  
(Group A)

Feeling safe and comfortable was a regular and much emphasised theme, as described clearly by members of one group,

*'i) It's easy for me to say, 'I'm going to a ladies only gym, there's no men there,' and I know there will be no disapproval from the male side of our family.*

ii) I felt like the whole mental pressure was lifted because I could justify to anyone that I am in an entirely female environment.

i) He [husband] is in the mind that my wife is in a safe environment. ii) It is completely peaceful in mind. (Group F)

The relief from anxiety was expressed by one participant as,

'You can just do exercise, you are not like wary - is anyone [male] suddenly going to walk through the door.' (Group D)

Other aspects of feeling safe were about confidence to exercise. For example,

'That's what they teach you, 'listen to your own body', whatever your body allows you go to that speed and level. With me being a blood pressure patient..... Absolutely I found no fear, no worry and I was in a good safe environment.' (Group F).

The purposeful social grouping, and the opportunity this presented for women to talk together and support each other appeared to promote greater confidence within participants' perceived role: as described by one woman when talking about cooking for the family,

'if you are the main cook then it's part of your role, if you got the knowledge [re: healthy food choices] (Group G)

Another woman talked about cooking for her husband,

'When I go home I say, 'I'm going to cook and you are going to eat, this is how I am going to cook.' Husband was a bit like, you know, like it is -isn't it? 'Ah, you are not going to cook like that?' 'Oh yes I am, but it will taste nice.' (Group F).

There were also explicit references to depression and isolation such as,

'She [relative] spent time at home a lot and I think a lot of depression got to her' (Group E)

Contrast was made between this relative's experience and the beneficial effect they perceived through the option to participate in appropriate social meeting.

Two women in another group discussed depression in explicit relation to the intervention and the difference participation in a social and active group made to them in comparison to their previous behaviours.

1  
2  
3 *'i) If you stay home all day obviously it's different isn't it? I was very, very lazy. I didn't used to go*  
4 *out. I just used to stay at home all the time.*

5  
6 *ii) Watch TV.*

7  
8 *i) Watch TV and just do the housework and just eat. Sit down in one place. So now I am very*  
9 *active. This year we got the choice to get depressed or to go out and get fresh'. (Group A).*

10  
11 Another woman talked about how she had lived in the area for six years, but previous to joining the  
12 programme had only known one friend. She explained how she had now been welcomed by the  
13 group and how she communicated with other women outside the sessions, such as about transport  
14 arrangements to get to classes where needed.  
15  
16  
17  
18

### 19 **Family role and responsibility for the health of others**

20 The women's pivotal role within the family as the main cook was perceived as conveying a  
21 responsibility for their family's health that was often explained such as,  
22

23  
24 *'We have responsibility, we doing the shopping, we bring all the best things back for them' (Group*  
25 *D).*  
26  
27

28  
29 In relation to this there were clear statements that the knowledge and support the women had  
30 received through the programme would empower them to make healthy changes for their own  
31 benefit with the added consequence of influencing other family and community members. One  
32 person clearly spoke about this as:  
33  
34

35  
36 *'By educating the women I think what you are doing is you are empowering the women to sort of*  
37 *make decisions, informed decisions 'cos they know that, 'this is right', this is wrong'. Then they are*  
38 *in turn helping their younger, and extended elders.' (Group F)*  
39  
40  
41

42 Similarly another woman described how her perception of responsibility had changed,  
43

44 *'Now I go outside [of the house, to the sessions] I know what to do to my child you see. I want*  
45 *to give good things you know.' (Group D)*  
46  
47

48 A description of specific changes was supplied by another group,  
49

50 *'We have stopped biscuits, we stopped cakes, we stopped crisps, we stopped everything, even*  
51 *we stopped white bread as well, we start brown bread and everything like brown rice.'*  
52  
53

54  
55 This confidence to change extended to encouraging their children to exercise and even jokingly to  
56 the possibility that they might influence their husbands as explained in discussion with laughter  
57 by one group,  
58  
59  
60

1  
2  
3 *'i) I wanna send mine [husband].*

4 *ii) Yeah, I said to mine, 'Get out there'.*

5  
6 *i) They are jealous wasn't it, looking at us, and now, 'Look we [imagining husbands' speaking]*  
7  
8 *need to work out.'* (Group G).

9  
10 There was also an appreciation by the women of the way their own health would impact on others  
11 as explained in the following,

12  
13  
14 *'I'm the one that makes – does everything, if for some reason my health suffers then everyone*  
15 *else in our family suffers.'* (Group E)

### 16 17 18 **An ethos of inclusion and accommodation of differences**

19 The Pakistani women within this group had a range of faith related preferences. A particular  
20 example was that some women did not want to participate in activities that involved music and the  
21 other women in the activity group were encouraged, by the trainer, to respect and accommodate  
22 these wishes so the issue was resolved. This issue and its resolution were reported by one or two  
23 groups,  
24  
25  
26

27  
28 *'Then [the trainer] said, 'No, they don't like music on' then [everyone] agree as well. They said,*  
29 *'Oh you are so kind, because we don't like music.'* (Group C).

30  
31  
32 Although this intervention targeted ethnic minority participants, the additional PA sessions run by  
33 the community provider were open to other paying customers and attracted a few of the local  
34 women from the white population, who were welcomed as described by one woman,  
35  
36

37  
38 *'Four white women were there and we had such a laugh with them as well, you know trying to*  
39 *speak our lingo and we were like, we tried like, the one that do speak English they are trying to*  
40 *say their words... we are having a laugh and everything'* (Group E).

41  
42  
43 This inclusivity was similarly described by another group,  
44

45  
46 *' i) The more the merrier and I think as long as it is women only it doesn't matter what ethnicity or*  
47 *what race or what age, we don't care .*

48  
49 *ii) I'm sure women from non-Muslim background they will probably feel intimidated by gyms*  
50 *anyway and they might find coming to a women only gym- Wow this is great!' (Group F).*

51  
52  
53 The women themselves even encouraged wider participation,  
54

55  
56 *'I've been recommending it to lots of Asians [and] English ladies, because they [all] like Bollywood*  
57 *music don't they?'* (Group G).

58  
59  
60 **Formatted:** Font  
or grammar



1  
2  
3 The appreciation of issues that would be common to all women was described by one group  
4 member as,

5  
6  
7 *'When women work together from different cultures we all find that we have the same fears, the*  
8 *same sort of issues about our bodies and how we want to look better'(Group F) .*  
9

## 10 11 **DISCUSSION**

### 12 13 **Main findings**

14  
15 The NLNY intervention is unusual in being centred on group delivered PA sessions. The Pakistani  
16 women's appreciation of the opportunity to engage in group delivered PA sessions in a culturally  
17 appropriate and socially supportive environment was an important finding. This qualitative study  
18 suggests that provision of culturally appropriate PA sessions will facilitate the engagement of  
19 Pakistani women and encourage their PA and dietary behaviour change. The study results emphasise  
20 the importance of social influences and the women's own perceived social role and identity for  
21 intervention development. The fact that the delivery staff were from the local Pakistani women's  
22 own community contributed to recruitment and engagement of the participants.  
23  
24

25  
26 The engagement of Pakistani women in this culturally acceptable, social and proactively healthful  
27 context may have important health and social benefits in addition to those specifically intended by  
28 the intervention. We have described these unanticipated additional effects as 'collateral health and  
29 social benefits' and they comprise: a potential positive impact on the women's own psychological  
30 health including reduction in feelings of isolation and depression; improved knowledge and  
31 confidence with which to fulfil their perceived role as having responsibility for providing healthy food  
32 for their families and thus encouraging healthy lifestyles in their children; and an ethos of  
33 accommodation for the range of different cultural variation within local groups of women.  
34  
35

### 36 37 **Strengths and limitations**

38  
39 This qualitative study was conducted quite early in the life of the intervention programme, when the  
40 women had been involved in the intervention for less than six months. It was not clear whether early  
41 enthusiasm for the intervention would be sustained. The interviews were conducted in English,  
42 which was not the participants' first language. Although participants could all speak some English  
43 and were able to translate for each other to an extent, the accuracy of these translations remains  
44 unclear. The small group, mostly dyadic, format for conducting the interviews, and the fact that they  
45 took place alongside intervention sessions that the women would usually be attending, facilitated  
46 study engagement. The disadvantage of this was that the interview rooms were not very quiet and  
47 so some of the recordings were difficult for the staff undertaking the transcriptions. We were able to  
48  
49  
50  
51  
52  
53  
54  
55  
56  
57  
58  
59  
60

1  
2  
3 call on an experienced staff team to ensure the transcriptions were as accurate as possible. The  
4 interview arrangements were made by the intervention delivery staff, which could mean some bias  
5 in the choice of respondents, although we accessed women from different areas of the town and we  
6 were aware of a diverse range of cultural differences among Pakistani women who participated. The  
7 researcher who conducted the interviews was not Pakistani and only spoke English; however, the  
8 interviewees were open and friendly, keen to communicate their views and to do so in a way that  
9 could be understood beyond their cultural group. The group of women who took part in the  
10 interview study were aged from 27 years to 45 years and most were under 40 years of age. This is  
11 the younger age range of the typical target population for T2D prevention. We do not know how  
12 effective the intervention will be in attracting older women. There was some suggestion that these  
13 younger women might recruit older relations to take part in the intervention and it will be valuable  
14 to assess the recruitment age profile over time.

### 23 **Comparison with other studies and implications**

24 The NICE guidance for risk identification and provision of preventive interventions for high-risk  
25 individuals included recommendations for adults aged 25 to 39 of South Asian ethnicity, who are not  
26 included in the NHS Health Checks programme.[1] The findings from a recent National Institute for  
27 Health Research (NIHR) Health Technology Assessment evidence synthesis confirmed the  
28 importance of adapting health promotion interventions for ethnic minority communities and  
29 suggested that adaptation decisions should be based on detailed understanding of the target  
30 community.[16] Our plans for the adaptation of the NLNY intervention [10 26] to engage people  
31 from the local ethnic minority communities were therefore appropriate. The service commissioners  
32 took the lead in convening an operational group that included representation from the evaluation  
33 team. The commissioners were able to expand existing community links. Members of the local  
34 ethnic minority communities were invited to a dissemination seminar that was arranged to promote  
35 the NLNY intervention in its original format and invite interest in the adaptation.

36  
37  
38  
39  
40  
41  
42  
43  
44  
45 In the interview study reported here we sought to explore Pakistani female participants' views and,  
46 particularly in preparing the topic guide, we were able to draw on information from our qualitative  
47 evaluation within the original NLNY intervention.[9] ~~As we experienced with In-~~ the original NLNY  
48 intervention, community based recruitment was successful, with 218 participants recruited to the  
49 programme from 367 registers of interest in under two years. The benefit of community based  
50 recruitment procedures was also experienced in the PODOSA trial.[27] Early indications from this  
51 interview study suggest the potential of community based recruitment strategies for Pakistani  
52 Women. The adapted NLNY intervention was unusual in being provided through a CIC.[28] It was

1  
2  
3 evident that some of the women interviewed knew the intervention providers and that this  
4 positively affected their confidence and decision to participate.  
5  
6

7 The social support engendered by the nature of the intervention was evident, as it was in the  
8 original NLNY intervention, and this reflects the more general literature around social support and  
9 behaviour change.[29] The social needs of this specific participant group to undertake various  
10 physical activities were of paramount importance for their engagement and confidence to become  
11 involved in the intervention. Whereas other interventions may be counselling based, whether this is  
12 individually or group delivered, NLNY ~~centres on incorporates~~ group delivered PA, which is provided  
13 as a fundamental pre-requisite of experiential learning, in a central role. The provision of occasional  
14 female only sessions in local authority leisure centres does not constitute ideal provision of  
15 appropriate facilities (for example if the toilets are in common areas). In this feasibility phase the  
16 provision of staff training so that women from the Pakistani community could conduct PA sessions in  
17 appropriate and convenient community venues, including school premises, was of immediate  
18 importance for the continued intervention delivery.  
19  
20  
21  
22  
23  
24  
25  
26

27 The identification of beneficial effects on other aspects of participants' own health that may result  
28 from their participation in PA intervention delivered in social groups and the 'spill over' effects of  
29 health promotion on other family members is supported by other evidence. [30-33] This additional  
30 benefit may have importance for health economic evaluation of interventions designed to promote  
31 increased PA, especially where these are delivered to groups that are organised to promote social  
32 support networks.  
33  
34  
35  
36  
37

### 38 **Unanswered questions and future research**

39 The feasibility study of the adapted version of the NLNY intervention, which was planned to better  
40 engage members of the local ethnic minority communities, is on-going and we plan to analyse the  
41 recruitment, retention and outcomes at 12 months follow-up by sex and ethnic group. The entire  
42 feasibility study, together with our previous work relating to the original NLNY intervention[8] and  
43 the related qualitative studies, including the interview study reported here, [9] will inform plans for  
44 optimisation of the intervention and options for definitive evaluation of the NLNY intervention for  
45 effectiveness and cost effectiveness.  
46  
47  
48  
49  
50  
51  
52  
53

### 54 **Acknowledgements**

55 We thank the participants in the adapted version of the New life, New you intervention, particularly  
56 those who gave their time for these interviews. We thank the project implementation team  
57  
58  
59  
60

including NHS health promotion staff and intervention delivery staff, especially Claire Robinson and Shazia Noor.

### Funding

Integral to the London 2012 Olympic and Paralympic Games was the aspiration that the Games would encourage more people across the UK to participate in physical activity. In the North East of England this Olympics vision and the regional health strategy provided the foundation for the 'New life, New you' intervention that was originally funded as a 2012 Olympic Legacy Project by a consortium including: Sport England, Middlesbrough Council, Middlesbrough Primary Care Trust, the North East Strategic Health Authority. The adapted version of the New life, New you intervention was designed to better engage the local ethnic minority community and funded by Middlesbrough Primary Care Trust. MW and FFS are funded in part by the British Heart Foundation, Cancer Research UK, the Economic and Social Research Council, Medical Research Council and National Institute of Health Research (NIHR) as director and senior investigator respectively of Fuse - the Centre for Translational Research in Public Health, which is a UKCRC Public Health Research Centre of Excellence. The funders had no role in study design, data collection and analysis, decision to publish, or preparation of the manuscript. The views expressed herein are those of the authors and not necessarily those of the above named funders or UKCRC.

### Abbreviations

CIC Community Interest Company

FINDRISC Finnish Diabetes Risk Score

IMD UK Government Statistics index of multiple deprivation

NICE UK National Institute for Health and Care Excellence

NLNY 'New life, New you' intervention

T2D Type 2 diabetes

TDF Theoretical Domains Framework of behaviour change

REPS UK Register of exercise professionals

### Authors' contributions

MW was a member of the Steering Group responsible securing funding and for the outline plan for the original NLNY intervention and evaluation. LP contributed to the development of the NLNY pilot intervention and designed the feasibility evaluation. Adaptation of the NLNY intervention was later planned to better engage local ethnic minority communities. This interview study was planned by LP as part of the evaluation of the adapted NLNY intervention. LP conducted the interviews. FFS, SUD and MW provided advice on the analysis. LP conducted the preliminary analysis which was then discussed and agreed with SUD. MW, FFS and SUD, reviewed, and contributed to the manuscript drafted by LP. All authors read and agreed the final version.

### Competing interests

Formatted: Font or grammar

The business case and outline plan for the original 'New life, New you' study was determined by a steering committee. This included representatives from members of the organisations that comprised the funding consortium as well as the Principal Investigator for the evaluation, co-author MW. The detailed development of the intervention was then progressed by a small operational team including the evaluation researcher, co-author LP. The adapted version of the New life, New you intervention was funded by Middlesbrough PCT. The funders had no role in the collection, analysis, and interpretation of data, the writing of the article and a decision to submit it for publication. Co-authors: MW, FS, SD and LP receive salaries from Newcastle University, Institute of Health and Society that provide open access funding for the publication. The authors declare that they have no other competing interests.

### Data sharing

There is no additional data available

### References

1. NICE. PH 38 Preventing type 2 diabetes - risk identification and interventions for individuals at high risk. 2012. <http://guidance.nice.org.uk/PH38> (accessed 17/09/2013).
2. Forouhi NG, Merrick D, Goyder E, et al. Diabetes prevalence in England, 2001—estimates from an epidemiological model. *Diabetic Medicine* 2006;**23**(2):189-97 doi: 10.1111/j.1464-5491.2005.01787.x[published Online First: Epub Date]].
3. Pollard TM. Ethnic Groups as Migrant Groups: Improving Understanding of Links Between Ethnicity/Race and Risk of Type 2 Diabetes and Associated Conditions\*. *Annual Review of Anthropology* 2011;**40**(1):145-58 doi: doi:10.1146/annurev-anthro-081309-145719[published Online First: Epub Date]].
4. Knowler WC, Barrett-Connor E, Fowler SE, et al. Reduction in the incidence of type 2 diabetes with lifestyle intervention or metformin. *New England Journal of Medicine* 2002;**346**(6):393-403
5. Tuomilehto J, Lindstrom J, Eriksson JG, et al. Prevention of type 2 diabetes mellitus by changes in lifestyle among subjects with impaired glucose tolerance. *New England Journal of Medicine* 2001;**344**(18):1343-50
6. Costa B, Barrio F, Cabré JJ, et al. Delaying progression to type 2 diabetes among high-risk Spanish individuals is feasible in real-life primary healthcare settings using intensive lifestyle intervention. *Diabetologia* 2012:1-10 doi: 10.1007/s00125-012-2492-6[published Online First: Epub Date]].
7. Jain SH, Horton ES, (Editors) KK. Advancing the Science and Practice of Diabetes Prevention. *American Journal of Preventive Medicine* 2013; **44**,(4 Supplement 4):A1-A4, S297-S400
8. Penn L, Ryan V, White M. Feasibility, acceptability, and outcomes at 12 months follow-up of a novel community based intervention to prevent type 2 diabetes in adults at high risk: mixed methods pilot study. *BMJ Open* 2013
9. Penn L, Dombrowski SU, Sniehotta FF, et al. Participants' perspectives on making and maintaining behavioural changes in a lifestyle intervention for type 2 diabetes prevention: a qualitative study using the theory domain framework. *BMJ Open* 2013;**3**(6) doi: 10.1136/bmjopen-2013-002949[published Online First: Epub Date]].
10. Penn L, Lordon J, Lowry R, et al. Towards the translation of research evidence to service provision: experience from North East England, UK. In: Peter Schwarz, ed. *Diabetes Prevention in Practice*. Dresden, 2010.
11. Neighbourhoods Statistical Release. The English Indices of Deprivation 2010. In: Department for Communities and Local Government, ed. <http://www.statistics.gov.uk>: Crown Copyright, 2011.
12. Sport England. Active People Survey 1. Secondary Active People Survey 1 2007. <http://www.sportengland.org/>.

13. Lindstrom J, Tuomilehto J. The diabetes risk score: a practical tool to predict type 2 diabetes risk. *Diabetes Care* 2003;**26**(3):725-31
14. Kolb D A. *Experiential learning : experience as the source of learning and development* Englewood Cliffs, N.J. : Prentice-Hall 1984.
15. Office for National Statistics UK. Middlesbrough Local Authority. 2013. <http://www.neighbourhood.statistics.gov.uk>.
16. Liu J, Davidson E, Bhopal R, et al. Adapting health promotion interventions to meet the needs of ethnic minority groups: mixed-methods evidence synthesis. *Health Technol Assess* 2012;**16**(44)
17. Netto G, Bhopal R, Lederle N, et al. How can health promotion interventions be adapted for minority ethnic communities? Five principles for guiding the development of behavioural interventions. *Health Promotion International* 2010;**25**(2):248-57
18. Samsudeen BS, Douglas A, Bhopal RS. Challenges in recruiting South Asians into prevention trials: Health professional and community recruiters' perceptions on the PODOSA trial. *Public Health* 2011;**125**(4):201-09 doi: <http://dx.doi.org/10.1016/j.puhe.2011.01.013>[published Online First: Epub Date]].
19. MRC (Medical Research Council UK). Developing and evaluating complex interventions: new guidance. 2008; <http://www.mrc.ac.uk/Utilities/Documentrecord/index.htm?d=MRC004871>. [www.mrc.ac.uk/complexinterventionsguidance](http://www.mrc.ac.uk/complexinterventionsguidance) (accessed 17/09/2013).
20. Babakus W, Thompson J. Physical activity among South Asian women: a systematic, mixed-methods review. *International Journal of Behavioral Nutrition and Physical Activity* 2012;**9**(1):150
21. Davies M, Khunti K, Chauhan U, et al. The handbook for vascular risk assessment, risk reduction and risk management: University of Leicester, 2008.
22. Francis J, O'Connor D, Curran J. Theories of behaviour change synthesised into a set of theoretical groupings: introducing a thematic series on the theoretical domains framework. *Implementation Science* 2012;**7**(1):35
23. Ritchie J, Lewis J, editors. *Qualitative research practice: a guide for social science students and researchers*. London: Sage Publications, 2003.
24. QSRInternational. NVivo 9. 2012
25. Aspers P. Empirical Phenomenology: A Qualitative Research Approach (The Cologne Seminars). *Indo-Pacific Journal of Phenomenology* 2009;**9**(2)
26. Penn L, Lordon J, Lowry R, et al. Translating research evidence to service provision for prevention of type 2 diabetes: development and early outcomes of the 'New life, New you' intervention,. *British Journal of Diabetes and Vascular Disease* 2011;**11**(4):175 - 81
27. Douglas A, Bhopal R, Bhopal R, et al. Recruiting South Asians to a lifestyle intervention trial: experiences and lessons from PODOSA (Prevention of Diabetes & Obesity in South Asians). *Trials* 2011;**12**(1):220
28. Community Interest Companies. Department for Business, Education and Skills,. 2013. (accessed 17/09/2013).
29. Absetz P, Valve R, Oldenburg B, et al. Type 2 diabetes prevention in the "real world": one-year results of the GOAL Implementation Trial. *Diabetes Care* 2007;**30**(10):2465-70
30. Basu A, Meltzer D. Implications of spillover effects within the family for medical cost-effectiveness analysis. *Journal of Health Economics* 2005;**24**(4):751-73
31. Falba TA, Sindelar JL. Spousal concordance in health behavior change. *Health Services Research* 2008;**43**(1 P1):96-116
32. Goebbels AFG, Lakerveld J, Ament AJHA, et al. Exploring non-health outcomes of health promotion: The perspective of participants in a lifestyle behaviour change intervention.

Formatted: Font or grammar

1  
2  
3  
4  
5  
6  
7  
8  
9  
10  
11  
12  
13  
14  
15  
16  
17  
18  
19  
20  
21  
22  
23  
24  
25  
26  
27  
28  
29  
30  
31  
32  
33  
34  
35  
36  
37  
38  
39  
40  
41  
42  
43  
44  
45  
46  
47  
48  
49  
50  
51  
52  
53  
54  
55  
56  
57  
58  
59  
60

Health policy (Amsterdam, Netherlands) 2012;**106**(2):177-86 doi:

<http://dx.doi.org/10.1016/j.healthpol.2012.04.005>[published Online First: Epub Date]].

33. Gorin AA, Wing RR, Fava JL, et al. Weight loss treatment influences untreated spouses and the home environment: Evidence of a ripple effect. International Journal of Obesity 2008;**32**(11):1678-84

For peer review only

Formatted: Font or grammar

## Consolidated criteria for reporting qualitative studies (COREQ): 32-item checklist

Developed from:

Tong A, Sainsbury P, Craig J. Consolidated criteria for reporting qualitative research (COREQ): a 32-item checklist for interviews and focus groups. *International Journal for Quality in Health Care*. 2007. Volume 19, Number 6: pp. 349 – 357

| No. Item                                       | Guide questions/description                                                                                                                              | Reported on Page # |
|------------------------------------------------|----------------------------------------------------------------------------------------------------------------------------------------------------------|--------------------|
| <b>Domain 1: Research team and reflexivity</b> |                                                                                                                                                          |                    |
| <i>Personal Characteristics</i>                |                                                                                                                                                          |                    |
| 1. Inter viewer/facilitator                    | Which author/s conducted the inter view or focus group?                                                                                                  | 6                  |
| 2. Credentials                                 | What were the researcher's credentials?<br>E.g. PhD, MD                                                                                                  | 6                  |
| 3. Occupation                                  | What was their occupation at the time of the study?                                                                                                      | 6                  |
| 4. Gender                                      | Was the researcher male or female?                                                                                                                       | 6                  |
| 5. Experience and training                     | What experience or training did the researcher have?                                                                                                     | 6                  |
| <i>Relationship with participants</i>          |                                                                                                                                                          |                    |
| 6. Relationship established                    | Was a relationship established prior to study commencement?                                                                                              | 6                  |
| 7. Participant knowledge of the interviewer    | What did the participants know about the researcher? e.g. personal goals, reasons for doing the research                                                 | 6                  |
| 8. Interviewer characteristics                 | What characteristics were reported about the inter viewer/facilitator? e.g. Bias, assumptions, reasons and interests in the research topic               | 6                  |
| <b>Domain 2: study design</b>                  |                                                                                                                                                          |                    |
| <i>Theoretical framework</i>                   |                                                                                                                                                          |                    |
| 9. Methodological orientation and Theory       | What methodological orientation was stated to underpin the study? e.g. grounded theory, discourse analysis, ethnography, phenomenology, content analysis | 6                  |
| <i>Participant selection</i>                   |                                                                                                                                                          |                    |
| 10. Sampling                                   | How were participants selected? e.g. purposive, convenience, consecutive, snowball                                                                       | 6                  |
| 11. Method of approach                         | How were participants approached? e.g. face-to-face, telephone, mail, email                                                                              | 6                  |
| 12. Sample size                                | How many participants were in the study?                                                                                                                 | 7                  |
| 13. Non-participation                          | How many people refused to participate or dropped out? Reasons?                                                                                          | N/A                |
| <i>Setting</i>                                 |                                                                                                                                                          |                    |
| 14. Setting of data collection                 | Where was the data collected? e.g. home, clinic, workplace                                                                                               | 6                  |
| 15. Presence of non-participants               | Was anyone else present besides the participants and researchers?                                                                                        | 6                  |
| 16. Description of sample                      | What are the important characteristics of the sample? e.g. demographic data, date                                                                        | 7                  |



|    |                                        |                                                                                                                                 |        |
|----|----------------------------------------|---------------------------------------------------------------------------------------------------------------------------------|--------|
| 1  | <i>Data collection</i>                 |                                                                                                                                 |        |
| 2  | 17. Interview guide                    | Were questions, prompts, guides provided by the authors? Was it pilot tested?                                                   | 6      |
| 3  | 18. Repeat interviews                  | Were repeat inter views carried out? If yes, how many?                                                                          | No     |
| 4  | 19. Audio/visual recording             | Did the research use audio or visual recording to collect the data?                                                             | 6      |
| 5  | 20. Field notes                        | Were field notes made during and/or after the inter view or focus group?                                                        | 6      |
| 6  | 21. Duration                           | What was the duration of the inter views or focus group?                                                                        | 6      |
| 7  | 22. Data saturation                    | Was data saturation discussed?                                                                                                  | No     |
| 8  | 23. Transcripts returned               | Were transcripts returned to participants for comment and/or correction?                                                        | No     |
| 9  | <b>Domain 3: analysis and findings</b> |                                                                                                                                 |        |
| 10 | <i>Data analysis</i>                   |                                                                                                                                 |        |
| 11 | 24. Number of data coders              | How many data coders coded the data?                                                                                            | 7      |
| 12 | 25. Description of the coding tree     | Did authors provide a description of the coding tree?                                                                           | 7      |
| 13 | 26. Derivation of themes               | Were themes identified in advance or derived from the data?                                                                     | 7      |
| 14 | 27. Software                           | What software, if applicable, was used to manage the data?                                                                      | 7      |
| 15 | 28. Participant checking               | Did participants provide feedback on the findings?                                                                              | No     |
| 16 | <i>Reporting</i>                       |                                                                                                                                 |        |
| 17 | 29. Quotations presented               | Were participant quotations presented to illustrate the themes/findings? Was each quotation identified? e.g. participant number | 8 - 15 |
| 18 | 30. Data and findings consistent       | Was there consistency between the data presented and the findings?                                                              | N/A    |
| 19 | 31. Clarity of major themes            | Were major themes clearly presented in the findings?                                                                            | 8 - 15 |
| 20 | 32. Clarity of minor themes            | Is there a description of diverse cases or discussion of minor themes?                                                          | N/A    |

21  
22  
23  
24  
25  
26  
27  
28  
29  
30  
31  
32  
33  
34  
35  
36  
37  
38  
39  
40  
41  
42  
43  
44  
45  
46  
47  
48  
49  
50  
51  
52  
53  
54  
55  
56  
57  
58  
59  
60

**Once you have completed this checklist, please save a copy and upload it as part of your submission. When requested to do so as part of the upload process, please select the file type: *Checklist*. You will NOT be able to proceed with submission unless the checklist has been uploaded. Please DO NOT include this checklist as part of the main manuscript document. It must be uploaded as a separate file.**
